# Supplementary material for: Prevalence, Awareness, Treatment, Control and Risk Factors Associated with Hypertension among Adults in Southern China, 2013
Source: PLoS One. 2016 Jan 19;11(1):e0146181. doi: 10.1371/journal.pone.0146181 (PMC4718602; doi:10.1371/journal.pone.0146181)
Supplement: S1 Table — (XLS) [file pone.0146181.s001.xls]

## Sheet: 1
S1 Table. Minimal data set
ID	sex	education	marriage	profession	smoke	drink	familynumber	salt	sport1	sport2	sport3	sport4	sport5	fruit1	fruit2	fruit3	vegetable1	vegetable2	vegetable3	sporthour1	sportminutes1	sporthour2	sportminutes2	sporthour3	sportminutes3	sporthour4	sportminutes4	sporthour5	sportminutes5	treatment	famhis1	famhis2	height	weight	waistline	bfp	vai	sbp1	dbp1	sbp2	dbp2	sbp3	dbp3	TC	TG	HDLC	LDLC	GLU
33033001	1	3	1	1	0	1	5	99.9	2	2	7			1	0	4	1	0	2	3	0	3	0	0	15						0	1	167	60.2	79.1	23.6	6	128	83	128	89	124	88	4.49	0.7	1.35	2.82182	4.64
33033002	1	3	1	1	0		3	99.9			7			1	0	2	1	0	3					1	0					0	1	1	164.4	65.3	83.6	24.7	10	142	85	132	83	135	87	6.1	1.24	1.29	4.24636	4.09
33033003	1	3	1	1	1	0	3	1	7		7			3	3	1	1	0	1	0	10			0	15					0	0	0	170	71.5	85	21.9	10	130	86	128	89	128	84	4.55	2.13	1.27	2.31182	4.65
33033004	1	2	1	1	0		5	0.1	5		5			1	0	2	1	0	2	8	0			0	15						0	0	170	73.1	86	23.7	10	121	75	113	71	111	68	4.92	1.72	0.89	3.24818	4.76
33033006	1	2	1	4	0		3	1			7			1	0	2	1	0	5					1	0					2	0	0	172	73.7	87.7	24	11	135	94	133	90	137	94	4.86	3.31	0.75	2.60545	4.92
33033007	1	1	1	1	1	1	3	99.9		6				1	0	2	1	0	1			9	0								0	9	173.2	92.1	102.4	30.2	18	124	89	126	86	128	90	4.38	0.68	0.86	3.21091	4.93
33033008	1	3	1	1	0		3	0.5	2					1	0	4	1	0	4	0	30										0	0	168.2	52.1	67	19	3	122	79	112	78	116	79	4.41	1.04	0.96	2.97727	4.5
33033009	1	2	1	1	1	1	3	99.9						1	0	6	1	0	3											0	0	1	155	65.8	92.6	24	14	118	89	120	92	128	90	5.61	2.25	0.93	3.65727	4.07
33033010	1	3	1	1	1	1	4	0.5	1					1	0	6	1	2	0	0	2									0	1	0	161.4	66.5	86.8	25.5	11	146	96	141	90	138	90	5.89	1.76	1.11	3.98	4.86
33033011	1	3	1	1	1	0	3	2			7			1	0	9	1	0	2					2	0						0	0	162	54	71	17.4	5	114	68	110	64	112	73	4.05	0.51	1.29	2.52818	4.5
33033012	1	1	1	1	0	1	4	0.5	2					1	0	6	1	0	5	1	0									1	0	1	162.2	56.3	80.6	20.7	6	148	96	145	99	150	100	6.06	7.11	0.67	1.8	6.08
33033013	1	6	1	1	0		4	1			2			1	0	8	1	0	5					0	20						1	0	161.8	71.5	87.7	25.4	13	118	78	120	73	116	72	4.91	1.85	1.09	2.97909	4.39
33033014	1	5	1	1	0	1	4	0.5	1	4	7			1	0	6	1	1	0	1	0	1	0	2	0						0	0	178	73.4	84.8	21.9	8	127	76	134	78	123	76	4.7	1.2	1.15	3.00455	5.25
33033015	1	2	1	1	1	1	3	0.7			3			1	0	6	1	0	2					0	15						0	0	172.6	64.5	75	24	7	107	81	116	83	115	78	4.81	0.41	1.02	3.60364	4.66
33033016	1	3	1	4	1	1	3	0.5			2			1	0	4	1	0	3					0	15						0	1	173.4	76.6	83.5	22.6	11	126	84	122	84	120	87	4.82	0.44	1.19	3.43	5.73
33033017	1	2	1	1	0		3	0.2	4					1	0	6	1	0	2	1	0									0	1	0	172.8	81.1	91.8	25.6	13	131	90	124	90	132	89	4.39	0.95	0.95	3.00818	4.94
33033018	1	3	1	1	2	1	3	99.9						1	0	6	1	0	4					0	15						0	0	167.6	73	86.1	23.3	11	109	65	103	67	102	71	7.08	2.46	0.99	4.97182	6.05
33033019	1	3	1	1	0		3	0.5		3	7	4	2	1	0	6	1	0	5			0	10	3	0	1	30	0	15	0	1	1	162.2	61.6	79.5	24.2	9	138	85	140	84	139	87	6.15	2.95	0.91	3.89909	5.13
33033020	1	3	1	1	2	1	3	99.9				3		1	0	6	1	0	5							1	0				1	0	180.8	64.6	75.3	14.8	4	122	73	117	73	115	72	4.65	0.68	1.37	2.97091	4.42
33033021	1	3	1	1	2	1	5	99.9		2				2	0	5	1	2	0			0	30								0	1	163.4	64.4	83.5	25.4	9	133	93	128	88	126	88	5.24	1.09	1.44	3.30455	5.66
33033022	1	2	1	4	1		3	0.6						1	1	2	2	0	1												0	0	171.2	68.4	85.1	22.7	9	126	73	121	70	122	71	5.05	0.83	1.19	3.48273	4.47
33033023	1	3	3	1	1		4	1	2	3	7		7	1	0	4	1	0	3	0	30	0	15	0	30			0	20		0	0	160.6	47.9	66.8	10.8	3	104	63	110	67	101	64
33033024	1	4	1	1	0		3	8		1	5	3	3	1	0	7	1	0	2			2	0	0	15	1	15	1	0		1	0	163.4	73.4	80.7	23.1	13	141	87	132	86	139	91	4.09	0.72	1.24	2.52273	4.41
33033025	1	2	1	1	0	1	4	0.5	5	3	7			1	0	6	2	2	0	0	40	2	0	0	10						1	0	171.8	80.3	92.3	25.3	13	135	84	141	85	132	88	5.67	2.58	1.18	3.31727	5.21
33033026	1	3	1	1	2	0	3	99.9	5					1	0	8	1	0	5	2	0									0	1	1	173.8	86.1	99.4	25.9	15	138	95	137	90	140	90	6.81	1.27	1.04	5.19273	5.34
33033027	1	1	0	1	1		4	1	5		7			1	0	8	1	0	2	5	0			1	0						0	0	162	61.3	71	21.1	9	116	74	114	72	110	71	3.62	0.37	1.16	2.29182	4.8
33033028	1	3	1	1	2		4	99.9			1			1	0	3	1	1	0					0	15						1	9	170.8	71	82	21.5	9	150	100	155	98	145	96	3.85	0.54	1.42	2.18455	6.91
33033029	1	3	1	1	1	0	4	0.8		1	7			1	0	6	1	0	3			8	0	0	30						0	0	170	66	86.4	22	7	121	77	116	77	117	79	5.34	2.02	0.92	3.50182	5.39
33033030	1	2	1	4	0		3	99.9		2	6		6	1	0	5	1	0	2			2	0	1	0			2	0		1	0	170	72.8	87.1	23.7	11	113	83	114	80	109	76	6.14	1.89	1.16	4.12091	5.44
33033031	1	3	1	1	1		3	0.3	2					1	1	2	1	0	2	0	2									0	0	1	161.6	69.2	87.8	22	12	144	89	146	85	143	91	6.2	2.76	1.01	3.93545	4.55
33033032	1	3	1	1	1	1	9	2	2	1	1		1	1	0	4	1	0	5	1	0	0	30	0	30			2	0		1	0	168.6	53.5	72	10.1	3	105	70	104	68	99	68	5.2	1.38	0.9	3.67273	4.65
33033033	1	3	1	1	1		4	99.9						1	0	6	1	0	3												0	1	165.6	55.7	71.3	13.2	5	105	60	101	62	101	62	4.43	0.3	1.14	3.15364	4.8
33033034	1	2	1	1	1		3	1		2	3			1	0	8	1	0	2			1	20	0	20						0	0	174.4	62.9	79.5	13.1	5	116	68	109	64	110	64	5.13	0.92	1.08	3.63182	4.8
33033035	1	3	1	1	0		8	2	6	2	4		3	1	0	6	1	0	4	2	0	0	30	1	0			1	0		0	0	168.8	67.8	78.8	19.1	8	108	79	112	77	110	76	4.98	1.22	1.2	3.22545	4.77
33033036	1	3	1	4	2	1	3	99.9						1	0	8	1	1	0											0	1	9	172.6	73.4	89.3	23.5	10	156	101	150	96	153	102	5.63	2.87	0.92	3.40545	4.36
33033037	1	5	1	1	0		10	0.8	2				2	1	0	6	1	0	3	0	5							0	30		0	0	174.8	81.6	88.2	26	12	141	82	143	78	147	77	4.9	0.8	1.06	3.47636	4.72
33033038	1	3	1	1	2	1	4	1	2		7		2	1	0	6	1	0	2	0	15			1	0			1	30		0	0	176	57	69.4	16.1	3	108	67	106	69	108	69	3.9	0.77	1.03	2.52	4.9
33033039	1	5	1	1	1		3	0.2			2			1	0	4	1	0	3					0	30						1	1	170.6	55.1	70	15.6	3	116	71	114	70	110	74	5.56	0.54	1.69	3.62455	5.65
33033040	1	3	1	1	0	0	3	99.9			2	5		1	0	6	1	0	2					0	20	1	0				1	1	176.6	79.2	87.3	24.6	11	109	66	111	60	108	62	4.96	0.75	1.07	3.54909	5.16
33033041	1	3	1	4	1	1	3	1.2			5		5	1	0	6	1	0	2					1	0			1	0	1	1	1	170.4	82.6	93.7	27	14	151	103	147	100	143	100	4.29	1.34	0.94	2.74091	4.9
33033042	1	2	1	1	1		3	0.5					2	1	0	6	1	0	5									0	30		0	1	169.8	69.1	81.4	21.6	9	109	73	114	69	113	69	5.64	1.32	0.94	4.1	4.9
33033043	1	3	1	4	1		3	1		1	5			1	0	6	1	0	2			0	5	0	10						0	1	165.4	62.8	78	22.8	8	122	67	114	62	114	60	5.82	0.75	1.41	4.06909	5.22
33033044	1	2	1	1	1	1	4	1		2	7			1	0	6	1	0	5			0	15	0	15						0	0	164.4	62.3	86.1	22.7	8	131	76	127	77	125	80	6.53	2.46	0.93	4.48182	4.43
33033045	1	3	1	1	0	1	4	1	2	2	3			1	0	6	2	1	0	1	0	0	10	1	0						0	0	181.4	79.8	87.8	22.6	9	134	87	129	82	129	83	5.23	1.21	0.94	3.74	5.34
33033046	1	3	1	1	0		5	1	7	7	4		3	1	0	6	1	0	1	0	15	0	30	0	30			1	0		0	0	170	70.9	83.2	21.4	9	130	70	124	71	128	66	5.06	1.73	0.98	3.29364	4.9
33033047	1	3	1	1	1		3	1		3	3		3	1	0	6	1	0	5			1	0	1	0			0	30		0	0	165.4	67.7	83.5	21.1	10	107	67	99	67	104	67	4.67	1.29	0.92	3.16364	5.22
33033048	1	2	1	1	1		5	0.8		3	3	3		1	0	7	1	0	2			2	0	0	30	1	0				0	1	172.4	94.3	100	28.2	19	136	71	139	65	136	67	5.49	0.96	1.16	3.89364	4.94
33033049	1	4	1	1	1	1	3	99.9	1		7	3		1	0	6	1	0	2	0	30			0	30	0	30				1	1	170.2	67.6	77.5	18.7	8	113	62	104	66	104	67	4.53	0.69	1	3.21636	4.66
33033050	1	3	1	1	1	1	4	99.9		3	5			1	0	3	2	0	2			0	30	0	15					2	0	1	170.8	76.6	94.3	26.7	12	136	100	136	93	136	95	6.01	0.94	1.05	4.53273	4.37
33033051	1	3	1	1	0	1	2	0.2				1		1	1	2	1	0	2							0	10				0	0	171.8	74.5	88.3	26.4	10	124	80	116	79	119	84	4.86	3.89	0.98	2.11182	4.46
33033052	1	4	1	4	0	1	4	0.7		1	2			1	0	7	1	0	2			0	20	0	30					0	0	1	162.8	78.2	96	28.4	16	142	98	138	99	132	94	6.26	1.75	1.11	4.35455	5.36
33033053	1	3	1	1	1		4	99.9		2	2			1	0	8	1	0	5			0	30	0	10						0	0	174.6	54.1	66.1	8.9	2	120	76	119	71	119	71
33033054	1	3	1	1	1	1	4	99.9			7		7	1	0	6	1	0	2					0	30			0	40		1	1	166	70.5	81.3	22.8	11	119	69	113	68	110	62	5.6	0.48	1.31	4.07182	12.43
33033055	1	2	1	4	0	1	3	0.4			3			1	0	7	1	0	3					0	30					0	0	1	161.4	63.2	80.7	24.8	10	130	88	137	89	136	91	5.05	1.2	1.01	3.49455	4.83
33033056	1	3	1	1	1		4	0			7			1	1	0	1	0	3					0	20						0	0	172.6	69.4	80.2	19.6	8	117	76	118	77	118	78
33033057	1	5	1	1	1	0	3	0.4			5		3	1	0	6	1	0	4					0	20			0	30	2	1	1	171.6	71.1	90.3	20.2	9	140	94	138	89	143	88	5.5	3.34	0.59	3.39182	4.44
33033058	1	3	1	1	1	1	3	0.5		2	2			1	0	6	1	0	4			0	30	2	0					0	0	0	167.8	57.2	82.2	26.6	5	153	108	155	107	152	102
33033059	1	3	1	1	1	0	4	99.9		1	1		1	1	0	3	2	0	7			1	0	0	30			0	30		0	0	173.4	102	116	31.6	22	138	83	145	89	140	88	4.95	2.53	1.02	2.78	4.78
33033060	1	2	1	4	1	1	4	0.5		1	3		3	1	0	6	1	0	3			1	0	0	20			0	30		0	0	158.8	63	82.2	25.2	11	116	74	115	76	112	75	4.65	0.44	1.99	2.46	4.6
33033061	1	3	1	1	1	1	6	99.9	3	1	3		2	1	0	5	1	0	3	1	50	0	25	0	30			0	30		1	1	160.8	56.3	74.3	16	6	119	82	122	82	122	75
33033062	1	2	1	1	1	1	4	99.9	7		7			1	0	2	1	0	2	1	0			0	20					0	9	9	160.2	57.4	74.1	21.9	8	99	60	103	60	106	60	4.6	1.86	1.11	2.64455	3.87
33033063	1	3	1	1	2	1	3	0.5		1	5	3	3	1	0	7	1	0	3			1	0	0	30	0	30	0	30		0	0	172.2	82.9	91.8	25.5	14	148	104	139	105	149	103	4.92	1.56	1.04	3.17091	3.69
33033064	1	3	1	1	2	0	4	99.9				6	4	1	0	8	1	0	3							1	0	0	30		0	0	175	79.5	86.5	21.8	11	137	96	138	91	145	93	4.85	1.95	0.94	3.02364	5.36
33033065	1	4	1	1	0	1	8	2	2	1	3		2	1	0	6	1	0	5	1	0	0	30	1	0			1	0		0	1	174.2	66.1	78.1	19.1	6	118	76	121	76	122	73	5.54	1.82	0.91	3.80273	5.43
33033066	1	2	1	1	1	1	3	0.5		5	5		1	1	0	6	1	0	4			0	30	2	0			0	30		0	0	172.2	66.5	82.4	17.6	7	116	73	113	76	113	73	4.09	0.77	1.11	2.63	5.2
33033067	1	3	1	1	1	1	3	99.9			5			1	0	8	1	0	2					0	20						0	0	172.2	79.4	92.7	25.6	12	128	83	123	82	121	77	4.92	3.36	1.11	2.28273	6.35
33033068	1	3	3	1	1	1	2	99.9			7	2		1	0	6	1	0	2					0	30	0	30				0	0	161.6	58.6	83.8	22.1	7	141	98	138	98	135	98	4.18	1.3	1.3	2.28909	4.31
33033069	1	3	1	1	0		3	1	7		7		7	1	0	8	2	2	0	3	0			0	15			2	0		0	0	165.2	68.4	81	21.2	10	126	68	123	66	121	63	5.42	0.81	1.41	3.64182	4.32
33033070	1	1	1	4	0		2	0.5		7	7			1	0	6	1	0	2			1	0	2	0					2	0	0	161.6	65.1	86	30	15	141	68	133	60	138	60
33033071	1	1	1	1	0	1	4	99.9		7				1	0	8	1	0	3			4	0								1	1	164.4	76.7	96.6	26.2	15	133	95	125	88	131	92	6.73	2.01	1.26	4.55636	5.65
33033073	1	1	3	1	1	0	7	99.9						1	0	5	1	0	3												0	0	161	46.6	64	13.3	2	99	69	92	68	101	68	4.21	2.97	1.28	1.58	4.81
33033074	1	3	1	1	0	0	8	1			7			1	0	6	1	0	4					0	30					2	1	0	175	82.8	94.4	23.2	12	135	87	129	85	130	85	3.91	1.09	1.07	2.34455	5.68
33033075	1	1	1	1	0	1	2	0.5	1	2	7			1	0	6	1	0	3	0	30	0	30	0	30						0	0	171	64.6	78.8	22.2	8	109	76	112	78	108	82	5.16	1.19	1.41	3.20909	4.7
33033076	1	2	1	4	0		2	5		7	7		7	1	0	6	1	0	5			0	20	0	45			0	10		0	0	158.8	68	89.1	28.6	17	160	75	151	73	153	72	6.37	5.66	0.78	2.21	6.03
33033077	1	4	1	4	1		4	0.6						1	0	9	1	0	2												0	1	153.8	54.8	76.5	21.3	9	119	73	120	76	118	73	5.4	1.27	1	3.82273	4.6
33033078	1	2	1	1	0		4	1	4					1	0	8	2	0	4	6	0										0	0	159.2	62.4	84.9	20.3	10	133	90	131	91	136	91	6.06	1.5	1.15	4.22818	4.69
33033079	1	3	1	1	1	0	6	99.9			5			1	0	3	1	0	3					3	0						0	0	177.8	85.7	88.4	23.8	13	116	81	115	75	113	75	5.26	1.31	0.91	3.75455	4.95
33033080	1	3	1	1	0		2	0.5		7				1	0	4	2	0	3			0	30								0	1	168.6	71.1	83.5	21.1	11	112	70	112	67	113	72	5.15	0.68	0.89	3.95091	4.89
33033081	1	1	1	1	0	1	4	1	7		7			1	0	8	1	0	2	1	0			1	0					0	0	0	176.6	79.5	90	26.5	12	156	105	158	101	159	106	5.19	1.36	1.38	3.19182	6.26
33033082	1	3	1	1	1	1	4	2	7		7			1	0	2	1	0	3	8	0			0	30					0	0	9	160.4	55.2	72.4	15.2	7	163	105	157	97	162	100	5.11	0.74	1.47	3.30364	6.52
33033083	1	2	1	4	0		3	99.9						1	0	8	2	0	3												0	9	159	48.4	72.4	24	4	123	68	122	78	129	68	4.7	2.23	0.94	2.74636	4.88
33033084	1	2	1	1	0	0	3	0.5	1					1	0	8	2	0	2	0	30										0	1	160.8	73.7	87.7	74.8	16	142	94	138	89	138	90	3.63	2.19	0.76	1.87455	5.98
33033085	1	2	1	1	0	0	5	99.9					7	1	1	0	1	0	3									3	0	2	0	0	165.2	80.8	96.3	28.7	17	131	88	138	90	129	86	4.37	0.82	1.12	2.87727	4.57
33033086	1	2	1	4	0		5	0.4			2			1	0	7	1	0	3					0	30					2	0	0	159.6	65.5	87.6	26	15	133	81	130	78	124	77	4.41	0.96	0.91	3.06364	5.46
33033087	1	3	1	1	1	1	4	0.4		3	1			1	0	7	1	0	3			1	0	0	30						0	1	169.4	78.6	93.9	28.4	15	143	92	141	88	135	90	7.52	1.7	1.1	5.64727	5.59
33033088	1	4	1	1	1	1	4	1		2	7		3	1	0	6	1	0	2			0	30	0	20			0	20		1	0	176.2	83.6	93.4	26.2	14	126	88	120	82	122	83	5.56	1.13	1.41	3.63636	4.51
33033089	1	4	1	1	2	1	3	99.9		4				1	0	2	1	0	3			2	0								1	0	176.2	74.2	85	23	10	114	78	116	79	124	83	6.15	1.41	1.27	4.23909	5.82
33033090	1	1	1	1	1	1	3	0.4	5	3				1	0	7	1	0	3	2	0	1	0							0	0	0	162	63.2	85.5	23.1	10	130	93	137	94	133	97	4.16	1.91	1.2	2.09182	5.28
33033091	1	1	1	1	2	0	2	0.3			5			1	0	2	1	0	3					1	0					0	9	9	172.4	69.8	81.8	17.6	9	145	98	143	94	143	96	3.8	0.65	0.9	2.60455	5.25
33033092	1	2	1	1	1	1	1	0.2		7	7	7		1	0	2	1	0	3			3	0	0	30	0	10				0	0	156.2	63.5	82.2	20.8	13	146	86	143	88	144	89	4.98	2.3	1.03	2.90455	9.25
33033093	1	1	1	1	0	1	3	0.4		5	2			1	0	7	1	0	4			0	30	0	20						0	0	169.2	60	74	21.5	6	119	86	120	84	127	82	5.39	0.71	1.18	3.88727	5.15
33033094	1	2	1	1	0	1	3	0.4			7			1	0	3	1	0	2					0	20						9	9	171.4	79.8	95.6	32.6	15	126	88	120	82	122	83	5.89	1.26	0.96	4.35727	7.02
33033095	1	2	1	1	1	1	4	99.9			3			1	0	8	1	0	2					0	15						0	0	169.6	82.4	96	21.5	15	120	77	112	69	115	70	4.42	0.63	1	3.13364	5.96
33033096	1	2	1	1	1	1	6	99.9	6		6		4	1	0	2	1	0	5	9	0			0	30			0	30		0	1	156.8	59	77.5	20	10	133	81	133	82	131	80	4.68	0.63	1.07	3.32364	4.42
33033097	1	1	1	1	1		6	0.5		1	2			1	0	6	2	0	4			0	30	0	20						0	0	167.2	57	74.4	19	6	109	63	109	61	99	62	4.65	0.74	0.83	3.48364	5.24
33033098	1	1	1	4	1	1	4	1		1	7		7	1	0	6	3	0	2			0	30	1	0			1	0		0	0	169	77.1	95	28	14	120	81	124	85	121	86	6.02	7.88	0.67	1.72	6.18
33033099	1	1	1	4	0		2	99.9		7	6			1	0	2	1	0	3			0	40	0	40						0	0	168.2	65.9	83	27.3	11	118	84	119	80	114	81	6.17	1.02	1.21	4.49636	4.52
33033100	1	4	1	1	1	1	4	2						1	0	5	1	0	3												0	0	166.8	79	89.1	27.8	15	130	85	125	75	124	80	5.98	2.51	0.9	3.93909	6.03
33033101	1	2	1	1	0		4	2		7				1	0	9	1	0	2			3	0								1	0	169.2	73.3	85.2	24.5	12	120	78	126	82	120	77	4.56	0.54	1.21	3.10455	4.76
33033102	1	1	1	1	1		7	2	7		7			1	0	8	2	1	0	8	0			0	30					1	1	0	160.2	54.5	75.8	20.4	7	128	83	127	88	125	93	4.46	0.46	1.03	3.22091	5.07
33033103	1	2	1	1	0	1	5	99.9						1	0	7	1	0	5											0	0	1	167	72.9	86.8	24.1	12	148	95	149	100	141	95	6.22	1.39	1.55	4.03818	4.83
33033104	1	4	1	1	0		3	0.4		2	3		3	1	0	6	1	0	4			0	30	0	30			1	30		0	1	160.4	63.5	85.2	25.8	11	106	64	102	62	101	64	4.43	1.5	0.96	2.78818	5.52
33033105	1	2	1	1	0		3	99.9						1	0	3	1	0	2												0	0	169	88.4	97.3	26.5	19	138	95	134	95	134	93	5.81	2.63	0.72	3.89455	5.3
33033106	1	1	1	4	1	1	5	0.5		2	3			1	0	2	1	0	2			0	30	0	30						0	0	173	77.6	89.7	28	13	120	81	118	81	117	81	6.52	1.67	1.55	4.21091	4.34
33033107	1	1	1	4	2		2	99.9			7			1	1	0	1	0	3					0	10						0	0	169	68.3	86.1	999.9	999.9	132	67	126	64	126	65	4.63	0.91	0.8	3.41636	8.63
33033108	1	2	1	1	1	1	4	99.9						1	0	6	1	0	2												0	0	174.8	58.7	77.6	21.3	4	133	96	140	86	135	90	4.84	0.89	1.48	2.95545	3.76
33033109	1	1	1	1	0		2	0.5		7	7			1	0	6	1	0	3			8	0	0	10					0	0	0	167	52.6	66.3	17.8	4	134	92	133	96	133	96	4	0.73	1.15	2.51818	4.76
33033110	1	1	1	1	0	1	4	0.5			1		3	1	0	6	1	0	3					0	20			0	30		0	0	168	81.5	96.2	25.7	16	119	83	122	81	124	80	5.87	0.74	1.51	4.02364	4.77
33033111	1	4	1	1	0	0	6	99.9		6	3		2	1	1	1	1	0	4			8	0	1	0			1	0	0	0	0	157.8	60.2	81.5	20.2	11	148	93	138	92	144	91	4.15	0.9	1.16	2.58091	5.01
33033112	1	2	1	1	0	0	5	99.9		2				1	0	3	1	0	5			0	40							2	1	0	161.4	68.8	82.6	23.5	14	129	88	128	90	119	83
33033113	1	3	1	1	0		5	0.4		5	3		3	1	0	6	1	0	3			0	30	0	30			0	30		0	1	160.6	71.1	96.6	30.2	16	130	86	139	86	131	83	6.7	1.96	1	4.80909	5.6
33033114	1	3	1	1	0		7	99.9						1	0	3	1	0	3												0	0	166.4	65.4	79.8	21.7	10	116	75	114	78	117	76	3.7	0.58	1.07	2.36636	8.71
33033115	1	1	1	1	1	1	3	0.8			7			1	0	6	1	0	2					1	0						0	1	161.8	61.1	74.8	16.9	9	130	75	123	71	126	69	5.06	0.47	1.76	3.08636	5.44
33033117	1	1	1	1	0	1	2	1	7		7			1	0	8	1	0	3	5	0			0	30					2	0	0	167.2	67.8	84.5	25.6	11	148	92	140	90	146	88	4.41	0.5	1.55	2.63273	5.61
33033118	1	1	1	1	1	0	4	99.9		5	5			1	0	8	1	0	3			3	0	0	20					0	9	9	168.6	60.9	74.6	18.3	7	130	88	129	96	123	90	4.45	0.78	1.31	2.78545	4.67
33033119	1	2	1	1	1		3	99.9					1	1	0	6	1	0	2									0	20		1	0	175.4	90.3	108.1	32.4	18	132	92	133	89	132	85	6.47	1.42	0.98	4.84455	4.77
33033120	1	1	1	4	1		2	0.5		2				1	0	7	1	0	4			1	0								0	0	157	57.4	81.3	22.4	10	124	84	126	87	126	84	3.85	0.68	1.01	2.53091	4.89
33033121	1	1	1	4	0	1	9	0.6						1	0	6	1	0	2												0	0	166.6	59.7	82.3	26.6	8	153	86	147	85	148	79	4.39	1.07	1.74	2.16364	4.4
33033122	1	2	1	1	0	1	5	1					3	1	0	6	1	0	5									0	30	2	1	0	164.2	76.5	93	27.1	16	130	82	122	87	120	81	5.16	1.35	1.02	3.52636	7.01
33033123	1	1	1	1	1	1	3	1	5					1	0	8	1	0	4	2	0										0	0	169	62.4	77.5	17	7	106	69	107	67	103	64	4.96	1.15	1.1	3.33727	4.98
33033124	1	1	1	4	1	0	4	99.9						1	1	2	1	0	6												0	1	174.2	70.1	82.5	26.8	10	122	76	117	67	115	67	4.71	1	1.11	3.14545	4.97
33033125	1	1	1	1	0	1	6	2	2					1	0	8	1	0	2	2	0									2	0	0	166	75.8	88	22.8	16	138	87	137	91	142	85	4.67	2.88	0.95	2.41091	8.22
33033126	1	1	1	4	1	1	5	0.5						1	1	4	1	0	5												0	0	172.4	68	87.2	24.3	9	133	75	136	80	140	74	4.42	0.7	1.9	2.20182	4.48
33033127	1	1	1	4	1	1	2	0.8						1	0	6	1	0	3											2	0	0	165.4	69.5	89.8	30.3	15	142	85	136	83	138	84	5.48	2.19	1.26	3.22455	5.02
33033129	1	1	1	4	1		6	0.5		2				1	0	8	1	0	4			1	0							2	0	0	168	73.5	87.1	26.7	13	132	85	135	87	131	82	3.36	1.77	0.57	1.98545	4.91
33033130	1	2	1	1	0	1	3	1			7		5	1	0	8	1	0	2					2	0			2	0		0	0	166.8	84.5	95.7	28.7	18	140	105	138	102	140	100	4.9	2.09	1.03	2.92	5.49
33033131	1	1	1	4	0		2	0.5		2	3			1	0	7	1	0	4			0	30	0	30						0	0	156.6	55	74.6	22.4	10	172	95	165	94	167	93	6.09	0.3	1.74	4.21364	5.33
33033132	1	3	1	2	1		2	1		7				1	0	5	1	0	4			2	0							0	0	0	159.6	60.6	90.9	19.9	9	161	85	152	85	157	87	5.54	0.66	1.61	3.63	3.6
33033133	1	1	1	4	0	1	5	0.4						1	0	6	1	0	3												0	0	155.6	55.6	71.1	18.6	9	119	73	115	68	114	73	4.69	0.61	1.63	2.78273	5.29
33033134	1	1	1	1	0	1	3	0.5		3	2			1	0	7	1	0	4			0	30	0	26						0	0	168	56.4	73.4	20.4	5	113	68	108	64	111	61	5.53	0.26	1.47	3.94182	4.2
33033135	1	2	1	1	1	1	4	2	5		5			1	0	8	2	0	2	1	0			1	0					0	1	1	165.8	68.8	87.2	22.7	11	110	77	113	81	119	78	4.61	0.78	1.16	3.09545	4.98
33033136	1	2	1	1	0	1	5	2					2	1	0	6	1	0	4									0	30	0	1	0	166.6	66.6	85.2	25	11	136	96	129	88	132	89	6.06	2.04	0.8	4.33273	6.07
33033137	1	1	1	1	1	1	3	0.5		2				1	0	6	1	0	4			1	0								0	0	161	62.7	76.9	17.4	11	132	75	127	72	129	75	7.16	0.82	1.38	5.40727	4.74
33033138	1	2	1	1	2	1	2	99.9						1	1	0	1	0	6												0	0	164.2	50.7	65.2	14.6	4	105	61	105	58	99	57	4.26	0.55	1.11	2.9	4.86
33033139	1	1	1	1	1	1	2	99.9	7					1	1	0	1	0	6	8	0										0	1	164.4	58.7	79.9	23.7	8	125	79	129	79	127	80	6.65	0.71	1.21	5.11727	5.95
33033140	1	2	1	1	0		5	1	7		7			1	0	6	1	0	3	0	30			0	30						0	1	161.6	72.8	90	27.1	16	114	70	111	67	115	69	5.86	1.22	0.97	4.33545	5.32
33033141	1	1	1	4	1		4	0.5		2	3		3	1	0	7	1	0	4			1	0	0	30			0	30		1	1	179.4	84	92.2	24.3	12	120	76	104	72	109	67	5.11	1.5	0.94	3.48818	4.01
33033142	1	2	1	4	0	0	2	1		4				1	0	6	1	0	4			1	30							0	0	0	163.8	54.5	72.4	20	6	123	76	118	77	120	74	4.88	1.78	0.89	3.18091	4.59
33033143	1	1	1	1	1	1	4	1	2	1	5			1	0	8	1	0	4	1	0	0	30	0	30						0	0	169	76.1	93.2	23.4	14	140	91	142	96	141	94	4.3	6.51	0.64	0.92	5.82
33033144	1	6	1	1	2	1	4	1						1	0	8	1	0	5												0	1	173.8	54.8	64.4	16.7	3	102	61	95	63	94	65	5.14	0.44	1.48	3.46	5
33033145	1	1	1	1	1	1	3	99.9						1	1	0	1	0	8												0	0	170.6	75	88	26.1	13	129	72	130	70	125	71	5.49	1.27	1.22	3.69273	6.88
33033146	1	2	1	1	1		4	99.9						1	0	6	1	0	2												1	1	164.8	63.7	83.3	20.4	8	112	69	105	66	115	70	5.59	0.88	1.09	4.1	5.05
33033147	1	1	1	4	1	1	2	99.9						1	1	2	2	0	8												0	1	167.2	72.6	89.7	28.8	14	134	80	128	86	128	84	7.03	1.06	0.96	5.58818	4.76
33033148	1	3	1	1	0		2	0.6			7			1	0	6	1	0	2					0	15					2	0	1	173.8	81.8	94	25.9	15	126	86	130	85	128	85	5.82	1.47	1.09	4.06182	5.58
33033149	1	3	1	4	0	0	4	2		5	7			1	0	8	1	0	4			1	0	0	30					2	0	1	173.2	89.3	99.5	30.7	18	132	85	125	80	122	78	4.39	1.17	0.94	2.91818	5.13
33033150	1	1	1	4	0	0	5	99.9					6	1	0	2	1	0	4									0	30	2	0	1	163.6	67.7	86.3	25.6	14	131	72	130	71	129	74	5.34	2.21	0.91	3.42545	7.02
33033151	1	2	1	4	1	1	2	0.4		2	5			1	0	7	1	0	4			1	0	0	30						0	0	158.6	59.6	88.6	24.2	12	141	72	143	73	143	68	5.71	1.67	1.26	3.69091	5.69
33033152	1	1	1	4	1	1	6	99.9						1	1	0	1	0	8											2	0	0	163.8	65.2	85	23.2	10	117	78	111	76	119	80	6.87	1.54	1.01	5.16	6.98
33033153	1	1	1	1	0	0	3	99.9	7					1	1	0	1	0	6	5	0									2	0	1	162.2	69.7	90.2	31.4	14	134	88	128	84	128	84	5.33	0.54	1.47	3.61455	5.5
33033154	1	2	1	4	1	0	4	99.9						1	1	2	1	0	5												0	0	159.8	63.7	86.4	24.9	12	115	62	112	60	112	57	5.57	1.46	1.05	3.85636	5.15
33033155	1	5	1	1	0		5	99.9						1	0	9	1	0	4												0	0	170.6	72.9	93.6	25.4	12	117	73	111	76	108	73
33033156	1	1	1	4	1	1	5	99.9						1	0	5	1	0	5												0	0	160	53.3	75	19.8	7	151	62	145	61	154	58	4.27	0.85	1.36	2.52364	3.61
33033157	1	1	1	1	1	1	5	99.9	3		7			1	0	9	1	0	3	8	0			1	0						1	0	163.6	60.6	79.8	21.4	9	142	88	147	86	138	80	4.66	0.57	1.63	2.77091	3.99
33033158	1	1	1	4	0		2	0.5		3	7		3	1	1	0	1	0	3			2	0	0	20			0	3		0	0	170.2	62.6	80.9	20.3	8	138	74	137	71	136	73	6.22	3.34	0.92	3.78182	4.93
33033159	1	2	1	1	1	1	5	99.9	7		7			1	0	8	1	0	3	8	0			0	30						0	0	162.8	58.6	76.6	18	8	119	67	110	66	112	59	4.74	0.46	1.11	3.42091	4.64
33033160	1	1	1	4	0	0	2	0.4						1	0	6	2	0	3											2	1	1	163.4	54.7	77.1	26.2	7	143	61	150	60	142	54	5.07	0.82	1.25	3.44727	4.82
33033161	1	1	1	4	2	0	5	99.9						1	0	6	2	0	5												0	0	170.8	57	69.7	16.3	5	109	66	113	70	112	69	4.89	0.54	1.54	3.10455	6.15
33033162	1	1	4	4	1	1	1	99.9						1	0	6	1	0	2												0	0	164.8	67.6	87.7	999.9	999.9	124	76	133	79	125	75
33033163	1	2	1	4	0		4	99.9			7			1	0	6	1	0	2					0	30						0	0	165	63.7	81.1	25.6	11	98	68	105	69	99	70	5.5	0.49	1.7	3.57727	7.03
33033164	1	2	1	1	0		3	99.9		2				1	1	0	1	0	2			0	30							1	0	0	166	78.9	95.2	27.1	18	178	95	171	91	187	96	3.02	0.76	1.03	1.64455	4.06
33033165	1	4	1	4	0		2	0.4			2		3	1	0	7	1	0	4					0	30			0	30	2	0	0	167.4	70.1	87.6	28.8	13	121	89	125	84	127	81	5.63	1.92	1.06	3.69727	4.96
33033166	1	2	1	4	0		2	0.5		5				1	0	6	1	0	4			2	0							1	0	0	160.2	53.9	76.5	23	8	146	79	154	79	152	83	5.37	1.06	1.3	3.58818	5.46
33033167	1	1	1	4	0	0	5	1						1	0	8	1	0	2											0	0	0	164	70.5	88.5	25.9	15	187	78	183	81	182	81	5.91	1.78	0.95	4.15091	5.22
33033168	1	2	1	4	1	0	2	0.5		4				1	0	8	1	0	4			0	18							2	0	0	160.6	56.9	80	23.9	9	160	80	164	72	160	73	4.6	1.38	0.82	3.15273	4.17
33033169	1	1	1	4	0		6	99.9						1	1	2	1	0	4												0	0	171.2	77.2	93.7	24	14	147	84	139	86	140	82	4.19	1.26	0.89	2.72727	5.32
33033170	1	1	1	4	0	1	6	0.8						1	0	7	1	0	5												0	0	163.6	79.2	100.3	29	20	130	63	122	66	125	66
33033171	1	2	1	4	0	1	6	99.9						1	0	6	1	0	5												0	1	162.4	76.1	96.7	27.1	19	127	70	123	72	118	73	5.36	1.01	1.35	3.55091	5.17
33033172	1	3	1	4	1	0	2	0.4		2	2			1	0	7	1	0	4			1	0	0	30					2	0	0	164.4	73.4	92.6	27.6	16	124	71	127	73	130	75	4.58	0.81	0.94	3.27182	4.79
33033173	1	1	4	4	0	0	1	99.9					6	1	0	8	1	0	1									1	0		0	0	157.4	49.5	79.4	26	12	144	75	145	68	141	71	4.31	1.22	1.2	2.55545	4.35
33033174	1	2	1	4	0	0	2	99.9						1	1	0	2	0	5												0	0	165	60.8	80.7	24.7	9	127	64	122	64	125	60	7.02	0.46	1.21	5.60091	5.09
33033175	1	1	1	4	0		2	0.4			3			1	0	1	1	0	4					0	20					2	0	0	163.4	66.2	90	999.9	999.9	143	74	137	75	135	78	5.77	1.62	1.13	3.90364	5.11
33033176	1	1	1	4	0	1	3	99.9						1	0	8	1	0	8												0	0	167.4	79.9	92.7	29.3	20	141	81	135	77	135	78	4.42	0.83	1.01	3.03273	7.18
33033177	1	1	1	1	1	1	2	99.9		1	1		3	1	0	6	1	0	2			0	10	0	30			0	30	2	0	0	168.2	71.5	86.2	27.2	14	157	74	157	72	157	73	3.38	0.67	1.11	1.96545	5.44
33033178	1	1	1	1	1	1	8	0.6		3				1	0	7	1	0	5			0	30								0	0	170.8	60.8	73.8	19.3	6	99	63	101	68	99	68	5.4	0.83	1.38	3.64273	4.86
33033179	1	2	1	4	2		2	2		3				1	0	8	1	0	4			1	30								0	0	166.2	60.7	79.9	999.9	999.9	117	62	121	66	123	65	4.41	0.87	1.23	2.78455	5.52
33033180	1	1	1	4	0		6	99.9					5	1	0	6	1	0	4									0	15	0	0	0	166.2	51	66.8	22.9	4	142	68	135	68	139	64	4.46	0.48	1.23	3.01182	5.37
33033181	1	2	1	4	0	1	2	99.9						1	0	4	1	0	3												9	9	157.6	52.6	74.5	999.9	999.9	132	69	130	72	130	72	4	1.39	0.98	2.38818	4.45
33033182	1	1	1	4	0	1	2	0.6						1	0	9	1	0	3											2	0	0	170.4	66.1	86.1	26.7	10	134	94	139	91	137	88	5.21	0.54	1.51	3.45455	5.25
33033183	1	1	1	4	1	1	1	0.4						1	0	8	1	0	4											2	0	0	162.6	75.6	97.3	29.7	20	130	89	127	84	127	84	5.27	1.46	1.09	3.51636	5.43
33033184	1	1	1	4	1		2	99.9		2	7			1	0	6	2	2	0			2	0	1	0						0	0	164.6	51.5	68	999.9	999.9	173	81	182	75	180	81	4.38	0.86	1.18	2.80909	4.8
33033185	1	1	1	4	1	1	5	0.6						1	0	6	1	0	5											2	0	0	164.2	71.6	99	32.5	17	140	76	135	81	139	73	6.09	1.42	1.23	4.21455	6.46
33033186	1	5	1	1	1	1	3	1			7		7	1	0	8	1	0	4					0	30			0	30	2	1	0	166.6	73.5	88.6	22.3	12	130	91	128	88	121	89	5.51	1.74	0.94	3.77909	4.61
33033187	1	1	1	4	0		2	99.9						1	0	6	1	0	6												0	0	164.8	65.9	85.4	999.9	999.9	106	56	111	55	104	54	4.68	0.54	1.21	3.22455	6.63
33033188	1	3	1	1	0	0	3	99.9						1	0	7	1	0	2												0	0	166.8	79.1	101.3	30.4	18	118	73	116	71	115	70	4.44	0.4	1.17	3.08818	8.7
33033189	1	5	1	1	0	1	3	99.9					2	1	0	8	1	0	8									2	0	2	0	0	161.8	68.3	83.6	26.2	12	131	88	138	91	136	87	5.07	1.6	1.17	3.17273	6.93
33033190	1	2	1	1	0	1	2	0.5						1	0	7	1	0	4												0	0	162.8	59	73.3	20.3	10	118	76	120	83	119	77	5.22	0.57	1.17	3.79091	4.7
33033191	1	1	1	4	1	1	3	99.9		7				1	0	6	1	0	6			1	0								0	0	161	58.8	85.2	27.5	10	120	79	117	74	117	77	5.05	0.5	1.51	3.31273	4.62
33033192	1	3	2	4	1		6	99.9						1	0	4	2	0	2											1	1	0	172.6	97.2	105.3	27.8	20	149	103	143	102	147	101	6.11	3.46	0.69	3.84727	5.92
33033193	1	4	1	1	0		6	2						1	0	6	1	0	2											2	0	0	168	72.6	92.8	28.8	14	119	85	125	88	119	89	5.35	1.47	0.86	3.82182	6.91
33033194	1	3	1	1	0	1	2	99.9					2	1	0	6	1	0	2									0	30	2	1	0	175.6	81.3	93.4	26.1	13	128	86	134	84	135	81	4.6	1.93	1.14	2.58273	4.61
33033195	1	2	1	1	1		9	0.8						1	0	9	1	0	2												0	0	171.2	83.6	96.2	27.3	17	136	81	133	84	130	82	5.06	0.77	1.26	3.45	5.25
33033196	1	3	1	1	1		2	1			5			1	0	8	1	0	2					0	30						0	0	171	72.7	86.7	24	11	136	87	133	89	139	88	5.66	1.91	0.72	4.07182	4.64
33033197	1	2	1	4	0	1	6	0.6						1	0	6	1	0	3												0	0	162.8	57.3	86.1	23.3	8	130	73	130	70	128	74	4.3	0.99	1.05	2.8	5.01
33033198	1	1	1	1	0		3	99.9						1	0	8	1	0	8												0	0	170	74.9	88.6	24.4	13	122	74	121	75	119	70	5.34	1.25	1.21	3.56182	5.42
33033199	1	1	1	1	1		5	99.9						1	0	8	1	0	8												0	0	162	84.1	104.7	29.2	23	129	80	131	79	124	78	4.88	0.74	0.8	3.74364	11.77
33033200	1	2	1	4	0	1	3	99.9		7	7			1	1	0	1	0	3			1	0	1	0					2	0	0	162.4	71.5	91.2	27	16	160	93	164	96	160	94	5.13	1	1.1	3.57545	5.23
33033201	1	1	0	4	0		1	0.5						1	0	7	1	0	5											2	0	0	155.2	60.9	83.1	28.5	15	155	84	155	80	151	74	5.31	0.77	1.08	3.88	4.59
33033202	1	1	1	4	0	0	2	1		2	7			1	0	8	1	0	2			0	30	0	30						9	9	165.2	67.4	87.3	25.3	13	151	79	143	80	144	78	3.37	0.87	0.86	2.11455	5.37
33033203	1	1	1	4	0		2	0.4						1	0	6	1	0	2												0	0	168	48.7	65.6	999.9	999.9	162	81	156	84	152	77	4.97	0.51	1.51	3.22818	5.24
33033204	1	1	1	4	0		2	0.3			3			1	0	8	1	0	5					0	20						0	0	146.8	39.8	61	17.8	4	103	58	107	60	106	61	3.87	0.51	1.5	2.13818	4.33
33033205	1	2	1	4	1		2	99.9		3	3			1	0	8	2	0	3			3	0	0	20					0	9	9	161	70.8	97.7	999.9	999.9	169	80	169	87	170	85	5.69	1.42	1.25	3.79455	5.14
33033206	1	2	1	4	0		4	1		7	7			1	1	1	1	0	3			8	0	0	15						0	0	152.2	44.5	61.4	16.1	5	98	58	101	61	97	57	5.62	0.82	1.04	4.20727	5.13
33033207	1	3	1	4	0		3	99.9						1	0	8	1	0	4												0	0	169.8	81	98.5	29.1	18	126	72	121	68	120	67	6.36	1.08	0.93	4.93909	5.19
33033208	1	2	1	4	1		6	99.9						1	1	2	2	0	2												0	0	163.4	70.5	89.8	23.6	14	115	69	108	68	116	66	5.98	1.91	1.03	4.08182	5.77
33033209	1	2	1	1	1	1	6	99.9						1	0	6	1	0	8											2	0	1	161	62.1	84	27.3	12	141	81	149	78	139	75	6.15	2.41	1.17	3.88455	6.04
33033210	1	5	1	2	0	0	5	99.9		1	4		3	1	0	6	1	0	2			0	30	0	25			0	20		0	1	169.6	80.9	91.9	24.8	14	132	82	124	88	124	80
33033211	1	1	1	4	1		2	0.5			3			1	0	7	1	0	5					0	30						0	0	161.4	49	66.7	20.3	5	123	62	126	65	133	67	4.44	0.9	1.29	2.74091	5.2
33033212	1	5	1	1	0		5	99.9						1	1	0	2	0	3												0	0	169.8	62.3	79.2	18.2	6	110	68	107	73	106	72	3.77	0.58	1.11	2.39636	5.09
33033213	1	3	1	1	0		5	1		1				1	0	8	1	0	3			0	30								0	0	168.6	61.2	72.8	19.9	7	125	80	125	82	122	81	5.27	0.4	1.55	3.53818	5.38
33033215	1	2	1	1	1	1	4	99.9	3		3			1	1	2	1	0	3	8	0			0	30						0	0	162	999.9	999.9	999.9	999.9	102	65	102	64	101	59	5.05	0.57	1.6	3.19091	4.63
33033216	1	2	1	1	1		2	99.9		1	1		3	1	0	9	1	0	2			0	30	0	20			0	30	0	0	0	172.6	74.1	90	26.6	11	176	100	173	102	180	103	6.05	3.61	0.76	3.64909	4.6
33033217	1	2	1	1	1		5	1	5	7	2			1	1	0	2	1	0	5	0	0	15	1	0						1	1	156.2	58.9	74.7	22.6	11	131	72	129	78	132	79	6.4	0.57	1.97	4.17091	5.13
33033218	1	5	1	1	1	1	3	99.9						1	1	0	1	0	8												0	0	173.4	80.4	86.7	23.8	12	131	90	136	93	136	94	4.37	2.87	0.97	2.09545	5.54
33033219	1	2	1	1	0	0	5	1	1					1	0	6	1	0	3	3	0										0	0	166.6	68.3	82	27.8	12	141	86	143	85	131	87	8.2	0.75	1.96	5.89909	5.68
33033220	1	2	1	1	0	1	3	0.5	3	2				1	0	9	1	0	5	1	0	0	30								1	0	163.8	68.7	85.2	28.4	14	126	80	124	77	131	71	5.72	1.37	1.25	3.84727	4.95
33033221	1	5	1	1	0	1	4	99.9	2					1	0	4	1	0	8	0	20										1	0	167.4	69.6	85.8	23.5	10	132	91	123	82	122	84	5.26	2.83	0.92	3.05364	3.93
33033222	1	1	1	4	0		5	99.9					7	1	0	6	1	0	8									1	0		0	1	161.2	58.2	75.7	22.2	9	154	77	145	75	146	79	5.69	0.54	1.64	3.80455	4.28
33033223	1	1	1	1	1	1	4	0.6	4					1	0	6	1	0	3	0	10										1	1	166.8	72.1	83.2	20.8	11	133	86	141	86	142	86	5.71	0.69	1.81	3.58636	5.84
33033224	1	1	1	1	0	1	6	99.9			1			1	0	8	1	0	2					0	20						0	0	160.8	61.8	80.2	21.8	11	133	84	134	82	130	79	6.59	1.12	1.53	4.55091	4.83
33033225	1	2	1	4	0	1	5	0.6			7			1	0	6	1	0	3					0	30						0	0	162.4	65.7	82.5	25.5	14	177	86	182	95	174	87
33033226	1	1	1	4	1		2	0.4			7			1	0	6	1	0	3					0	15						0	0	174.2	65.5	73.4	15.4	6	108	71	113	77	107	68	4.31	0.66	1.25	2.76	4.98
33033227	1	1	1	1	0	1	3	0.5		4				1	0	9	1	0	6			0	30								0	1	160.6	60.8	73.7	21.4	9	128	80	128	78	122	80	5.64	1.09	1.3	3.84455	4.45
33033228	1	1	1	4	0		2	99.9			7			1	8	0	1	0	3					0	30						0	0	157.4	72	93.4	31	21	130	80	135	83	134	80	5.52	0.75	1.36	3.81909	4.97
33033229	1	2	1	1	1	1	4	99.9		5				1	0	8	1	0	2			1	0								0	0	167.2	79.9	93.6	25.6	15	134	85	137	83	128	85	4.65	1.56	0.83	3.11091	5.04
33033230	1	1	1	4	0	1	2	0.4		2				1	1	0	1	0	5			0	30								0	0	157.4	53.7	75.2	24.1	9	126	73	125	70	124	73	4.59	0.54	1.24	3.10455	4.32
33033231	1	1	1	1	0		3	99.9			7		7	1	0	8	1	0	4					1	0			1	0	0	0	0	168.6	72.5	81.7	27.2	13	180	97	182	91	181	92	5.39	1.86	0.91	3.63455	5.34
33033232	1	2	1	1	1		3	99.9						1	0	8	1	0	6												0	0	160.6	53.8	64.9	18.3	6	112	66	120	66	127	69	4.94	0.43	1.54	3.20455	4.48
33033233	1	1	1	1	0		5	0.5						1	0	6	1	0	3												0	0	164.2	52.1	66.5	18.2	4	162	92	152	91	160	100	4.82	1.53	1.17	2.95455	5.38
33033234	1	2	1	4	0		4	0.5						1	0	6	1	0	3												0	0	168	79.1	86.5	29.7	16	134	82	124	82	125	80	5.68	3.03	1.11	3.19273	4.41
33033235	1	3	1	1	1	1	4	99.9			3			1	0	4	1	0	3					0	15					2	9	9	166.6	78	93.8	27.6	16	120	75	116	71	110	70	4	1.99	0.89	2.20545	5.99
33033236	1	3	1	1	1	1	3	0.6	3	2				1	1	0	1	0	5	1	0	1	0							2	0	0	165	80.1	93.8	26.5	17	143	99	146	95	141	95	5.19	1.33	1.19	3.39545	5.32
33033237	1	3	1	1	1	1	4	0.5						1	0	8	2	0	3												1	1	169	56.4	71.4	14.8	4	124	82	120	78	119	80
33033238	1	1	1	1	1	1	3	99.9						1	0	6	1	0	6												0	0	168.6	66.1	79.6	23.9	9	131	77	133	75	127	75	6.82	0.6	2.4	4.14727	5.2
33033239	1	3	1	1	0	1	5	99.9	1	1	2			1	0	8	1	0	2	0	30	0	20	0	20						0	1	170.6	67.2	83.2	24.5	9	115	73	106	72	109	72	6.33	1.12	1.47	4.35091	5.03
33033240	1	3	1	1	0		5	0.5						1	0	9	1	0	3												0	0	164	63.6	80.8	18.7	8	124	76	114	74	122	78	4.12	0.64	1.05	2.77909	4.31
33033241	1	2	3	1	0		4	0.5						1	0	8	1	0	3												0	0	160.4	55.8	74.8	15.3	6	114	74	114	73	115	75	6.6	0.96	1.44	4.72364	4.54
33033242	1	2	1	4	1		1	99.9						1	0	8	1	0	8												0	1	158.4	68.9	90.6	26.7	15	120	76	121	74	118	77	7.62	1.44	0.94	6.02545	5.2
33033243	1	3	1	4	0	1	3	1						1	0	6	1	0	5											2	0	1	167.4	89.6	101	29.5	19	166	97	165	105	164	98	4.93	3.1	1.24	2.28091	5.69
33033244	1	3	1	1	0		4	1						1	1	0	1	0	3												9	0	163.6	68	82.3	24.4	10	120	74	120	76	115	69	3.76	0.76	0.9	2.51455	5.09
33033245	1	2	1	4	0	1	2	0.8			7			1	0	5	1	0	3					0	30						0	0	161.8	67.1	85.8	26.9	13	118	79	125	85	114	80	6.02	3.59	1.03	3.35818	7.23
33033246	1	1	1	4	0		2	0.5		3				1	1	0	1	0	5			1	0							0	0	0	162.4	70.7	88	29	16	124	76	121	76	123	79	5.07	1.08	0.89	3.68909	6.18
33033247	1	1	4	1	0		6	0.5						1	0	6	1	0	3											2	1	1	166.8	72.7	90	27.3	14	169	97	172	100	173	106	5.97	2.33	0.84	4.07091	10.6
33033248	1	2	1	1	1	1	3	0.8	7	7	7			1	0	4	1	0	3	3	0	0	10	0	20						0	0	166.6	65.5	79.9	20.1	10	146	90	147	87	149	87	6.76	0.75	1.56	4.85909	6.41
33033249	1	4	1	1	1	1	2	99.9					3	1	1	2	1	0	2									0	30		0	0	169.6	75.9	94.9	33.3	8	119	77	111	67	117	75	4.99	6.98	0.66	1.31	4.74
33033250	1	2	1	1	1	0	2	99.9	7					1	0	8	1	0	3	2	0										0	0	171.6	55.7	69	14.9	3	125	86	119	76	128	78	4.35	0.8	1.25	2.73636	4.36
33033251	1	3	1	1	1	1	2	1					3	1	0	6	1	0	5									0	30		1	1	169.4	76.7	87.5	23.6	13	153	110	157	104	155	101	8.7	2.82	1.11	6.30818	5.74
33033252	1	2	1	1	1	1	3	0.5	3		3			1	0	9	1	0	5	1	0			0	30					2	0	0	175	78.6	97.4	23.1	11	130	76	127	78	125	77	3.9	1.72	1.27	1.84818	5.37
33033253	2	1	1	4	0		5	99.9						1	0	8	1	0	6												0	0	170.2	64.3	81.3	18.3	7	102	69	101	66	100	62	6.16	0.64	1.54	4.32909	4.78
33033254	1	3	1	1	1		4	99.9	7	2	7			1	0	5	1	0	3	5	0	1	0	1	0						1	1	160.4	60.5	74.3	16.9	9	101	64	102	66	101	67	5.86	1.17	1.37	3.95818	4.77
33033255	1	1	1	4	2		5	1		3				1	1	0	1	0	5			0	30								0	0	160.6	57.9	74.2	20.7	9	113	69	112	69	113	68
33033256	1	2	1	1	0	1	5	99.9	1					1	9	0	1	0	5	0	11										0	1	169	82	101	999.9	999.9	140	78	138	82	145	80	5.52	1.91	1.29	3.36182	8.68
33033257	1	3	1	2	0	1	2	1						1	1	5	1	0	4											2	0	0	166	62.8	95	35.1	11	151	71	146	69	149	64	5.72	1.39	1.15	3.93818	5.67
33033258	1	5	1	2	0	1	3	1						1	1	4	2	0	3												0	0	166.5	83.9	101.5	30.6	23	149	84	145	85	147	81	4.65	0.71	1.1	3.22727	5.41
33033259	1	2	4	4	0	0	2	0.9						1	1	3	1	0	2											2	0	0	165	70.5	100	999.9	999.9	174	74	166	72	170	73	6.43	0.88	1.29	4.74	5.62
33033260	1	4	1	2	0		2	0.9						1	1	2	1	0	6												0	1	175	58	75.5	21.1	4	131	88	129	83	131	82	6.24	0.89	1.79	4.04545	5.07
33033501	1	2	1	1	1		2	1.8		7				1	0	3	1	0	3			1	30								0	0	169.4	68.6	85.8	24.7	9	109	78	110	71	111	74	4.11	1.14	0.86	2.73182	4.84
33033502	1	3	1	1	0	1	3	99.9	7		7			1	0	6	1	0	5	2	0			1	0						0	0	169.4	67.5	81	23.6	9	133	77	128	76	126	76	5.44	1.24	1.22	3.65636	4.97
33033503	1	1	1	1	0		6	1.5			6			1	0	4	1	0	8					1	30						0	0	156	44.6	65	18.8	3	98	67	102	66	104	67	4.21	0.37	1.42	2.62182	5.22
33033504	1	2	1	4	0		3	1.2						1	0	6	1	0	8												0	0	158.4	55	83			138	73	139	73	133	69	5.54	1.11	0.83	4.20545	5.06
33033505	1	1	1	4	1	1	2	1	5		5			1	0	5	1	0	3	3	0			2	0						0	0	146.4	43.4	69.9	28.7	7	113	62	105	64	106	61	4.34	0.46	1.2	2.93091	4.47
33033506	1	1	1	4	1	1	2	0.5		1			3	1	0	9	1	1	2			0	30					0	20		0	0	165.8	62.7	83.4	22	10	122	60	122	63	122	66	5.01	0.84	1.1	3.52818	6.12
33033507	1	1	1	4	1		5	2	1	1	2			1	1	3	1	0	7	0	40	0	20	0	30						9	9	151.2	47.9	75	24.9	8	119	70	123	70	117	64	4.3	2.91	0.78	2.19727	4.52
33033508	1	2	4	4	1		3	0.4						1	0	6	1	1	5												0	0	167.4	51.7	69.3	18.8	5	108	52	101	54	104	55	4.41	2.06	1.04	2.43364	5.97
33033509	1	2	1	4	1		3	1.2		7	2			1	0	5	1	0	8			1	0	0	10					2	9	1	172.8	79	91.2	25.8	15	152	68	146	75	150	74	6.2	2.05	1.28	3.98818	5.25
33033510	1	1	1	4	1	0	2	1	7	3	7			1	2	0	1	1	0	5	0	1	0	1	0						0	0	151.2	51.7	71.2	25.5	11	136	62	134	62	128	60	3.42	0.52	1.04	2.14364	4.63
33033511	1	1	1	4	0		2	1.2						1	0	9	1	0	8											0	0	0	142.2	54.3	94.8	24.7	18	146	68	140	63	138	65	4.59	0.63	0.89	3.41364	4.62
33033512	1	1	1	4	0	0	2	1			1			1	0	5	1	0	2					0	10						0	0	157.6	51.3	78	26.8	7	147	54	139	57	144	59	5.91	2.17	0.91	4.01364	5.26
33033513	1	2	4	4	0		3	1.1						1	1	0	1	0	5												9	9	158.8	48.1	71.4	23.2	5	141	66	136	65	138	68	6.2	0.72	1.21	4.66273	4.93
33033514	1	2	1	4	0	0	3	1	3	2	7	1	1	1	1	0	1	0	8	3	30	4	0	0	40	0	30	0	20	2	0	0	169.8	66.8	87.3	28.3	10	128	82	126	81	124	80	4.73	0.97	1.11	3.17909	4.76
33033515	1	1	1	1	0		6	2.6	2	3				1	0	6	2	0	3	1	0	10	20								0	0	145.6	47.1	73.6	27.6	9	137	69	130	70	132	63	5.06	0.52	1.24	3.58364	4.6
33033516	1	2	1	1	1	1	4	2	7	7				1	0	9	1	1	0	8	0	0	30								0	1	173.8	66.5	71.2	40	9	120	69	121	68	118	69	5.5	0.45	1.86	3.43545	4.3
33033517	1	1	1	1	0	0	2	0.7			1			1	1	2	1	0	5					0	30						1	0	164	49.5	70	34.2	5.1	139	62	135	63	136	65	4.97	0.81	1.14	3.46182	4.69
33033518	1	1	1	1	0		3	7		6	6			1	0	5	1	0	2			8	0	0	10						0	0	165.3	71.8	83	22.7	13	129	80	120	82	125	81	6.58	2.42	1.48	4	6.03
33033521	1	1	1	4	1	1	2	1.1						1	1	0	2	0	8												0	1	172.8	65.3	83.8	21.2	8	119	64	122	69	118	66	3.94	1.58	1.2	2.02182	5.38
33033522	1	4	1	2	1		2	1.2					7	1	0	9	1	0	4									6	30	2	0	1	162.4	62	84	25.2	11	133	71	135	73	140	71	5.96	3.42	0.99	3.41545	5.43
33033523	1	3	1	1	0	0	7	1.5			1			1	1	0	1	0	8					1	0						1	0	158.2	49	69	15.2	5	115	73	115	72	112	75	5.85	0.93	1.52	3.90727	4.36
33033525	1	2	1	1	1	1	3	99.9						1	0	9	1	0	5												0	1	168.4	54.3	70.3	21.4	4	126	83	134	87	132	85	5.55	1.5	1.28	3.58818	4.39
33033526	1	2	1	4	1	1	3	1.4	7					1	0	8	1	1	5	8	45										0	1	178.2	73.2	81.5	17.3	8	122	78	118	75	116	77	5.52	1.03	1.44	3.61182	5.62
33033527	1	2	1	1	0	1	5	3.5		3	6			1	1	2	1	0	5			0	40	0	20					0	9	1	166	62.3	79	21.4	8	145	100	149	99	149	101	5.24	0.75	1.32	3.57909	5.04
33033528	1	2	1	1	1		3	1.4		7				1	1	0	1	0	5			2	0								0	0	170	57.7	76	55.4	5	108	65	106	68	105	66	4.49	0.43	1.26	3.03455	4.85
33033529	1	2	1	4	0		2	0.8						1	1	8	1	0	5											2	0	0	163	73.4	98.9	27.8	18	137	54	135	51	142	49	4.15	2.35	0.91	2.17182	6.49
33033530	1	1	1	4	1		3	1.5	7					1	1	0	1	0	5	8	0										0	1	166	62.6	85	21.4	8	113	74	114	71	108	69
33033531	1	2	1	1	1		3	1.4		7				1	1	2	1	0	5			8	0								0	0	159.8	52.6	79	20.6	6	119	71	122	69	111	67	6.1	1.14	0.94	4.64182	4.42
33033533	1	2	1	1	0	1	2	1		7				1	1	5	1	0	5			8	0								0	0	158.8	52.7	71	20.9	7	128	65	121	64	121	60	4.95	0.64	1.51	3.14909	7.28
33033534	1	1	1	1	0		5	2		7				1	0	6	1	0	3			6	0								0	1	164	59.4	79	121.1	8	135	79	136	76	129	74	5.21	0.29	1.53	3.54818	9.72
33033535	1	2	1	4	1		2	0.9			5			1	1	2	1	0	2					0	25						0	0	158.8	45.5	67	23.1	4	98	53	100	52	95	52	3.87	0.72	1.17	2.37273	7.27
33033536	1	1	4	4	0		1	99.9						1	0	6	2	0	8												0	0	155	62.6	82	23.1	11	141	91	147	95	141	95	3.3	0.73	1.13	1.83818	4.94
33033537	1	1	1	1	0		3	1		6				1	1	5	1	0	3			8	0								1	1	159	63.6	87.4	25.8	11	133	71	128	71	126	66	5.46	2.47	1.12	3.21727	4.84
33033538	1	1	1	4	1		2	0.5		4				1	0	6	1	0	4			5	0								0	0	165.1	67.7	86	23.8	12	107	68	104	68	107	69	5.69	1.75	1.08	3.81455	14.84
33033539	1	2	1	1	1		2	1	3	4				1	0	9	1	0	4	5	0	3	0							2	0	0	155.8	61.6	86	21.7	12	132	95	134	92	129	91	7.17	2.43	1.01	5.05545	4.62
33033540	1	2	1	4	1	1	4	99.9						1	1	2	2	4	2												0	0	159.8	61	79.6	21.4	10	142	79	142	79	137	75	5.06	0.75	1.84	2.87909	4.85
33033541	1	3	1	1	0	1	6	2.5	7	2				1	1	2	1	0	5	1	30	0	15								0	1	166.2	75.6	93	23.3	13	130	85	123	80	125	82	4.81	1.97	1.08	2.83455	4.47
33033542	1	2	4	4	0		4	1.5						1	0	8	1	0	6												0	0	165.6	63.5	86.6	25.8	9	128	78	127	73	127	77	5.05	1.29	1.21	3.25364	5.39
33033543	1	1	1	4	1		2	1.2		7				1	1	8	1	0	5			7	0								1	0	156	59.6	90	24.2	12	105	63	103	67	103	65	6.67	1.76	1.11	4.76	5.12
33033544	1	2	1	4	1	0	2	1						1	0	5	1	0	3												9	9	157	58.5	86	25.2	11	112	68	108	66	107	67	5.43	2.07	1.05	3.43909	4.93
33033545	1	1	4	1	2	1	2	1.6		5				1	0	3	1	0	4			2	0								9	9	164.6	64.9	90	22.1	11	107	77	104	75	111	73	3.15	0.35	1.17	1.82091	5.07
33033546	1	3	1	1	1		2	1.9		7				1	0	5	2	0	8			1	30							2	9	9	157	68.2	97.2	28.1	18	193	95	195	92	190	92	2.9	0.67	0.94	1.65545	4.93
33033547	1	1	1	1	1		6	2	5	2	5			1	0	5	1	0	4	8	0	1	0	0	15						9	0	158.6	58.9	85.8	29.4	10	102	62	108	60	107	62	4.72	1.21	1.06	3.11	5.11
33033548	1	1	1	1	0	1	2	0.8			6			1	1	5	2	2	0					1	30						0	0	159.3	54.7	76	17.5	8	140	71	134	71	137	73	5.9	0.5	2.35	3.32273	4.33
33033549	1	2	1	1	0		2	6		2	7		7	1	0	6	1	0	4			0	40	0	30			0	30		0	1	161.8	72.2	91.2	28.8	16	126	77	126	72	126	71	4.87	0.92	0.91	3.54182	5.17
33033550	1	2	1	4	1	1	2	0.9	7					1	0	8	1	1	0	9	0									2	0	0	166.8	72.3	92.8	25.9	13	134	89	127	85	129	88	6.31	15.73	0.33	1.52	6.01
33033551	1	1	1	4	0	0	4	2	1	7				1	0	7	1	0	3	5	0	2	30								0	0	165.4	60	72.8	17.1	8	120	77	122	78	118	60	6.55	0.75	1.41	4.79909	5.11
33033552	2	1	1	1	0		6	99.9		7				1	1	0	1	0	5			0	30								0	1	154.3	69.9	94.1	39.1	13	118	62	117	60	115	64	4.6	0.72	1.48	2.79273	5.81
33033553	2	1	1	4	0		2	0.9		5			6	1	0	6	1	0	4			0	30					0	30	2	0	1	164.6	69.8	95.8	999.9	999.9	121	72	123	74	117	73	5.28	1.06	1.54	3.25818	9.08
33033554	1	2	1	1	1		6	99.9	7					1	1	5	2	2	0	4	0										1	9	169.1	67.9	79.8	19.9	9	107	66	106	64	102	64	5.9	0.85	1.53	3.98364	4.19
33033556	1	3	1	1	0	1	3	1.5						1	0	5	1	0	7												0	0	167.6	77.2	90.2	24.6	14	119	70	116	75	111	72	4.21	0.5	1.54	2.44273	5.12
33033557	1	3	1	1	2		2	0.8		3				1	0	7	1	0	2			0	30								0	1	162.8	67	82	21.1	11	109	56	109	55	106	55	4.11	0.57	1.33	2.52091	4.42
33033558	1	2	1	1	1	1	99	0.5	7		7			1	7	0	1	1	2	9	50			1	0						0	0	160	59.6	78.8	21.4	10	116	71	120	70	120	68	5.53	0.62	1.8	3.44818	5.5
33033559	1	3	1	1	1		3	1.3		6				1	0	6	1	0	3			8	0								1	0	161.8	62.4	81.8	24.5	10	117	65	111	62	113	63	6.4	2.47	0.96	4.31727	10.14
33033560	1	2	1	1	0	1	7	2.2		7				1	1	2	1	0	5			8	0								0	0	161.9	64.2	85	24.1	12	135	74	130	78	128	75	4.78	0.55	1.54	2.99	5.19
33033561	1	1	1	1	0		3	1.5		5				1	0	7	1	0	4			0	20								1	1	161.1	57.9	75.8	16.3	8	109	69	110	65	112	66	4.23	0.45	1.62	2.40545	5.57
33033563	1	4	1	1	0	1	6	2.8					7	1	0	8	1	0	2									0	10		0	1	175.6	70.5	80.2	24.3	8	131	79	134	82	129	80	3.68	1.86	1.01	1.82455	4.9
33033564	1	2	1	1	0	1	6	3						1	0	7	2	0	9												1	0	161	65.6	86	27.8	13	146	88	148	83	142	85	4.41	1.03	1.25	2.69182	6.41
33033565	1	1	4	1	0		1	0.6		5	7			1	2	2	1	0	5			0	30	0	30					2	0	0	154.5	55.5	81	30.9	12	143	71	145	70	140	75	3.97	2.18	0.8	2.17909	5.03
33033566	1	2	1	4	2		3	1		2				1	0	6	1	0	3			2	0							2	9	9	163	57.2	77	23.2	8	129	72	126	69	127	70	5.04	0.79	0.97	3.71091	6.13
33033567	1	2	1	4	0		3	1		5			7	1	1	5	1	1	5			2	0					0	20		0	0	171	74.1	90	27.3	12	138	74	130	76	131	78	6.23	2.18	1.27	3.96909	5.62
33033568	1	2	1	1	0		5	1.5	7					1	1	0	1	0	1	8	0									0	0	0	157	49.8	71	18.8	6	170	84	175	78	172	76	3.48	0.51	1.37	1.87818	3.87
33033569	1	2	1	4	1	1	3	0.5						1	1	5	1	0	6												0	0	172.5	71.9	88	26.4	11	114	64	113	61	111	61	5.78	1.37	0.98	4.17727	4.67
33033570	1	1	4	4	1	1	1	0.6		7	7			1	0	5	1	0	3			1	30	0	30					2	0	0	155.5	46.5	69	23.6	8	130	76	131	74	138	70	4.38	0.65	1.27	2.81455	4.95
33033571	1	1	1	1	0		2	0.9		3				1	1	0	1	0	3			0	30								0	0	155	41.5	55	21.8	2	148	82	142	83	140	80	5.5	0.5	1.36	3.91273	4.2
33033572	1	1	4	1	1	0	2	1		2	7			1	0	6	3	0	4			1	30	0	30						0	0	156	61.4	86	27.1	13	122	79	129	77	128	77	6.4	1.11	1.41	4.48545	5.33
33033573	1	1	1	4	0		1	0.6		5	3			1	1	2	1	0	3			0	20	0	30					2	9	9	154.5	62.4	89	32.6	17	137	63	135	62	130	62	5.18	1.87	0.92	3.41	5.2
33033574	1	1	1	4	0	0	2	1			2			1	0	8	2	0	6					0	30						0	0	156.5	55.9	79	23	11	134	68	136	67	131	64	4.19	0.35	1.15	2.88091	5.1
33033575	1	3	1	4	1	0	2	1		7				1	0	6	1	1	5			10	0								1	0	164	63.4	85	22.6	9	108	70	106	72	104	68	6.21	3.3	0.83	3.88	4.74
33033576	1	1	1	1	0		2	1.2						1	1	2	1	0	3												0	9	161	68.9	90	24.6	13	129	81	123	80	129	81	4.07	1.23	1	2.51091	4.73
33033577	1	1	0	1	1	1	2	0.9		5				1	0	5	1	0	3			0	30								0	0	189	58.8	71	7.9	1	115	72	106	72	107	68	3.26	0.24	1.9	1.25091	5.74
33033578	1	2	1	4	1	0	2	0.8						1	1	2	1	0	6												0	0	168.5	69.8	91	29.2	14	114	72	112	71	116	71	4.91	1.94	0.87	3.15818	4.59
33033579	1	1	4	4	0	0	2	1		7	7			1	0	3	1	0	3			2	0	0	15						0	0	149.5	43.8	69	17.8	5	152	97	150	93	148	92	3.46	0.72	1.43	1.70273	5.86
33033580	1	2	1	4	1	1	2	1.5	7		3			1	0	7	3	0	4	7	0			0	20						0	1	170.5	54.5	68	10.3	3	123	69	117	65	118	64	6.37	0.94	1.79	4.15273	6.17
33033581	1	2	1	4	1		2	0.8		3	4			1	0	5	1	0	4			2	30	0	30					2	0	0	158	4.9	90	26.8	16	128	65	126	61	124	60
33033582	1	2	1	1	1		3	1.6			7			1	1	6	1	1	0					6	0						0	1	163	63.4	82	23.2	10	103	67	107	68	105	66	4.41	0.94	0.95	3.03273	4.65
33033584	1	2	1	1	0		2	99.9						1	0	6	1	0	4												0	0	164	61.1	78	21.6	10	141	78	138	76	139	75	4.22	0.49	1.2	2.79727	6.02
33033585	1	1	1	4	1		2	0.9	7					1	0	9	1	1	5	9	0										0	0	169.8	51	74.8	16.7	2	99	59	98	60	89	59	4.04	0.29	1.29	2.61818	4.71
33033586	1	1	1	1	1	0	2	1						1	0	5	1	0	5											2	9	1	173	81.9	96.8	28.3	15	135	83	130	79	127	80	4.53	0.93	0.98	3.12727	6.93
33033587	1	2	1	4	0		2	99.9			2			1	0	8	2	0	5					0	20					2	0	0	157.4	50.9	78.2	15.1	7	141	72	143	69	141	68	3.79	0.69	1.25	2.22636	7.09
33033588	1	2	1	4	0	1	2	1		6				1	0	5	1	0	3			2	0								0	1	156	46.8	77	2	40	119	73	123	70	120	68	5.44	0.41	1.92	3.33364	5.34
33033589	1	3		1	1	1	2	1	1	7				1	0	3	1	1	5	0	20	8	0								0	1	160.4	56.1	78.2	21.5	7	128	73	121	69	120	68	3.94	0.5	1.03	2.68273	4.95
33033590	1	1	1	1	0	1	3	1.5						1	1	0	1	1	0												0	0	166.4	69.5	87.2	21.6	11	128	84	131	79	136	80	4.93	0.65	1.16	3.47455	6.67
33033591	1	2	2	1	0		2	1						1	0	9	2	1	5												0	0	168.4	59.8	73.2	13.2	6	115	73	121	74	119	71	3.86	1.17	1.11	2.21818	5.15
33033592	1	1	1	4	1	1	2	99.9						1	0	5	2	0	5												9	9	157.6	59.5	88	29.8	12	120	67	128	68	127	63	4.8	2.45	0.87	2.81636	5.6
33033593	1	2	1	1	0	1	3	1.2		7				1	0	5	1	0	3			6	0								0	9	167	59.7	75.6	17.4	6	122	82	120	77	118	78	4	2.02	1.33	1.75182	5.96
33033594	1	2	1	1	0		2	1.5		4				1	1	0	1	2	0			8	0							2	9	0	166.4	57.2	75.4	18.7	6	119	82	118	80	117	78	4.6	0.46	1.74	2.65091	5.49
33033595	1	2	1	2	1		1	0.6		7	4			1	0	7	1	0	4			0	20	0	30					2	0	0	176.2	79.9	102	29.5	14	129	76	133	73	129	72	6.07	4.57	0.85	1.15	4.46
33033596	1	2	1	1	0	1	5	99.9	4					1	1	0	2	0	5	7	0										0	0	162.8	73.7	90.4	27.2	17	121	70	121	68	120	68	4.74	0.5	1.25	3.26273	5.13
33033597	1	1	1	4	0		2	1						1	0	8	1	1	5												0	0	159	51.1	67	28	7	120	54	123	50	120	55	4.06	0.56	1.43	2.37545	5.27
33033598	1	2	1	1	0		3	1.5		6				1	0	6	1	0	5			9	0								0	0	164.2	59.2	79.2	23.2	7	132	78	126	82	130	76	6.43	0.39	1.63	4.62273	5.6
33033599	1	3	1	4	1		10	4						1	1	0	1	0	6												0	0	166.8	67.8	83.8	29.6	10	152	89	146	87	146	87	5.85	0.96	1.62	3.79364	4.63
33033600	1	1	3	4	0		1	0.6		7	4			1	1	0	2	1	0			0	10	0	50					0	0	0	153	52.5	79.8	24.7	10	183	72	180	70	182	72	4.62	1.85	0.92	2.85909	5.81
33033601	1	1	1	1	1		2	1						1	0	8	0													0	0	0	158.7	68.6	98.2	30	17	167	94	164	99	166	96	4.37	1.66	1.34	2.27545	5.45
33033602	1	3	1	1	1	1	3	1		7				1	0	5	1	1	0			8	0								0	0	158	54.8	69.8	16.4	8	104	65	104	60	107	61	5.7	1.39	1.46	3.60818	4.75
33033603	1	3	1	1	1	1	5	2.6		5				1	0	9	1	0	3			0	30								9	9	162.2	67.8	85.6	24.6	12	120	82	124	77	119	83	3.97	0.46	1.13	2.63091	5.44
33033604	1	2	1	1	1	1	4	2	7					1	0	5	1	0	5	10	0										0	0	169.4	68.5	78.4	23.1	9	114	68	109	68	107	64	5.6	2.42	1.29	3.21	4.9
33033605	1	2	0	1	1		4	2		5				1	1	3	1	0	5			0	40								1	0	172.5	56.8	64.8	12.2	3	115	75	109	73	111	70	3.91	0.94	1.14	2.34273	4.54
33033606	1	1	1	1	1	1	5	2	7	7				1	1	1	2	0	5	0	20	8	0								0	0	157.8	54.5	71.2	22.1	8	113	71	112	75	105	76
33033607	1	1	1	4	0		3	1.2		3	5			1	1	1	1	0	5			0	30	0	30					2	9	9	164	76.2	89.8	29.4	18	153	87	152	89	147	85	3.57	0.89	1.09	2.07545	5.48
33033608	1	1	0	4	0		1	0.6						1	0	5	1	0	3												0	0	174.4	165.5	78.8	13	6	140	80	131	81	132	78	3.68	0.28	1.31	2.24273	5.07
33033609	1	2	1	1	1	1	3	1.4						1	0	1	3	0	8												0	1	170.4	67.9	78.8	17.4	8	115	76	111	72	112	74
33033610	1	3	1	1	1	0	3	1.3		7				1	0	6	1	0	3			8	0								0	0	164.2	64.3	81	23.1	9	123	81	123	80	121	84	5.41	2.34	1.05	3.29636	5.54
33033611	1	2	1	2	2		2	1		3				1	0	7	1	0	3			0	30								9	9	156.5	62	88	30.2	15	122	74	118	72	120	70	4.55	0.89	0.99	3.15545	5.58
33033612	1	2	1	1	0	0	2	1		3				1	0	6	1	0	4			1	30								0	0	146	46.8	78	20.5	10	152	69	156	70	159	68	4.67	0.65	1.51	2.86455	5.48
33033613	1	1	1	4	1		2	1.2		5	3			1	1	2	1	0	5			0	30	0	30					2	0	0	149	40	65.4	29.5	4	121	67	121	68	124	69	5.18	0.96	1.34	3.40364	5.44
33033614	1	2	1	4	0	0	2	0.9						1	0	9	1	1	0												0	0	151.6	62.4	91.8	29.4	19	131	63	134	60	130	62	5.43	1.09	1.25	3.68455	5.31
33033615	1	5	1	1	1		2	1						1	0	6	1	0	5												1	0	171.5	72.7	92.8	24.6	10	133	84	131	89	130	84	6.02	0.82	1.12	4.52727	5.9
33033616	1	1	1	4	2	1	2	1.1						1	0	5	1	0	3												9	9	161	47.3	72.8	28.6	4	154	73	162	77	159	75	4.24	0.43	2.06	1.98455	5.54
33033617	1	1	1	1	1		3	1.3		3	7			1	0	7	1	0	4			2	30	0	30						0	0	147.5	52.6	80.4	21.2	12	114	82	109	83	106	83	3.99	1.97	0.97	2.12455	5.9
33033618	1	2	1	1	0		2	0.5						1	1	0	1	1	2											2	0	1	164	76.4	95.8	26.4	18	148	101	152	94	156	101	4.86	2.19	0.91	2.95455	5.83
33033619	1	2	1	1	0	0	2	2	6		7			1	1	2	1	1	2	8	0			0	30						0	0	167	57.4	71.2	16.3	6	128	93	126	87	123	91	4.14	0.34	1.49	2.49545	5.44
33033620	1	1	1	4	1		2	1						1	1	1	1	0	3											2	0	0	163.2	60.5	87	999.9	999.9	137	69	132	65	129	63	4.02	1.63	0.82	2.45909	9.72
33033621	1	3	1	1	1	1	4	2	2					1	0	5	2	1	0	3	0									0	0	1	164.4	62.9	84.4	19.4	9	137	94	131	93	131	92	5.75	0.89	1.76	3.58545	5.08
33033622	1	2	1	4	0		2	1.2			1			1	8	0	1	0	3					2	0					2	0	0	147.4	54.9	83.3	32.3	16	138	78	138	73	130	70	5.04	0.54	1.22	3.57455	5
33033623	1	2	1	1	1	1	4	1.5			3			1	0	9	1	1	0					0	20						0	0	152.4	65.5	101	31.5	16	117	75	120	72	119	72	4.99	1.83	1.1	3.05818	6.71
33033624	1	3	1	1	1	1	2	1		7	7		3	1	0	6	1	0	5			6	0	0	10			0	30	0	0	0	178.8	79.2	94.4	25.9	12	142	94	142	98	137	93	3.96	0.68	1.17	2.48091	4.83
33033625	1	2	0	1	1		3	1.5		4				1	1	3	1	0	5			0	30							2	0	1	157.2	62.2	85.7	19.6	11	155	110	150	108	148	107	2.86	1.55	0.68	1.47545	5.14
33033626	1	1	1	4	0	1	2	1.3		4	4			1	1	2	1	0	6			0	30	0	30						9	9	159	67.1	93	27.6	16	130	75	131	69	131	69	5.18	2.26	1.02	3.13273	4.84
33033627	1	2	1	1	0	1	3	0.4						1	0	8	1	0	4												1	0	164.6	76.7	95.2	26.1	15	126	88	123	88	120	83	5.74	11.31	0.21	2.63	5.55
33033628	1	1	1	1	2		4	1.2	7					1	0	9	1	0	5	0	30										0	0	158.2	61.2	93.4	999.9	999.9	125	82	123	79	126	81	4.65	0.85	0.94	3.32364	5.88
33033629	1	1	1	1	0		2	1	6					1	0	4	1	0	3	9	30										0	0	160.8	53.5	71	17.6	6	111	74	119	74	111	75	3.66	0.62	1.26	2.11818	6
33033630	1	3	1	1	2		6	2		5	5			1	0	6	1	1	3			8	0	3	20						0	0	140.8	44.3	74.7	33.2	10	107	68	112	66	108	66	4.39	0.72	1.46	2.60273	4.3
33033631	1	2	1	1	1	1	5	2.3		5				1	1	0	1	0	2			0	30								0	1	167.4	69.4	89	23.3	10	127	81	130	86	122	87	2.75	0.94	1.04	1.28273	5.89
33033632	1	2	1	4	0		2	99.9						1	1	0	1	0	3												0	0	158.6	50.1	77.8	27	6	159	81	164	81	155	78	3.38	0.43	0.92	2.26455	4.74
33033633	1	3	1	1	0		3	99.9		3				1	0	8	1	0	4			9	0								0	0	169	71.8	84	21	10	122	78	118	71	115	70	4.86	0.58	1.36	3.23636	6.07
33033634	1	2	1	1	0		6	3		7				1	1	5	1	0	5			0	30								0	0	167.8	58	74	16.4	6	117	64	116	67	116	66	3.83	0.3	1.72	1.97364	5.31
33033635	1	2	1	4	1		4	1.6	7					1	1	5	1	1	5	8	30										0	0	169	64.7	81.6	25.1	9	127	76	133	79	129	71	4.55	0.41	1.3	3.06364	5.32
33033636	1	2	1	1	1	1	4	1.4		4	3			1	0	6	2	1	5			0	15	0	30						0	0	159.8	47.4	66.2	13.7	4	107	68	105	67	108	65	2.94	0.29	1.47	1.33818	6.92
33033637	1	1	1	1	0	1	2	1.2		5	7			1	1	2	1	0	3			0	30	0	20					0	1	1	165	66.1	83	24	12	132	89	135	88	131	84	4.5	0.58	1.3	2.93636	5.99
33033638	1	3	1	4	0		3	1.3		1			3	1	0	6	1	0	4			0	20					0	15		0	0	162.8	62.8	83.6	21.4	9	123	88	128	75	123	78	3.17	1.87	0.87	1.45	5.63
33033639	1	2	1	1	1	1	5	99.9	5					1	1	5	2	0	5	8	0										0	0	160.4	57.5	78.8	16.9	8	105	66	106	67	104	67	3.6	0.3	1.53	1.97909	5.18
33033640	1	1	1	4	0		2	1		7				1	0	6	4	6	0			1	30								9	0	147.8	53.6	87	999.9	999.9	109	70	105	72	111	69	4.7	0.44	1.34	3.16	7.01
33033641	1	2	1	1	0		2	1.2		7	5			1	1	0	1	0	6			0	30	0	20						0	0	164.6	58.6	75.5	21.5	9	144	84	149	84	142	84	3.22	0.29	1.32	1.76818	5.45
33033642	1	2	1	1	0		2	1		6				1	0	5	1	0	3			5	0								0	0	156.8	60.4	85.4	24.2	12	117	73	118	68	115	68	5	0.72	1.21	3.46273	5.51
33033643	1	2	1	1	0	1	6	3.6			5			1	0	8	1	0	4					0	30						1	0	152.4	48	78	27.8	6	117	70	114	67	116	66	4.61	0.23	1.46	3.04545	8.73
33033644	1	2	1	1	0		5	2.7	7	7				1	0	5	1	0	4	4	0	2	30								1	0	170	66.6	81.8	22	9	131	69	125	68	130	69	4.27	0.56	1.04	2.97545	6.16
33033645	1	1	1	1	1		5	2.5		7				1	1	2	1	0	2			0	30								0	1	158.2	66.2	86.8	24.1	15	118	75	122	73	116	69	5.23	1.46	1.87	2.69636	7.56
33033646	1	2	1	4	0		3	1.5		3				1	1	5	2	0	3			0	40							2	0	0	166	72.2	88	23.6	13	116	80	117	83	116	82	4.96	2.81	0.98	2.70273	6.01
33033647	1	2	1	4	1	1	2	0.9						1	0	7	1	1	0												0	0	154	62.7	89	34.1	14	123	77	118	78	123	77
33033648	1	2	1	1	0		3	1.6		7				1	1	3	1	0	5			0	30							2	0	0	164.4	72.7	92.4	29	15	126	93	129	98	120	95	3.83	1.36	0.84	2.37182	5.3
33033649	1	1	0	4	1	1	3	0.5						1	0	5	2	0	3											2	0	1	144.6	30.9	60.6	999.9	999.9	131	72	138	78	131	75	3.37	0.94	1.11	1.83273	4.23
33033650	1	2	1	1	2		3	1.5					7	1	0	7	2	0	5									0	20		0	0	166.6	61	86	20.2	8	111	76	116	79	115	78	6.26	1.24	1.51	4.18636	4.68
33033651	1	1	1	1	0		2	1		7	5			1	1	4	1	0	5			0	30	0	30					2	0	1	166	65	81.5	20	10	129	85	132	85	126	84
33033652	1	1	1	4	0		2	0.8		1				1	0	8	1	1	0			2	0							2	9	9	150.6	52.5	80	999.9	999.9	148	69	155	72	147	68	5.09	0.27	1.35	3.61727	5.47
33033653	1	1	1	4	0		2	1.3		5				1	1	2	1	0	6			0	30							2	0	0	165.4	65.3	83.4	29.7	12	135	71	133	71	135	72	5.05	1.15	0.96	3.56727	6.49
33033654	1	2	1	4	1	1	2	1		1	7		7	1	0	6	2	1	0			2	0	0	30			1	0		9	9	160.6	61.3	87.3	27.3	12	156	89	156	86	150	86	6.06	0.94	1.57	4.06273	5.21
33033655	1	1	1	1	0		2	1.2		7				1	1	2	1	0	4			0	30							0	1	0	162	57.2	77	23	8	132	86	129	82	129	82	4.92	0.79	1.12	3.44091	4.96
33033656	1	1	1	4	1	1	2	0.8						1	0	6	2	1	0												0	0	165	65.7	90	999.9	999.9	115	72	117	70	115	69	4.84	1.32	0.91	3.33	5.33
33033657	1	2	2	4	0		2	1					5	1	1	0	2	0	5									0	20		0	0	162.2	73.6	104	32.6	19	131	93	138	90	131	88	6.89	0.62	1.42	5.18818	4.81
33033658	1	1	1	1	0	0	2	0.9		1				1	1	0	1	1	2			3	0							2	0	0	156.2	58.3	82.2	24.1	12	138	77	142	79	143	74	5.58	1.29	1.42	3.57364	5.59
33033659	1	2	1	1	0	1	4	2	6					1	0	8	1	0	5	5	0										0	0	150.8	44.3	65.1	12.2	4	109	67	104	67	102	72	4.24	0.23	1.85	2.28545	4.94
33033660	1	1	1	4	1	1	2	0.9		1				1	1	0	1	1	0			1	0							2	9	9	154.8	49.8	74.2	999.9	999.9	122	69	123	68	121	66	5.4	1.24	0.87	3.96636	6.08
33033661	1	2	0	4	0		2	0.6			2			1	0	7	1	0	3					0	20					0	1	0	158	64.3	91	25.9	12	156	109	158	109	157	106	4.29	0.47	1.68	2.39636	5.1
33033662	1	2	1	1	0	1	3	1.2		7				1	1	2	1	1	2			5	0								0	9	165	63.6	85.3	24.5	11	130	78	122	78	121	73
33033663	1	1	4	4	1	1	1	0.4						1	1	0	2	0	7											2	0	0	157.6	59.5	83.4	22.6	12	151	78	143	76	145	74	4.52	0.74	1.11	3.07364	4.77
33033664	1	1	1	4	0	1	2	0.5		5				1	0	5	0					0	30							2	0	0	159.2	57.1	81.8	20.6	10	116	71	121	64	112	62	5.8	0.51	1.52	4.04818	4.82
33033665	1	1	1	1	1		5	3	5	7	7		6	1	0	8	1	0	3	4	0	1	30	0	30			1	0	2	0	0	155	56.1	78.4	26	12	126	82	120	78	121	69	5.82	1.64	1.15	3.92455	5.67
33033666	1	2	1	1	1		2	0.8		7	7			1	1	6	1	0	5			5	0	0	40						0	0	157	52.9	69.5	17.2	8	120	68	124	64	121	68	4.66	0.89	1.28	2.97545	4.61
33033667	1	2	1	4	0	1	2	1.2		7	7			1	0	6	3	1	0			3	0	0	10						0	0	167.6	65.8	82.8	21.5	10	124	82	127	83	131	81	4.39	0.86	1.82	2.17909	6.42
33033668	1	3	1	1	1		3	1.5		7				1	0	8	1	0	4			5	0								0	0	172.8	64.6	75.4	15.3	6	109	73	112	75	105	69	5.9	0.39	2.23	3.49273	5.73
33033669	1	1	1	1	0		1	0.4		7				1	0	3	1	0	2			7	0								9	9	146	43.7	78.2	15.8	7	87	54	83	48	88	54	4.73	0.32	1.57	3.01455	6.28
33033670	1	1	1	4	0		2	1.6		5				1	1	3	1	0	5			0	30							2	0	0	168.6	71.9	93.8	26.8	14	112	73	118	74	120	73	5.51	1.52	1.06	3.75909	5.86
33033671	1	1	4	1	0		10	4		7	7			1	0	8	2	0	7			2	0	0	30						9	9	148.6	48.1	82.3	999.9	999.9	125	61	128	62	129	59	5.2	0.66	1.42	3.48	5.21
33033672	1	1	1	4	1		2	0.9		7				1	1	2	1	1	5			3	0							0	0	0	166.8	70.9	85.6	28.8	15	145	85	142	94	147	89	5.2	0.73	1.21	3.65818	4.61
33033673	1	2	1	1	0	1	4	2	5					1	0	5	2	0	6	6	0										1	0	160.8	70.8	83	20.6	13	108	68	112	65	109	65	4.58	0.79	1.28	2.94091	5.23
33033674	1	3	1	4	0		2	0.8		7				1	1	0	1	1	0			2	0							2	0	0	148	64.2	96.2	29.5	22	122	68	131	73	130	78	6.56	1.09	1.31	4.75455	5.52
33033675	1	2	4	4	0	1	1	0.6		5	3			1	1	0	1	0	3			0	20	0	30						0	0	153.8	53.3	85	999.9	999.9	132	83	134	87	127	84	4.96	0.87	1.08	3.48455	4.67
33033676	1	1	1	4	0		2	0.7		3				1	0	4	1	0	2			2	0								9	9	152.2	53.5	82.4	999.9	999.9	115	65	114	67	109	63	4.2	0.68	1.2	2.69091	4.91
33033677	1	1	1	4	1		2	0.8		3	1			1	1	0	1	1	0			6	0	0	20					2	0	0	154	51.8	80.5	20.1	9	133	71	139	70	137	65	5.28	0.87	1.6	3.28455	5.23
33033678	1	2	1	4	0		6	3.3		3	3			1	1	3	1	0	6			0	40	0	30						0	0	177	82.2	96.2	28	16	112	63	112	62	111	61	5.55	0.9	1.12	4.02091	8.05
33033679	1	3	1	1	1		3	1.7		5				1	1	2	1	0	4			0	30								0	1	164	49.1	64.4	11.5	3	107	72	108	69	105	65	3.85	0.78	1	2.49545	4.85
33033680	1	1	4	1	1		1	99.9		7	7			1	0	8	1	0	5			1	30	1	0					2	0	1	153	55	81.2	999.9	999.9	132	64	131	64	130	63	3.03	0.54	1.3	1.48455	7.33
33033681	1	1	1	1	1		4	2.2		5				1	1	2	1	0	5			0	30								0	1	162.6	51.7	73.4	16.2	7	124	64	118	63	119	64	4.15	0.34	1.06	2.93545	5.07
33033682	1	2	1	1	0	1	5	3		7	2		7	1	0	7	1	0	4			5	0	0	20			0	30	2	0	0	152	49	78	17.3	5	126	90	126	89	126	84
33033683	1	2	1	1	1	1	2	0.8		7	1		7	1	0	6	1	1	5			2	0	0	30			0	20		0	0	161	49.2	75.2	19.8	4	127	69	133	72	124	77	3.55	0.26	1.13	2.30182	4.17
33033684	1	2	1	4	1		2	1.5						1	1	0	2	0	6											2	0	0	167.3	70.6	83.5	27.5	13	122	76	114	72	112	73	3.51	0.89	1.4	1.70545	4.75
33033685	1	2	1	1	1	1	2	1.2		7				1	1	5	1	0	4			0	30							2	1	0	154.6	47.8	65.4	17.4	6	149	91	144	84	144	86	3.87	0.36	1.88	1.82636	4.97
33033686	1	2	1	1	1		2	0.8		5			6	1	1	3	1	0	8			1	0					0	30	2	0	0	162.4	76.4	102.6	32.1	20	128	73	131	69	124	70	3.93	0.56	1.14	2.53545	4.58
33033687	1	2	1	4	2	0	2	0.8						1	1	2	2	0	5												0	1	170.1	66.2	81.2	188	9	114	74	112	72	111	68	3.85	2.02	0.72	2.21182	4.83
33033688	1	1	1	1	1	1	3	1						1	0	6	1	0	6												0	9	159.6	59.6	73	14.1	9	102	64	104	64	105	61	2.88	0.4	1.33	1.36818	6.69
33033689	1	1	1	1	1		2	1.5			7			1	1	6	2	0	2					0	30						0	0	160.6	71.7	90	28.8	14	134	77	141	76	135	82	2.7	0.61	0.96	1.46273	4.83
33033690	1	2	1	1	1		6	3.5	7					1	0	5	2	0	2	2	0										0	1	167.5	61.8	77.2	19	8	128	79	132	81	135	74	2.78	0.34	1.17	1.51455	5.36
33033691	1	2	1	1	1	1	2	5.1	4					1	1	0	3	0	2	3	0									0	1	0	171.1	67.6	76.6	18	9	155	95	155	95	148	88	3.47	0.3	2.37	0.963636	7.86
33033692	1	2	1	1	1		2	99.9			7			1	1	0	1	0	4					1	0						1	0	157.2	60.8	82.2	21.5	13	109	69	103	68	105	64	5.18	0.59	1.02	3.89182	5.49
33033693	1	1	1	4	1	1	2	1						1	0	8	2	0	4											2	0	0	162.1	72.5	88.2	28.1	18	137	73	141	71	137	73	3.33	1.12	1.02	1.80091	5.75
33033695	1	1	1	1	1	1	6	1.6			6			1	0	8	1	0	3					0	30						0	0	159.8	59.4	78.7	23.5	11	109	63	105	58	107	56	4.61	0.32	1.5	2.96455	5.42
33033696	1	3	1	1	1	1	3	99.9						1	0	5	3	0	5												1	0	167	73.6	86	24.2	12	142	93	139	94	138	90
33033697	1	2	1	1	0		2	1		2	7		7	1	0	6	2	0	4			2	0	0	20			0	30	2	0	0	164.1	71.8	95.2	31.7	17	123	73	118	71	122	66
33033698	1	1	4	4	0		3	1.3						1	1	0	1	0	3											2	0	0	160.3	59.5	87.2	999.9	999.9	129	74	128	66	130	71	5.86	1.39	1.25	3.97818	5.45
33033699	1	2	1	1	0		3	1.6		2			2	1	0	6	1	0	3			1	0					0	30		1	0	171	65.4	77.2	21.4	9	119	69	119	70	118	63	3.97	0.7	1.64	2.01182	5.25
33033700	1	1	1	1	0		2	1			7		6	1	0	6	1	0	3					1	0			0	40	2	1	1	164.8	65.7	82	23.6	12	154	79	150	82	152	80	4.74	0.43	1.12	3.42455	5.67
33033701	1	2	1	1	0	1	3	1.1		7				1	0	6	1	1	0			6	0								1	0	166.6	53.5	64.4	9.7	4	103	62	100	58	99	61	5.14	0.53	2.32	2.57909	6.88
33033702	1	2	1	4	1		2	1			2			1	0	7	1	0	4					0	10						0	0	159.8	60.6	86.4	27.5	12	137	91	140	89	131	86	6.22	1.78	1.45	3.96091	14.32
33033703	1	1	1	1	0		4	99.9						1	1	0	1	0	7												0	0	168.2	57.2	79.4	22.8	10	98	70	97	74	95	71	3.72	0.78	1.27	2.09545	5.16
33033704	1	1	1	1	1		2	1.1					2	1	0	2	1	0	3									1	20		0	0	176.5	65.4	74.2	18.5	6	137	84	135	79	133	77	4.02	1.17	1.07	2.41818	5.62
33033705	1	2	1	4	1		2	99.9			7			1	0	8	1	0	2					0	30						0	1	161.2	53	72.6	24.6	7	136	83	131	79	131	78	3.62	0.7	1.24	2.06182	5.17
33033706	1	1	4	4	1		1	0.6		7	5			1	1	0	1	0	3			0	20	0	30					2	0	0	155.2	55.5	83.4	25.4	11	172	76	164	76	167	75	4.82	0.54	0.84	3.73455	5.28
33033707	1	3	1	1	1		5	3		3			7	1	0	6	1	0	4			5	0					1	0		9	9	160.7	67.5	92.4	30.7	15	148	80	151	80	143	81	4.69	0.66	1.11	3.28	6.1
33033708	1	2	0	1	1	1	1	99.9						1	0	8	1	0	2												0	0	157.8	56.4	83.4	24	8	167	105	158	97	160	95	4.11	0.28	1.78	2.20273	7.11
33033709	1	2	1	1	2		5	1			2			1	0	8	1	0	8					0	30						0	1	160	54.2	68.8	14.8	6	104	69	101	63	97	63	4.59	0.23	1.68	2.80545	5.25
33033710	1	3	1	1	2		3	99.9						1	1	0	1	0	2												0	0	160.8	61.3	78.4	23.9	9	140	81	138	82	137	79	4.96	1.42	0.91	3.40455	6.24
33033711	1	2	1	1	1		3	99.9						1	1	0	1	0	2												0	1	168.8	52	67.5	21.3	3	120	79	117	76	112	74	3.79	0.96	0.96	2.39364	4.91
33033712	1	2	1	1	0	0	3	0.8	3		7		7	1	0	8	2	0	6	2	0			0	15			0	15		0	0	166.2	57	77.8	19.5	6	129	87	134	85	131	89	3.79	0.24	1.54	2.14091	5.28
33033713	1	2	1	1	1	1	8	99.9				2		1	1	0	1	0	2							1	0			0	0	1	174.4	88.4	95.6	27.3	15	121	90	118	88	123	88	4.33	1.35	1.18	2.53636	6.38
33033714	1	3	1	1	1	1	4	99.9						1	1	0	1	0	7												0	0	173.8	55.2	70.4	11.5	2	114	68	110	71	111	66	4.85	2.05	1.09	2.82818	4.83
33033715	1	2	1	4	1	1	4	99.9					3	1	1	2	2	0	6									0	30	0	0	1	167.2	76	94.4	25.3	14	158	103	163	105	161	103	6.78	1.82	0.94	5.01273	4.3
33033716	1	3	3	1	1	1	3	99.9	7					1	1	4	1	0	6	7	0										0	0	164.6	63.6	83.6	22.7	9	121	74	125	74	123	70	4.28	1.49	1.44	2.16273	4.66
33033717	1	3	1	1	0	1	4	1.8		7	7		6	1	1	4	1	0	8			1	0	0	30			1	0	2	1	0	173.2	68.5	79.8	20.1	8	139	86	137	89	138	87
33033718	1	4	1	1	1		5	1.6	2	2				1	1	2	2	0	4	4	0	4	0								0	1	161.5	55.5	77.7	18	6	104	67	107	63	105	66	4.75	1.23	1.01	3.18091	5.41
33033719	1	2	1	1	1	1	3	99.9						1	1	0	1	0	7												1	0	166	67.9	83.4	22.7	10	125	79	130	80	128	74
33033720	1	2	1	1	0		7	99.9						1	1	2	1	0	6												0	0	168.1	62.7	78.5	24.1	12	95	65	99	67	100	64	4.44	1.04	1.38	2.58727	4.17
33033721	1	2	1	1	0		5	99.9						1	1	2	1	0	7												0	1	172	80.5	93.2	30.4	14	135	86	130	87	134	84	5.84	1.83	1	4.00818	6.59
33033722	1	3	1	1	0		3	99.9						1	1	1	1	0	7												0	0	170.6	74.8	285.1	27.5	12	119	79	120	74	117	80	5.55	2.61	1.18	3.18364	5.36
33033723	1	4	1	1	0		5	99.9						1	1	3	1	0	5												0	0	172.1	70.5	83.4	24.8	12	120	77	123	76	119	80	6.54	0.68	1.26	4.97091	4.94
33033724	1	2	1	1	1		6	99.9						1	1	4	1	0	7											2	0	0	165.8	67.4	80.7	23.7	11	136	68	132	69	138	71	7	0.78	1.19	5.45545	8.39
33033725	1	1	1	4	2		5	99.9			6			1	0	8	1	0	6					0	20						0	0	169.1	59.1	74.3	20.5	9	121	66	119	70	119	68	5.89	2.51	0.99	3.75909	4.87
33033726	1	3	1	1	0		4	99.9						1	1	0	1	0	5												0	0	169.8	79.5	92.1	31.4	16	126	75	130	72	125	71	4.42	0.86	1.88	2.14909	4.2
33033727	1	2	1	1	0		4	99.9						1	1	1	1	0	7												0	0	174	70.8	81.7	24.3	10	125	86	120	83	125	82	4.28	1.06	1.06	2.73818	3.07
33033728	1	2	1	1	0		4	99.9						1	0	9	1	1	0												0	0	176.7	72.1	85.4	26.7	11	99	58	97	60	98	62	6.76	3.54	1.07	4.08091	17.94
33033729	1	2	1	1	0		4	99.9						1	1	2	2	1	2												0	0	173.1	68.1	82.6	25.7	10	130	70	131	74	127	71	4.6	1.88	1.23	2.51545	4.61
33033920	1	3	1	1	0		4	99.9						1	0	6	1	0	2												0	0	152	42.1	65	25.9	4	127	71	121	70	122	70
33033948	1	1	1	4	1	1	2	1		4	1			1	0	8	1	0	3			6	0	0	10						0	0	169.6	64.1	84.8	21.3	8	139	87	132	83	131	86
33033949	1	2	1	1	0		4	2.3		7	7			1	0	7	1	0	4			10	0	4	0						0	0	164.4	63.5	83.2	19	10	122	75	110	72	116	71	3.82	0.57	1.25	2.31091	5.29
33033950	1	1	1	1	1	1	2	1					2	1	0	8	1	0	8									1	0		0	0	164	60.8	75.6	23.4	9	112	73	114	74	111	73	7.06	0.56	1.58	5.22545	5.81
33033951	1	2	1	1	0		2	1		7				1	1	2	1	0	4			5	0							2	0	0	158.3	65.4	88.8	31.2	15	140	82	132	82	134	76	4.05	0.42	1.26	2.59909	6.48
33033952	1	2	1	1	0	1	2	0.9						1	1	5	1	1	0											2	0	0	166.8	58.1	83.2	14.6	6	85	156	156	82	154	80	4.42	0.4	1.59	2.64818	5.07
33033953	1	1	1	4	0		2	1		7				1	1	0	1	0	5			0	20							2	0	0	163.8	57.9	78.2	17.9	8	126	73	127	72	129	69	4.06	0.63	1.55	2.22364	4.79
33033954	1	2	1	1	0		2	99.9		3	7			1	0	8	1	0	7			0	30	1	0						0	0	152.6	46.8	70.7	999.9	999.9	102	47	102	45	101	45	2.91	0.4	1.47	1.25818	5.49
33033955	1	2	1	1	0		4	2.5		7				1	0	6	1	0	3			6	0							0	1	1	168.8	77.4	97.2	26.1	15	155	95	155	96	149	93	6.33	0.41	1.55	4.59364	6.26
33033956	1	1	1	4	0		3	0.9						1	0	6	1	0	3												0	0	153.8	47.2	75.6	17.1	6	145	67	138	64	140	66
33033957	1	1	1	4	1	1	2	1			4			1	0	6	1	0	8					0	30					2	0	0	169.2	67	88.8	24.6	11	136	76	137	70	137	74
33033958	1	2	1	1	0		2	1					5	1	0	8	1	1	5									0	20	2	0	0	165.2	57.9	81.6	20	7	125	71	128	76	121	78	3.56	0.59	0.92	2.37182	6.18
33033961	1	3	1	1	0		4	1.1			3			1	0	8	1	0	6					0	30						0	0	163	58	72.5	23.7	6	128	78	127	73	127	77
33033963	1	3	1	4	1		2	0.8			2			1	1	1	1	0	3					0	30						0	0	165	58.4	81	27.7	8	128	80	130	79	127	80
33033964	1	2	1	4	0		3	1.3	6		7		7	1	0	6	1	0	4	16	0			0	15			0	30	2	1	0	155	62.6	82	23.1	13	141	91	147	95	141	95
33033965	1	2	1	1	0	1	5	2.4						1	0	6	1	0	5											2	0	0	161	57.5	85	27.4	8	131	83	134	80	136	76	4.01	1.08	0.99	2.52909	7.12
33033966	1	2	1	1	2		2	1	1	5	3			1	0	7	1	0	4	2	0	2	30	0	25						0	0	162.6	53.4	75.2	21.4	6	94	60	94	56	99	58	4.08	0.38	1.36	2.54727	4.56
33033967	1	1	1	4	1		2	1.2		5				1	1	3	1	0	5			0	30							0	0	0	157	54.9	72	15.6	8	141	83	134	80	133	74	5.72	0.68	1.5	3.91091	4.95
33033968	1	2	4	4	0		5	1.3	6		7		7	1	0	6	1	0	4	10	0			0	15			0	30		0	0	159	62.6	82	23.2	14	139	89	137	85	135	88	4.33	0.71	1.42	2.58727	5.55
33033969	1	2	1	4	0		5	1.3					1	1	0	7	1	0	5									0	30		0	0	157.6	59.9	87.6	23.1	12	163	79	160	76	156	78
33033972	1	2	1	4	2		5	2.5	3					1	0	7	1	0	4	6	0										9	9	168.3	83.9	102.2	27.2	19	130	72	123	71	128	68	5.4	0.78	1.45	3.59545	4.91
33033973	1	4	1	4	1	1	8	4			7		7	1	0	5	1	0	3					0	20			0	30		0	1	175.8	81.5	96.2	28.3	14	123	82	128	85	124	84	5.89	1.12	0.96	4.42091	5.51
33033975	1	1	1	4	1	1	4	1.7	7					1	0	5	1	1	0	8	30										0	0	165.3	55.7	71.6	16.9	5	112	74	112	79	112	75	5.08	0.61	2.14	2.66273	5.01
33033976	1	3	1	1	0	1	3	1.2	7					1	0	4	2	1	0	1	0										0	0	171.8	77	81.2	25.3	12	128	86	125	84	125	86	6.22	1.24	1.37	4.28636	4.93
33033977	1	2	1	1	1		2	1		7			7	1	1	5	1	0	3			8	0					0	30	0	0	1	169.5	75	88.8	25.2	13	142	81	145	76	139	77	3.89	1.2	0.83	2.51455	4.9
33033978	1	3	1	1	0		4	1.8		7			7	1	1	2	1	0	2			5	0					1	30	2	0	1	171	77.9	95.6	28.2	14	119	78	112	72	112	79	6.34	1.12	1.26	4.57091	5.08
33033979	1	3	1	1	0		1	0.5		6				1	0	8	1	0	3			0	30								1	0	165.8	60.1	71.6	11.8	6	108	61	106	62	101	57
33033980	1	2	1	4	0	1	7	3		7				1	1	2	1	0	2			2	0								0	1	166.7	62.2	74.8	20.5	8	107	72	100	74	103	72	4.77	1.08	1.36	2.91909	5.17
33033981	1	3	1	1	1	1	3	1						1	0	8	1	0	6												1	0	159	57.3	81	19.8	8	122	78	113	76	118	72	5.48	1.88	1.09	3.53545	4.97
33033982	1	1	1	1	1	1	2	99.9			7			1	1	5	2	0	5					0	15						0	0	164.5	66.9	77.8	23.8	12	135	74	132	71	129	78	5.98	1.03	1.39	4.12182	4.35
33033983	1	2	1	1	1		3	1.2	7					1	8	0	1	0	3	9	30										0	0	169.6	55.2	67.2	12.4	3	119	68	110	67	118	67	4.43	0.61	1.47	2.68273	5.62
33033984	1	3	1	2	0		2	1.1					7	1	1	0	1	1	5									1	0	2	9	9	171.6	65.9	84.6	27.9	10	141	90	133	89	138	87	5.01	0.84	0.76	3.86818	4.3
33033985	1	2	4	4	1		1	0.6		7	1		5	1	0	8	1	1	0			0	30	1	0			0	20		0	0	162.2	49.2	68.6	29.2	5	115	60	117	67	118	64	3.4	0.26	1.64	1.64182	4.55
33033986	1	2	1	1	1	1	3	1.5		3				1	0	7	1	0	4			0	30								1	0	164.8	55.9	75.1	56.2	6.2	113	66	104	65	107	69	4.13	1.14	1.93	1.68182	4.56
33033987	1	2	1	1	1	1	3	1.8		7				1	1	5	1	0	5			9	0								0	0	175.1	74.2	93.2	21	10	147	94	139	88	138	90	16.62	17.81	0.64	6.11	7.73
33033988	1	4	1	1	0		3	1						1	1	1	3	1	0												0	0	169.6	64.1	84.8	21.3	8	139	87	132	83	131	86	3.4	1.85	0.77	1.78909	3.92
33033989	1	2	1	1	2	0	2	0.8		2				1	0	8	1	0	5			0	30								9	1	173.8	85.7	97.6	28.2	15	119	70	122	64	120	68	5.3	1.05	1.98	2.84273	5.02
33033990	1	1	1	1	0		3	99.9	4	7				1	2	0	1	0	5	8	0	0	50								9	1	175.4	73.2	85.4	20.5	9	111	68	109	63	114	60	4.26	0.46	1.16	2.89091	5.19
33033991	1	2	1	4	1	0	4	1.7	7					1	0	8	1	0	5	10	0										0	0	163.5	61.1	83.2	28.1	5	128	75	123	75	125	77	5.62	1.21	1.07	4	4.7
33033992	1	2	4	1	1	1	2	1			7	2	1	1	0	4	1	0	5					2	0	1	0	0	30		0	0	168.2	64.7	77.2	19.4	8	101	66	104	62	104	63	4.03	0.55	1.22	2.56	4.49
33033993	1	2	1	4	1		3	99.9			4			1	1	2	1	0	7					0	30						0	0	175	55.4	69.8	14.2	2	102	63	103	63	101	63
33033994	1	1	1	1	0	1	2	1.5	4		7			1	0	8	1	0	3	9	0			0	40						0	0	160.5	60.9	84	13.2	11	111	61	114	63	117	65	5.02	0.78	0.81	3.85545	4.88
33033995	1	1	1	4	0		2	0.8		3	3			1	1	2	1	0	5			0	30	0	35					2	0	0	168	69.3	85	26.7	12	123	73	120	69	121	69	4.04	1.66	0.84	2.44545	5.36
33033996	1	2	1	1	1	0	2	1		7				1	0	8	1	0	4			8	0								0	0	171	72.6	86	22.6	11	125	81	117	78	119	76	4.42	1.01	0.89	3.07091	3.42
33033997	1	1	1	1	1	1	2	1		4	5			1	3	0	1	0	2			0	40	0	30						0	0	163	68.6	93	25.1	14	135	89	134	86	128	82	5.07	1.9	0.87	3.33636	4.56
33033998	1	3	1	1	0		2	99.9						1	0	8	2	0	6												0	0	163.4	46.1	67	15.3	3	122	72	117	73	121	69	5.06	0.74	0.6	4.12364	3.8
33033999	1	1	1	1	0		3	1.5		7	3			1	1	2	1	0	6			0	20	0	20					0	0	0	151	42.7	75	38.8	4	150	82	148	78	151	75	4.03	0.52	1.11	2.68364	5.29
33034001	2	5	1	1	0	1	3	99.9		7	7			1	0	5	1	0	2			0	30	0	45						1	1	166.8	64.7	80.3	30.2	4	125	69	123	67	116	72
33034002	2	3	1	1	0		3	99.9		3				1	0	7	1	0	2			0	10								0	1	157.6	42.1	58.9	18.5	1	98	53	95	52	96	54	4.78	2.72	0.92	2.62364	5.25
33034003	2	3	1	4	0		3	0.5						1	0	6	1	0	2												0	0	160.8	73.3	86.5	33.1	9	131	90	125	81	121	87	3.9	1.26	0.96	2.36727	6.92
33034004	2	4	1	4	0		5	0.4		7	7			1	0	6	1	0	3			1	0	0	30						0	0	156.2	57.3	75.3	30	5	134	67	129	73	137	70	5.06	2.06	1.04	3.08364	4.23
33034005	2	1	1	4	0		4	0.8						1	0	6	1	0	2												0	1	146.6	41.7	67.4	29.8	3	102	76	108	73	104	74	4.8	1.74	0.9	3.10909	5.62
33034006	2	3	1	1	0		3	0.7		7				1	0	2	1	1	0			0	30								0	0	155.8	60	79.3	29.6	6	118	75	114	76	116	83	3.63	0.57	1.1	2.27091	4.51
33034007	2	3	1	4	0		4	8		3	3			1	0	6	1	0	3			1	30	0	20						0	1	157.6	61.8	74.1	31.8	6	108	64	99	66	98	66	4.31	0.57	1.4	2.65091	5.15
33034008	2	2	1	1	0		4	1		7	2			1	0	6	3	0	5			1	0	0	30						0	1	156.6	69.2	88.7	34.8	10	141	93	144	87	141	93	4.51	1.04	0.98	3.05727	6.1
33034009	2	2	1	1	0		2	1		2				1	0	6	1	0	3			1	30								0	0	156	51.8	67.2	26.5	3	100	69	93	65	93	63	5.37	0.28	1.54	3.70273	4.77
33034010	2	4	1	4	0		4	0.8				1		1	0	6	1	0	6							0	15				0	1	155.2	54.7	79.1	29.9	5	124	78	119	80	128	81
33034011	2	1	1	4	0		5	3	2	7	7			1	0	4	1	0	5	0	15	1	30	0	15						0	1	153.8	54	72.1	27.7	5	103	67	109	68	101	63	4.47	0.7	1.33	2.82182	5.13
33034012	2	3	1	1	0		4	1		7	7			1	0	4	1	0	5			2	0	0	20						0	1	160.6	61.7	75.4	34.1	6	109	64	100	65	107	68	4.71	0.5	1.44	3.04273	4.19
33034013	2	2	1	1	0		3	0.5		2	4			1	0	7	1	0	4			1	30	0	30						0	0	157.4	70.9	88.8	27.1	15	108	73	108	74	101	70	3.54	0.65	0.9	2.34455	4.86
33034014	2	2	1	1	0		4	1.5		7	7		7	1	0	4	1	1	0			6	0	0	20			1	30		0	1	156.4	63	77.6	31.2	7	111	54	105	56	108	57
33034015	2	1	1	1	0		1	99.9		7	5			1	0	2	1	1	0			0	30	0	20					1	9	9	153.4	60.4	86.4	31.7	7	133	90	132	90	134	83	6.04	0.58	1.4	4.37636	5.36
33034016	2	5	1	1	0		3	0.5			7			1	0	4	1	0	5					0	30						1	1	155.8	55.1	72.5	28.7	5	111	61	120	59	117	63
33034017	2	2	1	4	0		3	0.4		2	4			1	0	6	1	0	3			1	0	0	30						1	0	150.6	49.5	74.5	30.1	5	100	54	103	58	101	56	5.94	1.01	1.05	4.43091	5.38
33034018	2	1	1	1	0		5	0.6		2	5			1	0	7	1	0	3			1	0	0	30						0	0	163.4	62.2	75.6	30	5	117	69	114	71	113	68	6.12	0.62	1.38	4.45818	3.92
33034019	2	2	1	1	0		4	0.8	2	7				1	0	7	1	0	3	0	10	1	0								1	1	150.2	50.1	71.6	27	5	103	57	102	62	100	65	4.44	0.78	1.24	2.84545	4.77
33034020	2	3	1	4	0		4	0.7		7	7		3	1	0	4	1	0	5			1	15	0	20			0	15		1	1	150.2	51.8	72.1	29.2	5	97	56	95	53	97	52	4.67	0.45	1.34	3.12545	5.11
33034021	2	3	1	1	0		3	0.5	2	7	4			1	0	6	1	0	4	0	30	1	0	0	30						0	0	152.2	55.5	77	28.4	6	120	73	115	75	119	72	6.1	1.08	1.31	4.29909	4.96
33034022	2	2	1	1	0		4	0.6				3		1	0	2	1	0	2							0	30				0	1	152.8	59	80.6	32.8	7	113	64	103	72	110	65	3.69	0.89	1.07	2.21545	4.46
33034023	2	2	1	1	0		4	0.2		7	7	7	7	1	0	6	1	0	3			0	30	0	30	0	30	0	30		0	0	152.4	50.5	64.8	25.3	4	102	59	99	59	106	56	4.44	0.5	1.73	2.48273	4.38
33034024	2	5	1	1	0		3	0.5		1	5			1	0	4	1	0	4			2	0	0	30						1	0	156.2	57.3	76	30.5	6	123	81	116	73	115	76	4.35	1.25	1.08	2.70182	4.73
33034025	2	3	1	1	0		3	99.9	6	2	7			1	0	5	1	0	2	2	0	2	0	0	30						0	0	162	55.9	78.4	26.8	4	107	65	109	61	100	66	3.79	0.62	1.14	2.36818	5.27
33034026	2	5	1	1	0		5	99.9						1	0	2	1	0	2												0	0	156	49.7	67.4	28.1	3	104	56	100	56	108	60	4.02	0.59	1.21	2.54182	4.68
33034027	2	1	1	1	0		4	0.3		1	7			1	0	8	1	0	3			0	30	0	20						0	1	148.8	41.2	67.3	20.6	2	96	57	99	61	100	62	4.78	0.49	1.77	2.78727	4.42
33034028	2	3	1	4	0		4	0.6						1	0	2	1	0	2												0	0	163.4	66.4	83	29.9	6	113	68	120	71	119	62	5.99	0.52	1.34	4.41364	5.16
33034029	2	3	1	4	0		3	0.5		5	3		2	1	0	6	1	0	3			0	30	0	15			1	0		0	0	151.4	46.2	67	27.6	3	108	75	111	68	112	69	4.63	0.78	1	3.27545	4.66
33034030	2	2	1	4	0		4	0.5		7	7		3	1	0	2	1	0	2			1	0	0	30			0	30		0	0	152.6	75.9	91	37.9	15	121	70	116	68	115	72	4.46	0.96	1.12	2.90364	4.83
33034031	2	2	1	1	0	1	3	1		7	7			1	0	2	1	0	1			4	0	0	30						1	1	154.8	60.6	90.6	34.2	7	109	66	110	66	109	72	6.08	1.35	1.24	4.22636	5.49
33034032	2	2	1	1	0		3	99.9		7				1	0	3	1	1	0			0	30								0	1	162	58.9	73.7	28.2	4	100	54	103	58	99	54	4.36	0.22	1.48	2.78455	4.72
33034033	2	3	1	1	0	0	1	99.9		7				1	0	3	1	0	5			2	0								1	1	155.8	54.4	69.9	26.2	4	129	82	127	80	123	78	3.54	0.77	1.02	2.17	4.96
33034034	2	2	1	4	0		5	2		7	5			1	0	5	1	0	5			2	0	0	15						0	1	163.8	64.2	76	27.5	5	99	72	105	58	104	64	5.05	0.53	1.53	3.27909	4.73
33034035	2	3	1	1	0		3	0.5		3	2	1	2	1	0	6	1	0	3			1	30	0	30	1	30	1	0		0	1	151.8	48.5	70.5	27	3	102	60	104	59	100	63	4.7	1.4	1.19	2.87364	4.82
33034036	2	3	1	1	0		3	0.5		7	3			1	0	4	1	0	4			1	0	0	30						0	0	166	59.1	70	27.3	3	108	68	111	71	112	72	3.59	0.61	1.42	1.89273	4.35
33034037	2	3	1	4	0		4	2.5		7				1	0	7	1	0	5			2	0								1	0	167.2	65.1	79.8	30.4	5	129	84	123	78	127	82	6.63	1.26	1.24	4.81727	5.08
33034038	2	3	1	1	0		3	0.5		7	2			1	0	5	1	0	4			1	30	0	30						0	0	162.4	56.1	66.5	23.8	3	91	57	90	58	88	57	4.33	0.2	1.72	2.52818	4.57
33034039	2	2	1	4	0		3	99.9						1	0	3	1	1	0												0	0	158	53.5	77.5	27.8	4	108	57	110	58	101	54	3.63	0.46	1.33	2.09091	4.55
33034040	2	4	1	1	0		2	0.2		7	2			1	0	4	1	0	4			0	30	0	20						0	1	150.6	52.8	71.5	30.1	5	98	59	92	55	99	53	4.63	0.76	1.4	2.88455	5.31
33034041	2	2	1	4	0		3	0.6						1	0	2	1	0	2												1	1	161.4	68.4	84	32.6	7	117	74	116	70	116	69	5.49	0.35	1.66	3.67091	5.35
33034042	2	3	1	1	0		3	99.9		7	2			1	0	5	1	0	5			0	30	0	15						0	0	166.4	57.9	71.9	25.6	3	118	76	109	77	115	79	4.31	0.39	1.42	2.71273	4.73
33034043	2	4	1	4	0	0	3	0.5		7	7			1	0	4	1	0	4			1	0	0	20						0	0	164.6	64.5	77	30.4	5	106	69	105	70	108	70	4.11	0.79	1.25	2.50091	4.34
33034044	2	3	1	4	0		4	0.4		2	3		2	1	0	6	1	0	4			1	30	0	30			0	30		0	0	155	53.9	66.4	25.4	4	118	62	114	59	109	60	3.68	0.53	0.98	2.45909	4.43
33034045	2	3	1	1	0		3	0.5		3	1		5	1	0	6	1	0	3			1	0	0	30			0	30		0	0	157.8	62.1	68.5	26.9	6	104	60	99	58	100	62	3.78	0.28	1.33	2.32273	4.71
33034046	2	3	1	1	0		6	99.9		2				1	0	2	1	0	5			0	30								0	0	159.2	50.1	67.5	26.6	3	112	62	108	60	103	61	3.52	0.44	1.15	2.17	4.84
33034047	2	3	1	1	0		4	0.2		7				1	0	5	1	0	3			1	30								0	0	158.6	44.5	69	24.5	2	104	67	106	68	104	65	5.25	0.42	1.93	3.12909	4.33
33034048	2	3	1	4	0		1	1		4	7	7		1	0	7	1	0	4			0	10	0	30	1	0				0	0	157.8	67.1	83.5	34.4	9	115	72	114	68	113	73	5.02	0.56	1.94	2.82545	5.15
33034049	2	2	1	1	0	1	5	99.9		7	7		2	1	0	5	2	0	5			0	30	1	0			1	0		0	0	164.4	61.5	82.9	31.4	5	103	61	108	57	104	61	2.75	0.36	0.96	1.62636	4.75
33034050	2	2	1	1	0		4	0.5						1	0	3	1	1	0												0	0	158	63.9	80	31.1	7	120	74	111	72	116	71	4.23	0.34	1.06	3.01545	4.01
33034051	2	2	1	4	0		4	0.5		7	7			1	0	2	1	1	0			1	0	0	30						0	1	152	48.3	70.4	22.8	3	108	70	110	63	107	64	4.74	0.41	1.51	3.04364	4.68
33034052	2	3	1	4	0		4	0.5		7				1	0	2	1	1	0			2	0								0	0	150.4	55.6	76.7	32.4	6	119	73	111	71	116	71	5.92	0.5	1.81	3.88273	4.51
33034053	2	2	0	1	0		4	99.9		7		1	2	1	0	7	1	0	2			0	10			0	30	0	30		0	1	167.8	85.7	100.7	36.7	11	101	66	100	67	98	62	4.54	0.68	1.41	2.82091	4.74
33034054	2	3	1	1	0		4	0.5		7	7			1	0	4	1	0	4			0	30	0	30						1	0	162.8	54	75.4	25.5	3	97	68	93	65	96	65	4.07	0.61	1.47	2.32273	4.42
33034055	2	3	1	4	0		5	99.9		3			1	1	0	3	1	0	7			0	40					0	20		0	0	154.2	71.8	88.5	35	12	113	71	105	68	105	66	5.53	1.53	1.21	3.62455	4.49
33034056	2	3	1	4	0		4	0.6						1	0	6	1	0	2												0	0	156	49.6	63.5	26.3	3	91	52	85	50	86	55	4.92	0.63	1.16	3.47364	4.65
33034057	2	2	1	4	0		4	0.4		3	3			1	0	8	1	0	4			1	30	0	30						0	0	160.2	70.8	88.5	32.7	8	123	75	123	72	119	71	3.77	1.67	0.66	2.35091	4.68
33034058	2	3	1	1	0		4	0.3		7	7			1	0	6	1	0	3			0	30	0	15						0	1	164	63.7	77.2	31	5	128	81	132	85	137	85	4.26	0.36	1.19	2.90636	5.53
33034059	2	3	1	4	0		4	0.8		7	3	4		1	0	4	1	0	5			0	20	0	15	0	30				0	0	167.8	73.1	81.3	33.3	9	97	57	103	57	98	57	3.55	0.29	1.01	2.40818	5.22
33034060	2	4	1	4	0		3	0.2		7	7	1	1	1	0	4	1	0	2			1	30	3	0	0	30	0	30		0	0	158.2	47.9	63.4	24.1	2	97	59	95	58	90	58	3.69	0.28	1.46	2.10273	4.6
33034061	2	2	1	1	0		3	0.5		7	1			1	0	4	1	0	2			1	0	0	30						1	0	156.6	55.2	77	30.3	5	118	59	112	68	118	59	3.95	0.93	1.11	2.41727	6.24
33034062	2	4	1	1	0		4	0.2		7	7		7	1	0	3	1	0	3			1	0	0	30			0	30		1	0	162	57.9	67	22.5	2	103	67	99	61	99	63	3.58	0.41	1.1	2.29364	4.78
33034063	2	3	1	1	0		4	99.9	2	1				1	0	8	1	0	3	0	10	0	20								0	1	157.2	67.9	89.8	31.5	9	143	93	139	97	137	94	6.27	3.32	1.07	3.69091	8.64
33034064	2	2	1	1	0		3	2	7	1				1	0	5	1	0	3	0	4	2	0								0	1	154.6	61.6	79.5	31.4	7	130	75	133	77	128	73	4.2	0.31	1.14	2.91909	4.12
33034065	2	2	1	1	0		3	1		7	7			1	0	4	1	0	5			0	45	1	0						1	1	168	62.2	73.6	31.4	4	106	66	107	65	106	64
33034066	2	3	1	4	0		5	2		7	7			1	0	4	1	0	3			1	0	0	30						0	1	160	61.9	81.2	29.8	5	99	65	96	61	95	64	3.78	1.46	1.02	2.09636	3.9
33034067	2	2	1	1	0		4	99.9						1	0	3	1	0	3											1	0	0	156.4	75.1	91	36.3	13	133	88	130	90	128	86	5.16	0.81	1.27	3.52182	4.86
33034068	2	4	1	1	0		10	2		7	7			1	0	6	1	0	4			1	0	0	30						0	0	153	53.6	78.4	30.6	5	119	73	113	70	113	68	5.23	0.41	1.17	3.87364	4.68
33034069	2	3	1	1	0	0	3	99.9						1	0	3	1	0	7												0	0	150.8	74.6	91.2	35.5	12	110	79	111	70	107	66	5.68	1.05	1.08	4.12273	4.4
33034070	2	3	1	1	0		3	0.4		3	3			1	0	6	1	0	3			1	0	0	30						0	1	164	60.3	74.3	28.1	5	116	77	117	80	116	72	3.79	0.6	1.15	2.36727	4.15
33034071	2	2	1	4	0	1	2	0.5		7	7			1	0	3	1	0	2			1	0	0	20						0	0	152.6	55.8	77.2	31	6	97	67	100	65	97	66	4.38	1.97	1.49	1.99455	4.78
33034072	2	1	1	1	0		4	2			7			1	0	5	1	0	3					0	10						0	0	154.4	60.6	79	32.6	8	125	74	124	79	123	76	2.97	0.66	0.81	1.86	6.19
33034073	2	1	1	4	0		5	0.3						1	0	2	1	0	3												0	0	156.4	55.3	74.3	31	6	130	78	130	79	127	74	6.73	1.12	1.76	4.46091	5.36
33034074	2	1	1	4	0		4	3		7	7			1	0	8	1	0	2			0	30	0	20					0	0	0	155.8	66	86.8	35.8	9	107	71	110	65	107	64	6.13	0.45	1.7	4.22545	4.88
33034075	2	2	1	1	0		3	0.5						1	0	6	1	0	2												0	0	157.2	56.9	74	30.5	6	119	71	107	68	111	65	4.25	0.59	1	2.98182	4.5
33034076	2	3	1	1	1		2	0.2		1			2	1	0	6	1	0	2			0	30					0	30		0	0	150	43	73.7	28.4	3	117	65	110	63	118	63	4.7	0.84	1.18	3.13818	11.23
33034077	2	1	1	4	0		4	99.9						1	0	6	1	0	2												0	1	155	74.3	89.2	37.4	14	128	88	128	85	135	85	6.55	0.38	1.77	4.60727	4.76
33034078	2	1	1	1	0		3	0.3		2	5			1	0	6	1	0	4			0	30	0	15						1	1	152.2	43.3	65.5	27.5	2	95	69	97	60	95	63	5.25	0.43	1.41	3.64455	4.54
33034079	2	1	1	1	0		2	99.9		1	7			1	0	6	1	0	5			0	10	0	30						0	0	156	56.8	77.7	31.5	6	144	91	145	88	135	89	5.56	1.45	1.28	3.62091	5.4
33034080	2	1	1	4	0	0	5	2.5		7	7			1	0	4	1	0	3			3	0	0	40						0	0	157	65.5	85.5	35.4	9	107	72	107	71	105	73	3.22	0.87	1	1.82455	6.48
33034081	2	2	1	1	0	0	6	1						1	0	6	1	0	5												0	0	158.8	64.8	89.8	32.4	7	107	66	100	65	104	65	2.81	0.08	1.01	1.74545	5.69
33034082	2	3	1	4	0		3	0.6						1	0	6	1	0	2												0	1	156.6	57.9	71	29.1	5	107	70	109	67	109	73	5.86	0.45	1.5	4.15545	4.69
33034083	2	1	1	4	0		4	2		7	7			1	0	5	1	0	4			2	0	1	0						0	0	168.4	66.5	77.5	28.2	5	105	71	106	64	102	64	4.11	0.41	1.61	2.31364	5.18
33034084	2	2	1	4	0		2	0.5		7	7			1	0	6	1	0	2			0	30	0	15						0	0	158.2	54.2	74	29.5	4	105	48	105	53	103	57	3.35	0.51	1.23	1.88818	4.1
33034085	2	1	1	4	0		1	0.4		3				1	0	8	1	0	2			0	30							0	0	0	151.4	54	83	31.2	7	154	87	158	85	150	88	6.48	1.8	0.94	4.72182	4.83
33034086	2	3	1	1	0		3	1		3	7			1	0	5	1	0	3			1	0	0	10						0	0	151.6	47.7	72.2	26.6	3	116	71	114	73	113	67	4.17	0.36	1.06	2.94636	4.6
33034087	2	1	0	1	0		6	0.2		7	7			1	0	4	1	0	3			5	0	0	10						0	1	156	51.5	71	29.5	4	107	74	102	69	102	69	4.65	0.52	1.52	2.89364	5.01
33034088	2	3	1	4	0		4	1		1				1	0	5	1	0	2			1	0								0	0	164.8	61.5	81.3	31.9	5	107	66	99	66	99	67	6.1	0.56	1.35	4.49545	6.05
33034089	2	1	1	4	0		5	1		7	7			1	0	6	1	0	3			2	0	0	20						0	0	160.4	64.8	82.6	33.3	7	117	74	117	74	120	71	5.81	1	1.02	4.33545	4.75
33034090	2	2	1	1	0		4	2		7				1	0	4	1	0	2			0	15							2	1	1	163	62	80	30.9	5	139	99	136	99	131	92	4.56	1.3	0.97	2.99909	4.53
33034091	2	3	1	4	0		3	0.5		1			7	1	0	6	1	0	3			0	59					0	30		0	0	163	50.1	64	26.5	2	114	79	110	73	113	79	5.26	0.41	1.71	3.36364	4.36
33034092	2	1	1	4	0		4	0.4						1	0	9	1	0	2												0	0	160.4	59	84.6	32.9	5	90	65	96	65	100	69	3.83	0.44	1.22	2.41	4.06
33034093	2	3	1	4	0		5	0.5		2	3			1	0	6	1	0	3			1	0	0	20						0	1	152.8	62.5	84	34.1	9	117	72	123	73	116	73	4.88	0.44	1.21	3.47	5.48
33034094	2	3	1	1	0		3	99.9		7			7	1	0	4	1	0	3			1	0					0	30		0	1	159.6	80.4	99.2	35.7	13	150	108	158	100	153	103	6.32	2.09	1.31	4.06	3.91
33034095	2	1	1	4	0		2	0.3			7			1	0	2	1	0	3					1	0					2	0	1	156.4	75.7	94.9	40.8	16	142	78	140	73	145	70	5.64	0.91	1.18	4.04636	5.82
33034096	2	2	1	1	0		5	1.5		3				1	0	5	1	0	3			2	30							1	0	0	156.4	65.4	89	35.1	10	148	79	141	79	143	80	4.86	0.75	0.99	3.52909	5.46
33034097	2	1	4	4	0		8	99.9		7	7			1	0	3	2	0	9			0	20	0	30						0	0	152.4	53.6	72.8	32.3	7	172	86	166	88	165	86	6.9	1.03	0.92	5.51182	4.46
33034098	2	1	4	4	0		1	0.2						1	0	4	1	0	3												0	0	152.2	47.5	72.1	31.1	5	138	78	130	74	130	82	4.48	0.44	1.54	2.74	4.42
33034099	2	1	1	4	0		1	0.4			3			1	0	6	1	0	2					2	0						0	0	160.6	63.9	90	33.3	7	118	76	114	77	110	78	5.85	0.69	1.27	4.26636	5.5
33034100	2	1	1	1	0		4	0.5		7	7			1	0	6	1	0	4			1	0	0	30						0	0	145	41.8	61.3	27.5	4	139	69	131	75	134	78
33034101	2	1	1	4	0		5	2		7	5			1	0	6	1	0	2			0	30	1	0						0	0	149.6	50.9	73.3	33.5	6	116	74	111	74	118	71
33034102	2	3	1	4	0		4	99.9		1			2	1	0	6	1	0	3			6	0					1	0		0	0	149	56.9	75.4	30.2	8	149	83	144	78	143	86	4.8	0.32	1.59	3.06455	4.58
33034103	2	1	1	4	0		9	0.5						1	0	8	1	0	4												0	0	164	48.9	64.4	28.1	2	112	79	114	76	114	80
33034104	2	1	1	4	0		2	0.3		7	7		2	1	0	6	1	0	3			0	30	0	20			0	30		0	0	158.2	57.2	78	30.7	5	114	80	114	81	114	72	6.72	0.68	1.5	4.91091	6.43
33034105	2	1	1	4	0		3	0.4		3				1	0	7	1	0	3			1	0							0	1	1	159.8	84.6	92.8	38.8	15	164	93	157	99	155	91	4.47	0.88	1.06	3.01	4.18
33034106	2	1	1	1	0		5	1		7	7			1	0	6	1	0	3			5	0	0	15						0	1	163	60.2	73	29.1	5	105	63	99	64	106	65	5.61	0.28	1.65	3.83273	4.47
33034107	2	1	1	4	0	1	6	1		7				1	1	0	1	0	5			0	30								0	0	165	62.2	80	32.9	6	139	89	133	86	132	85	5.87	0.65	1.88	3.69455	5.51
33034108	2	2	4	4	0		7	2		7			7	1	0	3	1	0	3			0	30					0	30		0	0	163.4	52.1	68.3	30.6	3	119	73	125	78	119	78	6.4	0.64	1.84	4.26909	5.07
33034109	2	1	1	4	0		5	2		7	1		2	1	0	8	1	0	4			1	0	0	30			0	30		0	0	158.2	62.2	82.1	31.7	7	131	82	125	77	122	77	4.54	1.7	1.03	2.73727	4.72
33034110	2	1	1	4	0		4	0.5		7	7			1	0	6	1	0	3			2	0	0	15					2	0	0	154.4	52.2	77.2	31.1	5	131	71	128	80	126	81	6.34	0.92	1.97	3.95182	4.15
33034111	2	1	1	1	0		4	0.5		3			3	1	0	7	1	0	4			0	30					0	30		0	0	156	49.3	66.4	27.5	3	130	67	123	76	125	75	4.42	0.34	1.52	2.74545	4.83
33034112	2	1	2	4	0		1	99.9		7				1	1	0	1	0	8			1	30								0	0	167	64.2	79.8	29.8	5	146	82	141	87	148	89	5.44	2.29	0.93	3.46909	5.79
33034113	2	1	1	4	0		6	1		7	7			1	0	6	1	0	3			0	30	0	30						0	0	153.2	58.1	71	36.1	8	125	78	122	78	117	78	5.6	0.76	1.47	3.78455	4.86
33034114	2	2	1	1	0		2	0.6						1	0	6	1	0	2												1	0	156	59.4	77	33.5	7	106	73	106	72	111	73	5.64	0.47	1.73	3.69636	4.69
33034115	2	1	1	4	0		4	99.9		7			5	1	0	7	1	0	5			0	30					0	30		1	0	158.4	46.2	67	27.4	2	109	75	105	70	115	76	6.1	0.43	1.83	4.07455	4.77
33034116	2	1	1	1	0		4	99.9		2				1	1	0	2	0	8			2	30								0	0	166.2	53.9	64.1	26.7	2	112	66	104	65	111	64	4.88	0.96	1.36	3.08364	4.75
33034117	2	1	4	4	0		1	0.5			7		7	1	0	6	1	0	3					0	30			0	30	2	0	0	152.8	68.3	98.7	41.1	15	135	74	142	73	139	75	6.59	1.79	1.01	4.76636	5.13
33034118	2	3	1	1	0		3	0.6		7			1	1	0	6	1	0	2			1	30					0	15		1	1	152.4	68	85.7	36	12	104	70	106	65	104	65	4.3	0.78	0.99	2.95545	4.81
33034119	2	3	1	4	0	1	4	2		7	1			1	0	4	1	0	5			0	30	0	30						0	1	155	48.2	65.6	29	3	93	60	96	60	99	59	5.76	1.23	1.14	4.06091	4.57
33034120	2	1	1	1	0		5	1		7	7			1	0	4	2	3	0			0	30	0	15						0	0	154	62.5	79.5	36.2	9	121	75	126	80	130	75	4.91	0.91	1.01	3.48636	4.14
33034121	2	3	1	4	0		5	0.4		1				1	0	6	1	0	2			1	0								1	1	153.6	54.2	78.5	31.6	6	107	73	101	66	101	68	6.98	1.22	1.01	5.41545	4.92
33034122	2	1	1	4	0		2	99.9						1	0	5	3	0	6											2	9	1	146.8	53.4	74.8	37.8	10	117	71	121	63	123	70	2.72	0.39	0.99	1.55273	4.84
33034123	2	1	1	1	0		2	1	5	5				1	0	6	1	0	2	0	30	0	20								0	0	152.2	63.8	91.5	36.3	11	110	67	113	67	110	66	5.38	1.21	1	3.83	4.73
33034124	2	1	1	4	0		4	0.6			2			1	0	6	1	0	2					0	30						0	0	168	66.3	80.4	31.2	5	119	76	115	75	121	76	5.04	0.99	1.17	3.42	4.74
33034125	2	1	1	4	0		6	0.5		2				1	0	7	1	0	4			0	30								0	1	158	54	74	30.3	5	111	71	114	58	108	61
33034126	2	1	1	4	0		3	0.5		2				1	0	6	1	0	4			1	0								0	0	167	84.2	98	36.6	12	125	84	127	80	123	82	5.27	4.79	0.85	1.72	8.66
33034127	2	3	1	4	0		3	1		7	7		7	1	0	4	1	0	3			0	30	0	30			1	0		0	1	162.2	54.9	73	28.1	4	122	67	114	65	120	68	5.18	0.8	1.11	3.70636	5.28
33034128	2	1	1	1	0		2	0.6						1	0	6	1	0	2												0	0	157.2	69.8	90.5	37.7	12	116	78	117	73	111	74	6.04	0.92	1.2	4.42182	4.78
33034129	2	2	1	1	0		3	2	6	2	1		5	1	0	8	1	0	4	1	0	1	0	0	20			1	0	2	0	0	160.2	73.8	86.3	37	12	145	91	139	87	140	88	6.81	1.52	1.28	4.83909	5.11
33034130	2	1	1	4	0		5	2		7	3			1	0	6	1	0	5			2	0	1	0					1	1	1	162	54.8	78.8	25.5	3	134	83	141	86	136	90	4.79	0.65	1.1	3.39455	4.89
33034132	2	1	1	4	0		5	1		3			7	1	0	5	1	0	4			2	0					0	30	2	0	0	157	62.6	81.7	36	9	131	70	134	73	133	70	5.29	0.75	1.16	3.78909	4.65
33034133	2	1	4	4	0		1	0.5		7				1	0	4	1	0	3			0	30							1	0	0	147	56.5	85.5	36.6	11	153	72	154	75	151	69	5.39	0.99	1.18	3.76	4.97
33034134	2	1	1	4	0		7	0.8						1	0	6	1	0	2												0	1	161.2	64.6	80.3	32	7	121	82	126	84	128	74
33034135	2	1	1	4	0		2	0.4						1	0	7	1	0	5											2	0	0	153	68.1	92.5	42.7	15	152	79	160	77	154	79	5.07	1.27	1.47	3.02273	5.41
33034136	2	1	1	4	0		2	99.9		7	7			1	0	2	1	0	8			2	0	0	20						0	0	143.8	53.6	86.7	37.9	10	126	61	130	68	128	65	4.62	1.22	1.09	2.97545	4.74
33034137	2	1	1	4	0		9	0.6						1	0	6	1	0	2												0	0	153.4	58.8	80.3	33.2	8	120	69	124	68	128	69	4.9	0.65	1.12	3.48455	4.77
33034138	2	1	1	4	0		2	0.5		3				1	0	6	1	0	4			1	0							2	0	0	151	65.7	87.5	24	14	152	91	150	88	151	89	4.96	2.04	0.8	3.23273	4.85
33034139	2	1	1	4	0		5	0.6						1	0	6	1	0	2											0	0	1	150.4	68.2	94.7	40.3	15	153	76	159	81	158	80	5.18	0.94	1.03	3.72273	8.74
33034140	2	1	1	4	0		4	0.6		5	2			1	0	6	1	0	4			0	30	0	20					0	0	0	143.8	47.9	79.4	32.8	7	152	85	153	85	147	81	6.38	2.02	1.05	4.41182	4.44
33034141	2	1	1	4	0		2	0.6						1	0	6	1	0	2												0	0	157.6	68.3	85.4	38.7	12	131	82	124	74	123	76	4.35	1.64	0.78	2.82455	4.88
33034142	2	1	1	4	0	1	2	99.9		7	7			1	0	4	1	0	8			1	0	0	20					2	1	0	157.4	71.7	94.7	34.4	12	167	86	166	85	164	83	7.77	2.2	1.32	5.45	6.65
33034143	2	1	1	4	0		5	1.5		6	7			1	0	8	1	0	2			0	30	0	20						0	0	153	73.9	94.5	39.6	16	134	63	143	75	144	76	6.01	1.15	1.17	4.31727	4.64
33034144	2	1	4	4	0		1	0.3						1	0	6	1	0	4												0	0	144.6	55.1	88.7	39	11	142	79	150	78	147	73	5.37	1.04	1.29	3.60727	4.64
33034145	2	1	1	4	0		4	99.9						1	0	6	1	0	2												0	0	159	68.4	96.6	38.9	11	130	75	137	68	135	70	4.32	0.85	1.03	2.90364	4.89
33034146	2	1	1	4	0		7	1.5		7	7			1	0	4	1	0	3			1	0	0	30						0	0	157.6	54.1	74.3	29.5	5	129	76	130	76	121	76	3.41	1.03	0.79	2.15182	5.52
33034147	2	2	3	1	0		7	1.5	7		7			1	0	6	1	0	3	5	0			0	45						0	0	154.6	48.2	68.2	29.7	3	109	60	112	63	110	68	4.85	0.76	1.18	3.32455	4.44
33034148	2	3	1	4	0		6	1		7			5	1	0	6	1	0	2			0	30					0	30		0	1	153.4	49.8	71.8	29.8	5	108	64	110	69	112	65	5.58	0.73	1.66	3.58818	4.14
33034149	2	1	4	4	0		1	0.3			3			1	0	6	1	0	4					0	20					2	0	0	151.6	46.8	74	36.4	5	170	80	176	80	172	77	5.03	1.5	0.74	3.60818	8.83
33034150	2	1	1	4	0		5	0.5		3	3			1	0	6	1	0	4			0	30	0	20					2	0	0	150.4	52.6	83.7	35.4	7	151	80	147	78	145	76	6.11	1.24	1.28	4.26636	4.81
33034151	2	1	1	4	0		3	2		7				1	0	6	1	0	4			1	0								0	1	152	53.5	76.3	34.5	6	118	71	123	69	118	69	4.69	1.01	1.09	3.14091	4.74
33034152	2	1	1	4	0		2	0.4			4			1	0	6	1	0	2					0	30						0	0	151	60.1	83	37.5	11	117	69	117	69	116	73	7.87	1.37	1.26	5.98727	4.41
33034153	2	1	4	4	0		1	99.9		7	7			1	0	7	1	0	2			0	30	0	30					2	9	9	153	72.2	108	43.5	17	145	86	145	86	142	80	6.58	1.2	1.36	4.67455	5.44
33034154	2	1	1	4	0		6	0.7		3	5			1	0	6	1	0	4			1	0	0	30						0	0	157.2	63.7	84.3	34	8	119	80	120	78	124	80
33034155	2	1	1	4	0	1	7	2						1	0	6	1	0	5												0	0	154.2	60.3	94	39.3	9	135	77	135	73	126	72
33034156	2	1	1	4	0		5	0.6			7			1	0	6	1	0	2					0	40					0	0	0	150.4	63.3	89	37.9	11	161	80	161	77	161	79	5.6	0.71	1.17	4.10727	5.84
33034157	2	1	4	4	0		3	1		7				1	1	5	1	0	4			0	30								0	0	138.6	46.5	73.1	33.7	8	141	68	140	62	142	65	6.75	0.85	1.29	5.07364	4.49
33034158	2	1	4	4	0		4	99.9		3	7		7	1	1	0	1	1	0			2	0	0	30			1	0		0	0	156.6	53.4	75	30.8	5	110	66	114	70	112	65	5.31	1.42	0.92	3.74455	7.76
33034159	2	3	1	4	0		3	0.4						1	0	6	1	0	5											2	0	0	149.6	58.2	81	42.5	11	143	64	145	69	141	66	5.92	0.74	1.16	4.42364	4.81
33034160	2	1	1	4	0		6	99.9		7				1	0	6	1	0	8			1	0								0	0	156	59.3	79.7	34.4	7	137	77	140	83	133	76	4.99	1.75	1.07	3.12455	5.19
33034161	2	1	1	4	0		5	0.6			7			1	0	6	1	0	2					0	30						0	0	154	51.5	73.5	31.8	5	100	66	103	68	106	67	4.4	0.59	1.18	2.95182	5.04
33034162	2	2	1	1	0		2	0.6						1	0	6	1	0	2											2	0	0	156.4	67.1	82.5	33.4	9	129	83	124	77	120	83	4.78	0.64	1.04	3.44909	4.26
33034163	2	2	1	4	0		6	1		7	5		7	1	0	6	1	0	2			0	30	0	30			0	30		1	0	159.6	60	84.1	34.4	7	116	65	108	58	117	60	6.01	1.09	1.29	4.22455	4.66
33034164	2	2	1	4	0		2	99.9		7	7			1	0	4	1	0	4			1	0	0	20					2	0	0	153.6	77.2	105.5	42.3	18	121	62	121	58	120	64	7.59	2.11	1.2	5.43091	7.31
33034165	2	1	1	4	0		5	99.9		7				1	0	4	1	0	6			1	0								0	0	154.8	54.3	81.8	32.3	6	106	66	112	70	106	64	4.6	0.52	1.14	3.22364	4.57
33034166	2	2	3	4	0		1	99.9			2			1	0	8	2	0	5					0	15						0	0	154.6	57.1	80	33.6	6	119	80	119	80	117	76	4.61	0.85	0.99	3.23364	4.49
33034167	2	1	4	4	0		1	99.9		5	7		4	1	0	6	1	0	2			0	10	1	0			0	30		0	0	146	52.1	79.3	35.5	9	133	58	138	61	135	60
33034169	2	1	1	4	0		6	0.6						1	0	6	1	0	2											1	0	1	156	58.2	80.2	31.2	6	149	94	158	89	149	90	5.95	0.65	1.64	4.01455	4.81
33034170	2	1	1	4	0		2	0.6						1	0	6	1	0	2												0	0	150	53.8	80	38.3	8	136	67	126	67	130	67	5.18	1.1	1.22	3.46	5.41
33034171	2	1	1	4	0		2	99.9		5				1	0	4	1	0	4			0	30							2	0	0	147.4	61.8	87.9	39	13	169	88	162	89	160	93	6.53	1	1.28	4.79545	4.74
33034172	2	1	1	4	0		2	0.5		3	3			1	0	6	1	0	4			0	30	0	30					0	0	0	153.6	52.4	77.3	33.5	6	144	69	148	66	142	65	5.75	1.26	1.09	4.08727	4.68
33034173	2	1	1	1	0		2	0.5						1	0	6	1	0	2												0	0	150.4	50	68.6	30.1	5	105	61	101	62	95	62	5.21	0.31	2.21	2.85909	4.59
33034174	2	1	1	4	0		2	0.3		5	6			1	0	6	1	0	2			0	30	0	20					2	9	9	151.8	57.4	86	32.4	7	147	83	150	77	144	80	6.68	1.01	1.55	4.67091	4.78
33034175	2	1	4	4	0		1	99.9		7				1	0	8	2	0	6			0	30								0	0	158.6	62.4	84.9	36.3	8	96	64	96	62	99	60	5.33	1.44	0.89	3.78545	4.92
33034176	2	1	4	4	0		4	99.9		7				1	0	6	1	0	6			0	20								0	0	156	49.1	67	22.9	2	139	78	138	69	134	68	4.35	0.39	1.38	2.79273	4.82
33034177	2	1	1	4	0		1	99.9		7				1	0	8	1	0	8			0	30								0	0	158.8	66.9	94.2	36.4	10	154	87	145	86	144	85	5.34	0.79	1.22	3.76091	8.39
33034178	2	1	1	4	0		2	0.8		2				1	0	6	1	0	2			0	30							2	0	0	146	56.1	84.1	40.6	11	145	84	145	82	152	86	5.74	0.73	1.39	4.01818	7.66
33034179	2	1	1	4	0		2	0.7		5	7			1	0	5	1	0	2			0	30	0	20						0	0	150	39.9	66	38.6	3	120	65	130	62	129	63
33034180	2	1	1	4	0		5	0.6						1	0	6	1	0	2											2	0	0	149	56.3	81.9	37.7	10	128	57	129	61	133	61	4.53	1.77	0.76	2.96545	6.4
33034181	2	1	1	1	0		3	1		7				1	0	6	1	0	4			0	30							2	0	0	146.6	52.4	78	32.1	8	154	86	144	81	148	81	4.82	1.99	1	2.91545	5.47
33034182	2	2	4	4	0		4	99.9						1	0	5	1	0	3												0	1	152.8	51.8	75.9	37.1	6	138	79	136	76	138	81	7.52	3.37	1	4.98818	11.18
33034183	2	1	4	4	0		1	0.9						1	0	6	1	0	4											2	0	0	142.8	43.7	72	999.9	999.9	122	56	125	59	124	54	5.43	0.89	1.01	4.01545	5.88
33034184	2	1	1	4	0		1	0.5		4	5			1	0	6	1	0	2			0	20	0	30					1	0	0	155	59.5	82.3	36.5	9	124	65	118	69	118	65	4.09	0.68	1.42	2.36091	6.92
33034185	2	2	1	1	0		3	0.5		1				1	0	6	1	0	5			1	0								0	1	156.6	54.4	76.5	31.7	5	107	70	111	71	103	73	4.24	1.16	1.12	2.59273	4.68
33034186	2	1	1	4	0		3	99.9		7	7			1	0	6	1	0	2			0	30	1	0						0	0	157	55.2	76.3	31.4	5	125	64	116	63	116	65	4.6	0.61	1.34	2.98273	5.22
33034187	2	1	1	1	0		6	99.9						1	1	2	1	0	2												0	0	149.8	59.1	87.5	35.7	10	141	67	137	71	136	70	6.97	0.52	1.47	5.26364	5.46
33034188	2	1	1	1	0		5	0.5		7	7			1	0	8	1	0	2			0	30	1	0						9	9	155	66.9	88.2	35.9	11	119	70	122	73	128	76	6.23	1.41	1.23	4.35909	5.86
33034189	2	1	1	1	0		2	0.3		6				1	0	6	1	0	2			8	0								1	0	160.6	51.5	70	24.9	3	99	59	97	57	94	58
33034190	2	5	1	1	0		8	4					2	1	0	6	1	0	4									0	30		1	0	153	52.7	67.2	25.7	4	121	72	121	71	118	70
33034191	2	1	1	4	0		5	2		5	5			1	1	0	1	0	2			0	30	0	20						0	0	161.4	64.2	87.6	33.8	8	111	67	105	69	110	68	4.26	0.72	1.51	2.42273	5.06
33034192	2	1	1	4	0		1	0.3						1	0	6	1	0	5												0	0	151.8	48.2	70.9	31.3	4	111	72	113	66	115	69	6.68	0.87	1.28	5.00455	4.77
33034193	2	1	4	4	0		1	99.9		3				1	0	6	1	0	8			0	20								0	0	146.6	41.1	60.8	26.6	3	147	85	138	82	137	81	5.63	1.05	1.45	3.70273	5.25
33034194	2	1	1	4	0		3	0.6			2			1	0	6	1	0	3					1	0						0	0	157.4	67.1	92.8	37	10	160	91	155	96	159	95	6.39	1.81	1.05	4.51727	5.3
33034195	2	3	1	4	0		2	99.9		7	7			1	0	6	1	1	0			4	0	0	30						0	0	148.4	47.5	70.2	32.2	5	107	68	112	74	108	73	6.02	0.83	1.58	4.06273	5.37
33034196	2	1	1	4	0		5	0.6						1	0	6	1	0	4												0	0	161.2	69.3	96.5	35.3	9	111	75	106	67	106	70	4.33	0.45	1.06	3.06545	5.15
33034197	2	2	1	4	0		5	1		4				1	0	6	1	0	4			3	0								0	1	156.2	51.3	73	29.9	4	92	52	87	51	87	52	4.89	0.49	1.17	3.49727	4.37
33034198	2	1	4	4	0		1	0.3		4				1	0	7	1	0	4			0	20								0	0	147.2	59.1	92	38.3	11	139	79	131	73	137	71
33034199	2	1	1	4	0		3	1		1	2		7	1	0	8	1	0	2			2	0	0	30			0	30	1	0	1	162.2	57.9	75	30.7	5	129	86	131	88	125	85	5.89	0.53	1.24	4.40909	4.73
33034201	2	1	1	4	0		6	2		7	5			1	0	8	1	0	2			0	30	0	30					0	1	0	161.4	60.1	88	33.9	6	130	77	127	73	125	72	4.84	0.76	1.41	3.08455	5.11
33034202	2	1	1	4	0		4	1		7	7		7	1	0	8	1	0	2			2	0	0	30			0	30		0	1	165.4	61.4	78	29.8	5	113	78	119	73	114	73	5.59	1.11	1.6	3.48545	4.88
33034203	2	3	1	4	0		5	1		7	2			1	0	8	1	0	2			0	30	0	20					1	0	0	157.6	57.5	79.2	31.1	6	140	80	133	76	140	74	4.03	1.16	0.74	2.76273	6.51
33034204	2	1	1	4	0		5	0.6		4	3			1	0	8	1	0	5			0	30	0	20						9	9	156.2	72.6	90.8	37.3	13	134	76	135	70	127	73	4.74	0.99	1.3	2.99	5.02
33034205	2	1	1	4	0		4	99.9		7	7			1	0	5	1	0	3			4	0	0	30						0	0	158.8	70.6	87	32.4	10	132	78	138	77	133	81	4.13	2.6	0.83	2.11818	11.44
33034206	2	3	1	4	0		7	1.5		5	2			1	0	8	1	0	2			0	30	0	30						0	0	153.2	49.2	65.3	26.9	4	101	63	93	54	95	60	6.05	0.71	1.73	3.99727	4.44
33034207	2	3	1	1	0		4	99.9		7				1	0	6	1	0	8			0	30								0	0	155	49.6	73.8	28.6	3	111	68	110	75	106	67	4.36	1.04	0.87	3.01727	5.03
33034208	2	1	1	4	0		2	0.5			7			1	0	4	1	0	3					0	15						0	0	154.2	55.5	77	36.6	8	189	81	179	78	180	77	4.95	0.42	1.66	3.09909	4.88
33034209	2	2	1	1	0		1	0.5			7			1	0	6	1	0	3					0	15						0	0	153.8	64.1	79.5	34	10	120	79	127	75	126	80	5.55	0.58	1.45	3.83636	5.75
33034210	2	1	1	4	0		2	99.9		1	3			1	0	8	1	0	2			0	20	0	30						0	0	154.2	46.4	65	28	3	101	67	106	66	100	69	4.92	1.42	1.26	3.01455	5.33
33034211	2	5	1	1	0		5	99.9			2			1	0	6	1	0	2					0	10						0	1	156.2	46.7	62.8	21.6	2	106	58	103	64	103	59	3.97	0.41	1.45	2.33364	5.31
33034212	2	1	1	4	0		2	0.5						1	0	6	1	0	3												0	0	143	49.4	69.7	36	9	138	59	135	60	144	61	5.41	0.8	1.46	3.58636	4.16
33034213	2	1	1	4	0		2	0.5		5	3			1	0	6	1	0	5			1	0	1	0						0	0	145.2	39.6	61.8	31.6	4	160	59	154	59	158	58	5.3	0.38	1.79	3.33727	5.21
33034214	2	1	1	1	0		5	1		7				1	0	6	1	0	4			0	40								0	0	153.2	47.5	69.1	31.4	4	123	80	128	75	120	70	5.9	1.21	1.16	4.19	5.56
33034215	2	1	1	4	0		5	99.9		7	7			1	1	0	1	0	2			0	30	0	20						0	0	158	61.3	84	36.6	7	145	87	145	82	142	84	6.69	3.03	1.1	4.21273	5.25
33034216	2	1	0	4	0		2	0.4		3	4			1	0	7	1	0	5			0	30	0	15					2	0	1	156.6	60.5	83.5	40.8	10	123	71	113	72	113	67	5.54	2.1	1	3.58545	5.32
33034217	2	1	1	4	0	1	4	1		3	7			1	0	6	1	0	2			0	30	0	20						0	0	165.4	80.5	86.7	37.2	11	137	83	128	78	128	75	7.07	1.25	1.25	5.25182	5.21
33034218	2	1	4	4	0		1	99.9		3	1			1	0	7	2	0	3			0	20	1	0					2	0	0	143.8	54.7	87.4	43	13	159	78	165	81	168	81	6.99	1.15	1.65	4.81727	5.32
33034219	2	2	4	4	0		1	0.8						1	0	8	1	0	2												0	0	149.8	67.1	92.9	41.3	16	158	90	168	91	168	93	4.58	1.77	1.31	2.46545	6.76
33034220	2	1	1	4	0		4	99.9		2	7			1	0	9	1	0	2			0	30	0	20						0	1	154.8	65.7	88.8	34.9	11	147	89	143	93	138	92
33034221	2	1	1	1	0		3	0.5			1			1	0	6	1	0	3					0	15						0	0	156	56.1	72.8	30.1	6	123	67	120	69	113	65	5.33	0.94	1.25	3.65273	5.5
33034222	2	1	1	4	0		2	1		3				1	0	6	1	0	4			0	10								9	9	154	59	86.4	999.9	999.9	158	82	161	86	162	82	4.53	1.56	1.16	2.66091	4.67
33034223	2	1	4	1	0		1	0		7				1	1	2	1	0	6			0	30								1	0	156.6	57.9	72.2	29.3	6	132	83	134	81	132	77	5.76	1.67	1.02	3.98091	4.99
33034224	2	1	4	4	0		4	0.4						1	0	6	1	0	3											2	0	0	152	51.4	76	999.9	999.9	141	73	140	71	145	73	6.29	0.93	1.31	4.55727	4.76
33034225	2	1	3	4	0		3	1.5						1	0	8	1	0	2											1	0	0	147.6	42.9	70.2	999.9	999.9	207	75	215	76	217	80	6.87	1.6	1.09	5.05273	7.43
33034226	2	1	1	4	0		2	0.4		3				1	0	6	1	0	5			0	30							2	0	0	148.8	63	85.2	999.9	999.9	154	56	148	61	153	61	5.45	0.58	1.38	3.80636	6.13
33034227	2	1	1	4	0		3	1			7			1	0	4	1	0	3					0	30						0	0	145	41.3	64.4	30.5	4	134	62	128	65	127	64	6.94	0.65	1.84	4.80455	5.21
33034228	2	1	4	4	0		1	0.3		7	7			1	0	3	1	0	3			1	0	0	30						0	0	143.6	55.4	86.8	999.9	999.9	175	89	171	88	165	87	5.16	1.81	1.56	2.77727	5.13
33034229	2	1	1	1	0		5	2		6				1	1	0	1	0	3			8	0								0	0	158.2	72.4	80.2	35.9	11	117	72	114	72	119	76	6.04	0.84	1.57	4.08818	5.29
33034230	2	1	1	4	0		3	0.5		3				1	0	6	1	0	5			1	0							2	0	0	149.4	54.2	81.3	38.1	9	179	83	170	82	175	80
33034231	2	1	4	4	0		1	1		4				1	0	6	1	0	4			1	0							2	0	0	145.4	47.2	70.5	30.7	6	178	86	173	79	170	82
33034233	2	1	1	4	0		3	0.5		7				1	0	6	1	0	3			6	0							2	0	0	155.4	56.9	85.5	37	7	143	70	153	70	143	71	4.9	1.51	0.92	3.29364	6.17
33034234	2	1	1	4	0		5	0.7						1	0	6	1	0	5											2	0	0	156	50	999.9	999.9	999.9	150	88	159	86	156	86	4.99	1.18	1.26	3.19364	9.64
33034235	2	1	1	4	0		2	0.4						1	0	6	1	0	3											2	0	0	149	64	93.8	39.6	14	138	70	142	72	136	70	7.69	2.59	1.39	5.12273	4.94
33034236	2	1	1	4	0		2	1		3	3			1	1	0	1	0	3			3	0	0	30					2	0	0	157.4	61.1	88.3	37.5	9	168	72	162	70	160	67	5.11	0.91	1.4	3.29636	4.71
33034237	2	1	1	4	0		2	0.5			5			1	0	7	1	0	5					0	20						0	0	148.4	56.3	85.9	33.4	9	139	86	143	88	148	89	9.09	4.25	1.3	5.85818	10.15
33034238	2	1	4	4	0		1	0.2						1	0	6	1	0	3											2	0	0	136.2	40.9	73	999.9	999.9	167	68	162	60	160	61	6.9	0.96	2.18	4.28364	5.46
33034239	2	4	4	2	0		1	99.9						1	1	0	1	0	4											2	0	0	152	49.1	88.5	32.1	5	131	76	126	74	128	76
33034240	2	1	1	4	0		2	0.4			7			1	0	6	1	0	3					0	30					2	0	0	145	43.8	67.5	35.5	6	167	86	175	86	175	83	6.7	1.38	1.6	4.47273	5.04
33034241	2	1	4	4	0		1	0.3		7	7			1	0	4	1	0	3			0	30	0	13					2	0	0	150	49.8	82	999.9	999.9	169	72	166	71	162	74	4.56	1.15	1.37	2.66727	6.02
33034242	2	1	4	4	0		1	0.5		3	3			1	0	5	1	0	3			0	30	0	20						0	0	138.2	52.5	77.7	42.6	20	162	74	168	72	169	69	5.1	2.03	1.31	2.86727	6.06
33034243	2	1	4	4	0		5	99.9		7				1	0	8	1	0	2			2	0							2	0	0	151.8	69.5	96	39.9	16	150	85	157	83	158	75	5.66	1.63	1.19	3.72909	7.26
33034244	2	1	1	4	0		1	99.9						1	0	6	1	0	2											2	0	0	156.1	48.8	73.8	999.9	999.9	149	92	150	90	158	85	6.1	2.99	0.69	4.05091	5.64
33034245	2	1	4	4	0		1	0.5						1	0	6	2	0	4											1	0	0	141.4	54	90	999.9	999.9	148	69	156	65	151	67
33034246	2	3	1	4	0		3	0.3			7			1	0	6	1	0	3					0	30					2	0	0	161.6	63.2	89.8	37.1	8	124	72	120	71	120	66	6.99	1.12	1.2	5.28091	5.97
33034247	2	1	4	4	0		3	99.9						1	0	5	1	0	3											2	0	0	137	41.7	79.9	999.9	999.9	123	62	127	53	121	60	4.21	1.02	0.98	2.76636	5.59
33034248	2	2	1	1	0		3	99.9						1	1	2	2	0	4											2	0	0	157	61.1	93.5	41	9	157	71	159	72	162	72	7.76	2.74	1.46	5.05455	7.66
33034249	2	3	1	3	0		5	99.9						1	1	2	3	0	1												0	0	150	48.8	84	38.2	6	144	61	140	69	139	74	7.64	2.65	1.15	5.28545	6.79
33034501	2	1	1	4	0		8	99.9		7				1	2	0	2	0	5			0	30								1	0	153.8	73	102.2	38.1	15	131	81	128	83	131	80	5.28	1.85	1.22	3.21909	5.11
33034502	2	1	4	4	0		1	99.9		1				1	0	4	1	0	1			0	30								9	9	149.2	42.7	68.4	31	3	119	66	114	65	112	62	5.84	0.8	1.23	4.24636	4.66
33034503	2	1	1	4	0		5	2		7	7	7		1	1	2	1	0	4			2	0	2	0	0	20				0	0	155.2	76.5	91.2	37.3	14	124	71	122	72	125	77	7.2	1.78	1.4	4.99091	7.67
33034504	2	1	1	1	0		2	1		7				1	1	2	1	0	4			8	0							2	0	0	152.2	61.3	83.2	37.2	10	168	87	160	90	160	91	5.98	1.46	1.11	4.20636	6.58
33034505	2	1	1	4	0		2	0.3		7	1			1	0	6	1	1	0			2	0	0	20					2	0	0	150.3	49.8	68.5	129.1	5	158	85	156	82	160	81	4.62	0.48	1.23	3.17182	4.7
33034506	2	1	1	1	0		6	3		3				1	1	0	1	0	6			0	40								0	1	161.8	60.5	78.6	28.4	5	117	79	117	79	121	73	5.1	1.29	1.06	3.45364	5.36
33034507	2	1	1	4	0	1	3	0.1	7	7	7			1	0	5	1	1	0	0	30	0	10	0	15						0	0	158.9	60.4	77.6	34.1	7	117	76	115	79	120	82	5.24	1.62	1.03	3.47364	4.82
33034508	2	1	1	4	0		3	1.2		7	2			1	0	5	1	0	3			0	30	0	20					2	1	1	158.4	61.1	82.6	33.1	7	120	83	122	81	125	80	4.59	1.15	1.11	2.95727	6.62
33034509	2	1	4	4	0		3	1.2		7				1	0	5	1	0	4			0	0							0	9	9	138.8	38.1	70.5	34.8	4	156	71	164	69	155	64	5.5	0.54	1.51	3.74455	5.26
33034510	2	1	1	1	0		2	0.7	1	7	1			1	0	4	1	0	3	0	15	0	20	0	25					0	0	0	151	57.5	88.1	32.7	8	181	103	179	101	177	98	5.68	0.58	1.08	4.33636	4.93
33034511	2	1	1	4	0		2	1		7				1	0	4	1	0	3			0	15							0	9	9	155.4	43.4	65	27.4	2	160	76	166	74	164	79	4.97	0.65	1.48	3.19455	5.79
33034512	2	1	1	4	0		2	1.1		7				1	0	9	1	0	5			1	0								1	0	145.8	47.7	73	38.4	7	144	88	130	83	136	79	3.8	1.37	1.25	1.92727	4.96
33034513	2	1	1	4	0		5	2.5		7	7			1	1	2	1	0	8			9	0	1	0						0	0	153.2	55.4	81.8	35.2	8	111	71	115	68	110	65	6.47	0.93	1.07	4.97727	5.05
33034514	2	1	1	4	0		2	5		7	1			1	0	6	2	0	4			0	20	0	40						0	0	127.2	31.7	64	45.4	5	128	69	127	76	120	68	5.38	1.08	1.39	3.49909	4.57
33034515	2	1	1	4	0	0	2	99.9		2				1	0	8	1	0	2			0	20								9	9	133.2	38.6	65	30.7	6	171	84	168	78	162	83	5.4	0.69	1.44	3.64636	4.68
33034516	2	2	1	1	0	1	2	0.8		7				1	0	5	1	1	0			1	0								0	0	157.6	66.8	90	34.1	9	135	77	130	70	124	78	6.8	2	1.01	4.88091	5.18
33034517	2	2	4	4	0		1	0.5		7	7			1	1	0	1	0	5			1	30	0	30					2	0	0	150.6	49.5	85.2	42	7	132	69	130	69	130	64	5.09	1	1.12	3.51545	5.6
33034518	2	1	4	4	0		1	0.6		7	1			1	1	0	1	0	3			0	20	0	30						9	9	147.8	40.5	66.4	36.8	3	157	83	155	88	152	82	5.4	0.56	1.93	3.21545	4.85
33034519	2	2	1	4	0		3	1.2		7				1	0	9	1	0	4			2	0							2	0	1	162.2	61.2	83.5	30.7	6	136	86	138	84	140	83	4.74	0.51	1.14	3.36818	5.51
33034520	2	1	1	4	0		5	1.6		7	5			1	0	6	1	0	9			3	0	0	40					2	0	1	155	52.8	78.8	32.3	5	150	83	148	84	144	80	4.08	1.04	1.05	2.55727	5.88
33034521	2	2	4	4	0		2	1		7	7			1	0	6	1	0	3			2	0	0	30						0	0	149.6	48.1	72.1	32.4	5	113	72	115	67	118	69	6.43	1	1.37	4.60545	4.1
33034522	2	2	4	4	0		3	1		7				1	0	5	2	0	1			0	15								0	0	143.8	43.7	67.4	35.3	6	112	53	120	56	115	57	7.05	1.12	1.78	4.76091	4.87
33034523	2	1	1	1	0		3	1.3	7	7	7			1	1	2	1	0	3	8	0	0	15	1	0					2	0	1	152	58.7	82.7	30.5	7	158	80	152	78	150	77	6.36	2.18	1.19	4.17909	7.11
33034524	2	2	1	1	0		3	1.5		3				1	0	6	1	0	8			6	0								1	1	149	64.9	83.7	34.7	11	169	100	165	96	162	95	4.25	0.84	1.03	2.83818	4.52
33034525	2	1	4	4	0		1	0.5		6	2			1	0	8	1	0	5			0	30	0	30						0	9	152.6	57.2	88.1	40.5	9	120	69	118	61	113	65
33034526	2	1	0	4	0		3	1.5						1	1	0	1	0	6												0	0	158	49	76	25.7	2	153	96	157	90	148	92	4.62	0.62	0.87	3.46818	4.74
33034527	2	1	4	4	0		4	1.6		7				1	0	5	1	0	3			0	30							2	0	0	139.2	35.8	65	30.5	3	153	82	150	77	148	73	4.12	0.76	1	2.77455	4.92
33034528	2	1	4	4	0		1	0.4		7	1			1	0	7	1	0	6			7	0	1	0						9	9	149	47.2	70.4	28.2	5	152	82	146	81	145	81	5.98	0.4	1.65	4.14818	4.9
33034529	2	1	1	4	0		6	3.5		7	3			1	0	5	1	0	3			0	40	0	15						0	0	157.4	65.1	87.8	31.9	10	140	72	142	76	140	72	4.96	1.07	1.1	3.37364	4.81
33034530	2	2	1	1	0		3	1		7				1	1	0	1	2	0			0	45								1	0	159	65.4	93.2	29.7	7	133	76	131	74	132	77	5.12	1.62	1.02	3.36364	4.61
33034531	2	1	1	4	0		2	0.8		7	3			1	1	2	1	1	0			1	0	0	30						0	0	143.4	53.9	70.4	40.9	11	123	60	125	66	128	65	4.18	1.8	1.29	2.07182	4.54
33034532	2	1	4	4	0	1	1	0.5		7				1	0	9	1	0	3			0	30								0	0	142.5	41.4	65	35.8	5	150	58	149	58	148	58	5.25	0.39	1.62	3.45273	4.84
33034533	2	1	1	4	0		6	3		7	2			1	1	0	1	0	3			5	0	0	30						0	0	150	58.7	86	33	9	147	85	151	83	151	78	4.56	1.38	1.06	2.87273	4.96
33034534	2	1	4	4	0		1	0.8		6	2			1	1	0	1	0	3			0	20	0	30					0	0	0	155	50.6	75	34	5	155	84	162	85	160	87	6.03	0.81	1.26	4.40182	6.01
33034535	2	1	1	4	0		2	1.2		7	1			1	0	4	1	0	3			0	20	0	15					0	0	0	138.9	56.2	89.5	41.9	16	194	91	190	88	188	88	8.06	2.81	1.15	5.63273	5.59
33034536	2	3	1	4	0		2	1		7				1	1	2	1	0	5			0	30								1	0	165	67.2	88	32.5	7	114	67	106	68	109	67	6.85	1.19	1.32	4.98909	4.83
33034537	2	1	1	4	0		4	1.6		7	3		2	1	0	8	1	1	5			1	30	1	0			0	45		1	0	154.6	79.5	97.8	40.4	16	131	81	128	81	130	76	6.77	1.72	1.17	4.81818	13.92
33034538	2	1	1	4	0		2	1		2				1	0	8	1	1	5			3	0							0	0	0	144	55	85.2	40.1	12	136	72	134	77	138	71	5.47	2.15	0.91	3.58273	4.09
33034539	2	3	1	1	0		3	2		7				1	0	7	1	0	5			0	30								1	1	150.7	46.9	69	21.8	3	100	64	101	63	100	63	4.84	0.5	1.48	3.13273	4.46
33034540	2	1	1	4	0	0	5	2.2	2	7				1	0	6	1	0	3	4	0	0	25								0	0	155	63.4	90	31.6	9	145	90	140	91	140	89	5.05	1.22	1.26	3.23545	5.64
33034541	2	2	4	1	0		3	1.5	7	7	7			1	1	0	1	1	0	7	30	1	0	1	0					2	9	1	151.2	58.6	85.5	35.6	8	120	76	116	79	116	77	4.94	0.73	1.2	3.40818	4.75
33034542	2	1	1	1	0		3	1.5		7				1	0	9	1	0	3			9	0								0	0	154	53	76.4	28.7	5	99	62	94	61	99	63	6.73	0.4	1.73	4.81818	4.7
33034543	2	1	1	1	0		5	2		7	7			1	1	5	1	0	5			8	0	1	0						0	0	157.4	43.7	61	19.2	1	96	64	75	60	98	65	5.28	0.56	1.36	3.66545	5.1
33034544	2	2	1	4	0		3	1.2		7				1	0	9	1	0	3			8	0								0	0	159	64.5	84	32.3	7	115	72	113	73	112	69	5.32	0.54	1.38	3.69455	4.48
33034545	2	1	4	1	0	1	1	0.4	6	7				1	0	5	1	0	3	3	0	0	40								0	1	162	69.8	87	22.3	11.6	109	60	108	60	109	60	6.4	1.64	1.21	4.44455	7.17
33034546	2	1	4	4	0		1	0.4		6	1			1	0	6	1	0	3			0	20	0	20						0	0	149	38.6	69	36.2	3	133	56	128	56	131	57	5.62	0.88	1.32	3.9	4.99
33034547	2	1	1	1	0		3	1.5		7	2			1	0	6	1	1	0			2	0	0	30					2	9	1	158.2	72.3	95.8	35.9	11	120	72	121	73	120	70	5.38	2.48	1.03	3.22273	6.42
33034548	2	1	4	1	0		1	0.3		7				1	0	4	2	0	3			0	20							0	9	0						180	96	182	97	180	97	4.23	0.75	1.07	2.81909	4.49
33034549	2	1	1	4	0		2	99.9		6	7			1	1	0	1	0	3			2	20	1	0						0	1	151	58.5	81	30	8	118	76	121	75	117	76	3.88	0.81	1.31	2.20182	5.1
33034550	2	1	1	1	0		4	3						1	1	0	1	1	0												0	0	158	49	70	19	2	128	85	128	79	127	84	3.91	0.76	0.88	2.68455	4.42
33034551	2	1	1	1	0		4	2.5		7				1	1	0	1	0	5			0	30								0	0	156.2	64.2	93.4	31.5	8.8	118	77	114	77	120	70	4.8	1.13	1.31	2.97636	4.94
33034552	2	2	1	1	0		6	2.8		7				1	0	8	1	0	3			3	0								0	0	154	68.6	89	34.2	10	129	77	122	75	125	71	5.22	1.35	1.01	3.59636	4.57
33034553	2	2	1	1	0		16	0.2						1	1	0	1	1	0												0	0	149	49.4	72	26.5	5	120	79	118	75	121	80	4.98	0.58	1.5	3.21636	5.34
33034554	2	1	1	1	0		4	2.1	4	2	1			1	0	7	2	0	6	7	0	0	20	0	20					0	9	0	155	68.7	95.6	34.9	11	150	86	144	87	144	86	6.73	1.57	1.03	4.98636	6.65
33034555	2	1	1	4	0		10	4.5		7				1	1	5	3	2	0			2	0								0	1	157	69.6	93.2	35.2	11	114	72	119	70	116	68	4.3	0.83	1.21	2.71273	7.15
33034556	2	2	1	1	0		5	99.9						1	0	6	1	0	2												0	0	157	62.5	83	30.3	7	98	63	99	60	99	59	3.5	0.62	0.82	2.39818	5.24
33034557	2	1	4	4	0		1	0.4		7				1	0	6	1	0	3			0	20							2	9	9	154.3	65.2	94	38.7	12	137	58	143	66	138	60	5.03	1.67	1.21	3.06091	6.52
33034558	2	1	2	1	0		2	1	1	7	7			1	0	4	1	0	3	5	0	0	15	0	10						0	1	150.2	51.2	77.2	31.6	6	122	81	125	78	126	77	5.01	0.94	1.55	3.03273	4.77
33034559	2	1	1	1	0		99	99.9		7	3			1	1	1	1	0	5			0	30	0	30					2	9	1	152.4	56.8	77.6	33.1	7	155	95	150	93	151	93	6.27	1.77	1.43	4.03545	7.05
33034560	2	1	1	1	0		3	1.5		7				1	0	7	1	0	4			0	30								0	0	154.8	64	85.8	32.8	9	141	77	134	78	135	79	4.28	2.38	0.8	2.39818	4.77
33034561	2	2	1	4	0		4	99.9		7				1	1	0	1	0	8			1	0								9	9	149.8	63.9	87.2	36.5	10	130	86	132	85	127	79	5.05	1.55	1.3	3.04545	5.31
33034562	2	1	1	4	0		6	2		7	3			1	0	6	1	0	5			4	0	0	40					2	0	0	146.3	52.3	83.2	35.7	8	138	62	133	63	136	66	5.26	1.52	1.49	3.07909	4.99
33034563	2	1	4	4	0		1	0.4		3				1	0	5	1	0	2			0	20								0	0	148.7	50.8	91	34.6	7	156	78	150	76	150	73	3.99	0.76	0.85	2.79455	4.87
33034564	2	1	2	1	0		3	1.2	6	7			2	1	0	4	1	0	3	1	30	0	15					0	25		0	0	152.8	48.2	89.6	25.3	4	116	74	111	71	115	70	6.44	1.11	1.15	4.78545	6.15
33034565	2	1	1	4	0		2	0.8						1	0	4	1	0	4											2	0	0	144.8	53.7	90.6	999.9	999.9	160	70	154	68	161	72	5.91	1.32	1.3	4.01	5.33
33034566	2	1	1	1	0		5	2.5		7				1	0	5	2	0	3			0	35								0	1	155.5	57.7	80.8	31.5	6	103	66	100	63	97	62	4.01	0.42	1.26	2.55909	4.07
33034567	2	3	4	1	0		2	1		7				1	0	9	1	0	5			9	0								0	0	153.2	66	84.8	35.2	10	132	79	128	81	126	79	4.47	1.24	1.49	2.41636	4.54
33034568	2	1	1	4	0		4	1.5		7				1	0	6	1	1	0			5	0								0	0	151.1	55	76.2	33.4	7	123	73	120	70	118	67	6.03	2.06	0.97	4.12364	4.33
33034569	2	1	1	1	0		2	1.6		7				1	1	2	1	0	3			10	0								0	0	156.2	70.4	91.2	35.3	9	134	81	132	81	128	83
33034570	2	1	4	4	0		6	2.8		4				1	0	9	1	0	4			0	30								0	0	146.4	44.7	73.2	35.2	5	152	56	147	51	148	53	3.66	0.94	1.47	1.76273	4.89
33034571	2	1	1	4	0	1	2	1.5	1		1	1	1	1	0	5	1	0	8	1	0			1	0	1	0	1	0		0	0	146.6	43.5	70.2	34	5	138	70	138	71	131	68	6.94	0.9	1.39	5.14091	5
33034572	2	1	1	4	0		2	0.9		7				1	0	8	1	1	0			4	0								0	0	152.1	52.9	84.2	32.4	6	94	57	93	54	96	54	6.12	0.7	1.34	4.46182	5.17
33034573	2	1	1	4	0		3	99.9	1	7				1	1	0	1	1	0	1	0	1	0								0	0	152.4	52.8	77.6	30.8	5	121	69	117	66	112	63	3.69	0.99	0.95	2.29	4.58
33034574	2	1	1	4	0		3	1.2		7				1	0	6	1	2	0			6	0								1	0	149.5	49.1	69.8	29.4	5	100	57	108	64	100	61	5.72	0.55	1.65	3.82	4.65
33034575	2	1	1	4	0		5	99.9		7				1	0	8	1	0	3			1	0								0	0	153.4	63	86.6	36.8	9	144	79	136	87	138	80	6.37	0.85	1.33	4.65364	7.07
33034576	2	1	1	4	0	0	3	1.3		7				1	0	5	1	0	4			0	20								0	0	164	60.9	75.4	28.3	5	114	61	113	61	111	57	3.51	0.6	1.3	1.93727	4.44
33034577	2	1	1	1	0		2	0.8		7	5			1	0	9	1	0	2			6	0	0	40						0	1	162	60.2	74.8	30.8	6	136	81	129	82	130	82	6.47	0.67	2.18	3.98545	5.91
33034578	2	1	1	1	0		2	99.9	6	7	7			1	1	5	1	2	0	2	0	1	0	0	30					2	9	1	160	61.7	83.2	32.8	7	152	94	161	88	157	90	4.46	0.83	1.68	2.40273	6.44
33034579	2	1	1	1	0	0	4	1.1		7				1	1	0	1	0	5			0	30							2	9	9	159	84.3	100.2	39.1	16	146	76	137	76	138	77	5.65	1.39	1.28	3.73818	7.12
33034580	2	1	1	4	0		4	1.3		7	2			1	0	5	1	0	5			2	0	0	15						0	1	156.1	63.8	92.6	35	9	109	63	104	60	111	60	5.97	0.61	1.65	4.04273	4.93
33034581	2	1	1	1	0		2	0.8		7				1	0	5	1	0	3			0	25								0	1	152	58.3	81.8	33.5	8	121	72	118	68	120	68	6.57	0.67	1.83	4.43545	5.58
33034582	2	1	1	1	0		3	1			3		2	1	0	5	1	0	6					1	30			0	30		0	0	150.6	52.2	78.2	37.2	6	125	78	120	75	119	75	6.78	1.39	1.77	4.37818	4.91
33034583	2	3	1	1	0		3	1.5		7				1	0	9	1	0	3			5	0								1	0	163	67.7	80	30.5	6	120	80	116	74	115	73	5.64	0.84	1.36	3.89818	5.76
33034584	2	1	1	1	0	1	4	2	7					1	0	6	1	0	3	5	0										0	0	152.8	44.8	64.6	19.7	2	110	66	108	63	107	64	4.36	0.54	1.61	2.50455	4.89
33034585	2	1	1	4	0		1	0.6		7				1	0	6	1	0	5			0	30								0	0	157	57.4	84	32.1	6	138	72	135	78	138	73	5.11	1.35	1.17	3.32636	4.56
33034586	2	1	3	4	0		1	1						1	0	6	2	2	0											2	9	9	158	43	97	999.9	999.9	165	74	163	70	160	71	4.17	0.58	1.03	2.87636	7.48
33034587	2	1	1	1	0		3	1.4	7					1	0	3	1	0	3	0	15										0	0	155	54.5	73	31.6	6	121	73	119	70	117	70	4.36	2.31	0.83	2.48	4.42
33034588	2	3	1	1	0		3	1.2		7				1	0	7	1	0	5			0	30								0	1	153	47.5	72	26	3	109	75	112	72	110	70	3.03	0.46	1.4	1.42091	4.71
33034589	2	1	1	4	0		5	2.2		7				1	0	8	1	1	5			10	0								0	0	151.5	62.4	90	37.1	11	130	72	132	73	130	70	7.66	2.89	1.14	5.20636	6.04
33034590	2	1	1	4	0		2	1	1	7				1	0	6	1	0	6	0	30	1	40								0	0	153	56.4	81	34	7	143	86	138	82	142	81	5.81	1.65	0.93	4.13	6.01
33034591	2	1	4	4	0		2	1		7	7			1	0	5	1	0	5			1	30	2	0						0	0	142	51	96	35	6	134	59	132	59	130	58	5.35	0.91	1.89	3.04636	6.13
33034592	2	1	1	1	0		2	0.9		7				1	0	8	1	0	5			0	20								0	0	152	59.9	81	31.4	6	134	71	135	74	140	75	4.21	1.02	1.1	2.64636	5.17
33034593	2	2	1	1	0		3	0.8	4					1	0	5	1	0	6	0	30										0	0	158.5	56.9	82	29.9	5	109	68	110	67	103	65	2.67	0.25	1.17	1.38636	4.27
33034594	2	1	4	4	0		5	2		7	2			1	0	5	1	0	4			1	0	0	30						9	0	154.5	69	99	36.5	11	129	80	130	79	127	77	2.62	0.88	0.69	1.53	4.72
33034595	2	2	1	1	0		3	1.2		7				1	0	4	2	0	5			1	0								1	0	167.5	69.9	89	37.8	9	102	61	101	61	104	64	3.53	0.53	1.27	2.01909	5.02
33034596	2	2	1	4	0		2	0.9		7	3			1	2	2	2	3	0			0	30	0	30						0	0	153.5	46.9	74	29.7	3	102	65	99	64	101	65	4.14	2.47	1.04	1.97727	5.03
33034597	2	1	1	1	0		5	1.5		7	7			1	0	8	2	0	5			1	0	0	30					2	9	9	152	50.2	75	32.9	5	142	83	140	81	144	75	3.38	0.84	1.36	1.63818	4.39
33034598	2	1	1	4	0		5	2		7	7			1	1	0	1	2	0			6	0	1	0						0	0	155	46	68	27.3	3	128	78	121	75	127	76	6.27	1.72	1.44	4.04818	5.89
33034599	2	1	4	4	0		1	0.5		7	1			1	0	8	1	1	0			0	30	2	0						0	0	146	40.2	81	999.9	999.9	134	52	138	58	135	63	5.11	0.9	1.38	3.32091	5.65
33034600	2	1	1	4	0		6	2	4	7				1	1	0	1	0	3	2	0	1	30								0	0	161	63.8	85	30.4	7	118	75	113	79	118	73	3.77	0.53	1.63	1.89909	5.27
33034601	2	2	1	4	0		2	1		7				1	0	7	1	0	5			0	30								0	0	161.5	82.9	98	36.8	14	114	75	113	75	115	74	4.82	2.4	1.13	2.59909	4.84
33034602	2	2	1	1	0		2	1.1		7				1	0	8	1	0	6			1	30								0	0	149.5	57.3	82	36	8	107	56	106	62	102	60	4.32	1.26	1.44	2.30727	5.39
33034603	2	1	1	4	0		2	0.4		7				1	0	5	1	0	5			1	0								0	0	158.9	52.2	76	30.3	4	127	77	122	74	127	75	3.78	0.28	1.46	2.19273	5.3
33034604	2	1	1	1	0		1	0.6		7				1	0	5	1	0	5			0	20								0	1	155	60.3	86	31.3	7	125	73	132	71	124	72	4.38	0.7	1.19	2.87182	4.9
33034605	2	2	4	1	0		5	1.9	7	7				1	0	7	1	2	0	8	0	4	0								0	0	163	71.9	92	35	9	158	94	154	94	152	92	4.46	0.45	1.76	2.49545	5.39
33034606	2	1	1	1	0		3	1.5		7				1	0	7	1	0	3			0	30								0	0	159	50.8	73	25.6	3	103	72	111	68	108	70	3.28	0.41	1.8	1.29364	5.36
33034607	2	1	4	4	0		5	2.8		7				1	0	9	1	0	4			0	30								0	0	151.5	67.8	98	35.5	12	109	63	109	64	110	62	5.36	0.31	1.74	3.47909	7.72
33034608	2	3	4	4	0		1	5		3	7		7	1	0	5	1	1	5			3	0	0	15			1	0		0	0	151	60.9	83	34.3	9	114	71	116	67	111	65	5.88	0.64	1.59	3.99909	8.3
33034609	2	2	1	1	0		3	1.5		7				1	1	0	1	0	3			0	30								9	1	161.5	59.3	83	31	5	116	73	113	73	117	77	4.34	0.61	1.22	2.84273	4.67
33034610	2	1	1	1	0		4	2.3		7				1	1	2	1	0	5			0	30								0	0	153	58.5	87	32.2	8	153	84	149	90	154	83	5.62	1.52	1.26	3.66909	4.74
33034611	2	1	1	4	0		3	0.4						1	0	8	1	1	0											2	0	0	141	42.6	74	39.4	6	159	83	161	77	155	79
33034612	2	1	1	4	0		6	1						1	1	0	2	0	6												0	0	150	42.5	64	27.9	3	113	60	110	62	111	60	4.96	0.67	1.47	3.18545	4.94
33034613	2	1	1	4	0		3	1.3		7				1	1	0	1	0	5			0	30							0	0	1	152.5	53.5	78	32.5	6	119	80	120	80	122	78	5.2	0.9	1.52	3.27091	5.17
33034614	2	2	1	4	0		1	1.2		7				1	0	8	2	1	5			0	50							2	0	0	149.1	55.3	81	36.7	9	119	69	117	65	115	64	5.62	1	1.86	3.30545	5.62
33034615	2	1	1	1	0		3	1.5		7	3			1	0	9	1	0	5			0	30	0	30						9	9	148	40.7	70	31.2	3	147	63	145	67	143	64	3.28	1.64	1.6	0.934545	5.51
33034616	2	1	1	1	0		2	99.9		7				1	0	8	2	0	8			0	10								0	0	146	54.3	82	31.6	8	136	77	132	78	130	73	5.09	0.95	1.25	3.40818	4.92
33034617	2	1		4	0		2	1						1	0	9	1	0	5											2	9	9	140.2	42.7	84.2	39.1	6	139	75	140	70	133	71	6.09	2.89	0.88	3.89636	8.44
33034618	2	3	1	4	0		3	1.2		7	1			1	0	5	1	0	3			2	30	0	20						0	1	159.6	60.9	75.4	31	6	126	80	129	82	134	78	3.5	0.34	1.35	1.99545	5.56
33034619	2	1	1	4	0		2	1		7	5			1	0	9	1	0	5			0	30	0	30					0	0	0	166.2	80.7	89.2	35.2	11	149	84	147	87	145	89	3.31	2.35	0.83	1.41182	4.93
33034620	2	1	1	4	0		2	99.9		7				1	1	3	2	0	3			0	20							2	0	1	158.4	84	98.6	39.6	17	148	75	153	77	154	77	6.65	2.97	1.14	4.16	6.61
33034621	2	1	4	1	0		1	0.5		7				1	0	7	1	0	5			0	30							2	0	0	142.4	44.9	67.1	33	6	126	82	129	80	127	84	3.63	0.74	0.91	2.38364	4.73
33034622	2	1	4	1	0		1	0.6		7				1	0	8	1	0	4			0	20								9	9	146.8	46.4	78	33.6	6	130	61	132	62	128	65
33034623	2	1	4	4	0		1	0.4		7	1			1	0	6	1	2	0			6	0	1	0					2	0	0	149.8	51.8	83	41.7	8	119	71	114	66	118	69	4.7	0.78	1.23	3.11545	6.07
33034624	2	1	1	4	0		2	0.9		7				1	1	0	1	0	6			0	30								9	9	154.8	48.1	71.2	29	4	168	97	171	101	169	93
33034625	2	2	1	4	0		3	0.9		7				1	0	6	1	1	0			7	20								1	1	161.9	68	91	32.8	7	114	70	119	70	112	73	4.03	1.29	1.16	2.28364	4.78
33034626	2	4	1	1	0		3	1.2		5				1	0	4	1	0	5			6	0								0	0	143.2	55.1	80.8	30.3	9	109	61	109	62	105	60	3.68	0.24	1.18	2.39091	5.5
33034627	2	2	1	1	0		5	99.9		7				1	1	0	1	0	5			2	0								0	0	153	54.1	75.4	28.9	5	107	71	108	72	102	68	2.7	0.15	1.04	1.60545	4.01
33034628	2	1	1	1	0		2	1		7	5			1	0	6	1	0	3			0	30	1	0					0	0	0	145.2	44	76.8	30	5	138	80	137	75	135	71	6.51	1.79	1.15	4.54636	8.37
33034629	2	1	1	4	0		1	99.9						1	1	0	2	0	5												1	0	159.2	79.5	92.2	39.2	14	131	77	138	75	132	75	4.64	1.18	0.78	3.32364	5.69
33034630	2	1	1	1	0		2	1						1	1	0	1	0	6												0	0	159.3	60.4	80.4	30.9	6	117	67	119	63	118	62	4.57	0.72	1.19	3.05273	5.02
33034631	2	1	1	1	0		2	1		7	3			1	0	5	1	0	3			3	0	0	15						0	0	165.4	72.7	90.2	34.9	9	124	73	122	68	125	68	3.38	0.89	1.32	1.65545	5.12
33034632	2	1	4	4	0		1	0.7		7	7			1	0	3	1	0	5			0	10	0	30					2	0	0	141.6	50	81.2	37	10	199	84	194	91	190	92	7.5	0.35	1.87	5.47091	5.46
33034635	2	2	1	4	0		2	0.8						1	0	8	2	0	6												0	1	153	51.2	76.4	34.6	5	120	75	123	76	128	69	4.09	1.34	1.11	2.37091	4.39
33034637	2	1	1	1	0		2	1		7	2			1	0	8	1	1	5			4	0	3	0					0	0	0	150	53.7	78	31	11	142	76	148	75	146	72	4.67	0.54	1.17	3.25455	5.47
33034638	2	1	1	4	0		4	1		7				1	0	6	1	1	5			3	0							2	0	1	157	57.6	76	29.2	5	156	88	158	92	155	87	5.65	0.99	1.18	4.02	5.34
33034639	2	4	1	1	0	0	5	1.1		7	7			1	0	9	1	0	3			1	0	0	20					2	0	0	153.5	54.5	76.6	34.1	6	191	91	193	100	187	93
33034640	2	1	1	1	0		2	1		7				1	0	8	1	0	2			0	30								0	1	153	63.6	87.8	24.2	9	154	92	149	96	148	92	5.93	2.12	0.84	4.12636	4.95
33034641	2	1	4	4	0		2	1		7	7			1	0	4	1	0	3			0	15	0	30					2	0	0	150.8	49.9	77.8	37.4	7	151	104	155	98	158	106	7.26	0.69	1.8	5.14636	5.74
33034642	2	1	4	4	0		1	0.6		7				1	0	5	1	0	3			0	20							2	0	0	145.8	43.6	78.2	41.5	6	152	84	147	88	150	85	4.38	0.61	1.57	2.53273	5.07
33034643	2	1	1	4	0		2	1.1		7				1	0	5	1	0	3			1	0								9	1	156.6	57.5	74.4	30.3	6	112	73	113	72	112	71
33034644	2	1	4	4	0		3	1.4		7	2			1	0	3	1	0	3			0	30	1	0						0	0	154	48.9	69.2	28	3	101	65	98	61	103	60
33034645	2	2	1	1	0		3	99.9		7				1	0	8	1	0	3			0	50								0	0	161.3	76.6	63.8	24.6	2	109	71	106	69	105	69
33034646	2	1	1	1	0		5	2.3		7	5			1	1	5	1	0	5			0	40	0	30						1	0	146.2	40.8	59.8	22.7	3	116	69	110	67	112	64	3.24	0.49	1.11	1.90727	5.31
33034647	2	3	1	4	0		5	99.9		7				1	0	8	1	0	3			1	0								1	0	152.4	49.5	85	25.7	4	107	72	103	72	109	70	3.94	1.49	0.92	2.34273	5.58
33034648	2	2	1	4	0		3	0.9		7				1	0	8	1	1	8			6	30								0	0	143	51.8	78.2	32.2	8	104	61	106	63	101	62	4.65	0.7	1.19	3.14182	5.01
33034649	2	1	1	4	0		2	1		7	2			1	0	4	2	2	0			1	0	0	30						0	0	141	39.1	64.2	27.1	3	133	62	128	69	130	64	3.63	0.33	1.56	1.92	5.23
33034650	2	1	1	4	0		2	99.9		7	1			1	0	8	1	0	5			0	30	0	20						0	0	149	45.3	69.4	33	5	108	70	110	71	109	69	4.48	0.43	1.4	2.88455	5.61
33034651	2	1	4	4	0		1	0.8						1	0	5	1	0	4												9	9	149.2	54.8	68	33.3	8	151	79	152	78	155	75	4.15	1.44	0.92	2.57545	5.13
33034652	2	1	1	1	0		3	99.9		7	6			1	0	7	1	0	3			1	30	0	40					2	9	9	152	74.5	98.2	38.7	17	127	68	132	69	124	61	4.7	1.44	1.15	2.89545	5.76
33034653	2	1	4	4	0		2	99.9		7				1	0	5	1	0	3			1	0								0	1	156	56	76.4	30.1	5	115	65	119	69	114	64	3.56	2.48	0.71	1.72273	4.39
33034654	2	1	1	4	0		3	1.4	7	7				1	1	5	1	1	5	8	0	1	0							0	0	0	143	43	71.4	32.2	5	184	93	181	91	178	88	5.83	0.7	1.69	3.82182	5.85
33034655	2	1	4	4	0		1	0.6		7				1	0	8	1	0	5			0	20							2	9	9	148.4	54.6	89.4	40.7	9	141	82	138	77	135	74	3.13	0.98	0.89	1.79455	5.39
33034656	2	1	1	4	0		2	0.9		7	7			1	0	8	1	1	5			8	0	1	0					2	0	0	150.8	64.8	91.8	39	13	120	82	126	84	127	81	4.01	0.9	0.89	2.71091	4.8
33034657	2	2	1	1	0		2	1	7	7				1	0	5	1	0	4	0	10	6	0								1	1	153	57.9	85.4	33.6	7	122	76	119	78	118	83	3.86	0.77	1.13	2.38	5.78
33034658	2	2	1	4	0		6	2		7	2			1	1	0	1	1	5			5	0	3	0					2	0	0	156.6	50.5	75.6	34.3	6	146	77	147	78	151	74	4.78	1.76	1.17	2.81	4.68
33034659	2	1	4	4	0		1	0.4			7			1	0	5	1	0	6					0	20					2	0	0	143	42.5	89	999.9	999.9	195	100	191	102	190	100
33034660	2	1	1	1	0		2	1		7				1	1	2	1	0	6			0	30								0	0	161	68.7	88.4	35.5	9	135	78	131	79	137	78
33034661	2	1	1	1	0		2	1		7	5			1	1	5	1	0	5			0	30	0	40					0	1	0	145.6	50	78.4	33.4	7	154	88	162	88	154	87	4.34	0.99	1.48	2.41	5.6
33034662	2	1	0	4	0		3	99.9		7				1	0	9	1	0	6			0	20								0	1	148	61.2	93	37.7	10	127	81	120	79	122	81	5.21	1.04	1.24	3.49727	5.31
33034663	2	1	4	4	0		2	8		7	3			1	0	5	1	0	4			3	0	0	30						0	0	146	42.4	77.2	36.3	4	112	66	114	67	114	65	3.68	1.18	0.69	2.45364	4.16
33034664	2	2	1	4	0		4	1		7				1	0	9	1	0	3			4	0								0	0	158.8	70.6	92.8	34.7	10	117	78	116	82	115	79	4.18	0.75	1.52	2.31909	5.8
33034665	2	2	4	1	0		2	1		7	5			1	0	7	1	0	5			0	30	0	30						0	0	155.4	50.7	74.2	28	4	107	69	109	74	111	68
33034666	2	1	1	4	0		2	0.8		7	7			1	0	5	1	0	4			0	30	0	15						9	1	149.6	69.6	101.8	35.8	14	114	76	113	76	117	72
33034667	2	2	1	1	0		2	0.5		7	7			1	0	9	1	0	5			8	0	0	30						0	0	156	67	83.6	35.2	10	132	84	127	83	123	81
33034668	2	3	1	1	0		2	1		1				1	0	9	1	0	4			0	30								0	0	150	57.6	84.5	35.5	8	131	77	130	78	128	73	3.7	0.69	0.91	2.47636	5.95
33034669	2	2	1	4	0		5	3.9		7	7			1	0	7	1	1	7			0	0	0	30						0	0	156.4	56.4	84.2	33.4	7	130	83	128	87	126	88	5.62	0.79	1.08	4.18091	5.68
33034670	2	2	4	4	0		3	1						1	0	5	1	1	3												0	0	150.8	61	88	34.7	9	124	70	117	70	119	69	5.32	2.27	0.8	3.48818	4.93
33034671	2	1	1	1	0		2	1		7	7			1	1	2	1	0	5			8	0	1	0						0	0	151	49.1	80	29.8	5	112	69	115	73	113	71	3.52	0.94	1.4	1.69273	5.19
33034672	2	1	1	4	0		2	1.6		7	4			1	1	2	1	0	6			0	30	0	30						0	0	144.2	60.3	92	39.3	17	156	55	149	61	146	63	4.28	1.78	0.81	2.66091	6.33
33034673	2	1	4	4	0		1	0.4		7	7			1	0	6	1	0	3			0	20	0	30					2	0	0	135.6	39.7	81.6	999	999	150	66	156	63	158	62	5.2	1.24	1.59	3.04636	4.99
33034674	2	2	1	1	0	0	1	0.8		5	5			1	0	4	1	0	3			8	0	4	0						0	0	148	59.4	96	34.1	10	142	73	140	76	133	71	5.49	0.76	1.26	3.88455	6.76
33034675	2	3	1	4	0		4	1.8		7				1	0	6	1	0	3			1	0								1	1	156.4	55.9	75.3	29.8	5	111	76	108	69	103	69
33034676	2	1	1	1	0		2	0.8		7	2			1	0	6	1	0	5			1	30	1	0						0	0	154	46.6	70	24.5	3	133	71	126	73	126	75
33034677	2	3	1	1	0		3	1		4	3		3	1	0	6	1	1	0			0	30	0	30			0	40		1	0	166	56.6	74	28.6	3	101	52	103	55	94	55
33034678	2	1	1	1	0		3	1.8		7	5			1	1	0	1	0	5			0	30	0	30					2	0	0	146	57.9	85.8	36.9	10	131	89	132	87	133	85
33034680	2	1	4	4	0		1	0.4			7			1	0	8	2	0	8					0	30					1	9	9	145.8	40.6	69.8	27.3	3	184	106	181	98	178	100	4.13	0.41	1.86	2.08364	5.74
33034681	2	1	4	4	0		1	0.6		7	3			1	0	8	1	0	5			0	20	0	30					2	0	0	140.6	41.5	71	35.3	6	156	83	152	85	151	81	3.86	0.5	1.89	1.74273	5.37
33034682	2	1	1	1	0		2	1		7	7			1	1	0	1	0	5			0	15	0	55					0	0	0	157.6	49	73.6	35.1	4	156	94	150	89	150	94	3.4	0.23	1.43	1.86545	5.02
33034683	2	2	4	4	0		2	0.5		7				1	0	2	1	0	3			2	0								0	9	150.8	43.8	87.4	31.9	3	130	76	126	71	122	71	5.62	0.72	2.09	3.20273	5.01
33034684	2	1	1	1	0		2	1		5	2		3	1	0	5	1	0	5			3	30	0	10			0	20	2	9	1	146.4	48.8	80	23.4	2	135	66	135	66	130	66	5.42	0.69	1.41	3.69636	5.23
33034685	2	1	1	1	0		2	0.8	3		3			1	0	5	1	0	5	8	0			0	20						0	1	154.4	56	81.3	34	7	105	68	105	69	112	67	5.88	1.45	0.87	4.35091	4.49
33034686	2	2	1	1	0		3	0.5		5			5	1	0	4	1	0	3			0	20					0	20	2	0	0	158.8	59.1	84.8	33.1	7	136	73	136	71	135	73	4.87	0.44	1.38	3.29	5.99
33034687	2	1	4	4	0		1	0.4		7				1	0	3	2	1	0			2	0							2	9	9	150.4	51.2	71.8	37	7	143	78	138	74	135	77	6.37	1.83	1.16	4.37818	5.83
33034688	2	1	4	4	0		1	99.9						1	0	8	1	0	6											2	0	0	145.4	56.4	93.2	999.9	999.9	201	79	204	80	195	78	6.21	0.94	1.95	3.83273	6.28
33034689	2	2	1	4	0	1	2	0.6					5	1	0	6	1	0	2									0	20	2	0	0	158	67.5	87.6	36.9	11	156	85	153	84	155	84	4.17	0.79	1.07	2.74091	5.56
33034690	2	1	4	4	0		1	0.5						1	0	6	1	0	1												0	0	143.6	44.3	72.2	999.9	999.9	115	67	117	64	120	69
33034691	2	1	1	4	0		2	0.9		7				1	0	8	1	1	0			1	0							2	9	9	150.4	41.4	79.6	34.8	4	141	80	140	78	137	72	4.68	1.33	1.04	3.03545	6.13
33034692	2	1	4	4	0		1	0.6		7				1	0	9	1	0	4			0	30								0	0	147.4	58.5	87	999.9	999.9	164	86	160	86	167	85	4.18	1.46	0.96	2.55636	6.34
33034693	2	1	1	4	0		2	1		2	1		7	1	0	6	1	0	5			0	30	0	10			0	30	2	9	0	149.8	63.2	88	37.7	12	115	70	108	72	112	69	5.29	0.61	1.47	3.54273	9.08
33034694	2	2	1	1	0		2	0.5						1	0	5	1	1	0												0	0	150.2	46.4	70.5	31.5	5	112	69	110	69	110	67	6.22	1.03	1.24	4.51182	5.04
33034695	2	1	1	4	0		2	0.4		4				1	0	7	1	0	3			2	0							2	0	0	140	44.5	86.4	34.5	7	171	76	169	82	162	79	5.41	0.69	1.76	3.33636	5.83
33034696	2	1	4	4	0		1	0.8		7			7	1	0	6	1	0	4			0	10					0	20	2	9	9	149.4	57.6	85.4	43.3	11	144	64	140	69	138	64	4.86	3.53	0.99	2.26545	6.29
33034697	2	1	4	4	0		1	0.7		7				1	0	9	1	0	4			0	20								9	9	149.6	49	73.6	999.9	999.9	125	81	120	78	124	73	3.71	0.56	1.38	2.07545	4.31
33034698	2	1	4	1	0		1	0.7		7				1	0	8	1	0	5			0	20								0	0	140.2	41	74.4	32.7	5	116	78	108	76	109	70	4.67	0.64	1.17	3.20909	5.44
33034699	2	2	1	1	0		2	1		4			7	1	0	6	1	0	5			1	30					0	30	2	1	0	152.6	54.4	79.6	29	7	117	76	121	77	120	75	6.01	0.83	1.8	3.83273	5.3
33034700	2	1	4	1	0		1	0.6		7	3			1	1	5	1	0	5			0	20	0	30					2	0	0	151.4	50.8	69	30.8	5	141	63	142	68	148	66	6.35	0.8	2.19	3.79636	5.25
33034701	2	1	1	4	0		2	1.2		7				1	0	9	1	0	5			0	20							2	0	0	149.6	58.9	81.8	38.8	10	134	69	128	62	128	66	5.27	0.85	1.1	3.78364	5.64
33034702	2	1	4	4	0		1	0.6		7				1	0	2	1	0	2			1	30							2	9	9	150.8	40.4	62	32.5	3	134	78	128	82	131	78	6.25	0.86	1.44	4.41909	6.15
33034703	2	1	4	1	0		1	0.6		7				1	1	2	1	0	3			0	20							2	0	0	146.6	55.6	83.5	37.3	11	144	80	144	72	140	72	3.83	0.48	0.89	2.72182	5.51
33034704	2	1	1	4	0		2	0.5		7				1	0	4	1	0	5			0	30								0	0	154.6	58	82	38	9	139	76	137	76	135	74	3.02	0.52	1.23	1.55364	6.88
33034705	2	1	4	4	0		2	1.2		7				1	0	9	1	0	5			0	30								0	0	141	44.7	81.4	41.9	8	117	58	119	65	117	65	5.03	0.66	1.34	3.39	11.63
33034706	2	1	1	4	0		2	1.2		7			3	1	0	6	1	0	4			0	10					0	15		0	0	146.2	52.2	81.6	41.6	9	117	65	118	62	120	62	5.74	1.19	1.58	3.61909	5.42
33034707	2	1	1	4	0		4	1.5		7				1	0	5	1	1	0			1	30							2	0	0	146.4	45.7	83.3	44.1	6	137	80	140	83	141	80	5.03	1.04	1.2	3.35727	9.01
33034708	2	2	1	1	0		2	0.8		7	4			1	0	6	1	0	2			0	30	0	30					2	0	0	149.7	58.7	83.4	37.9	11	143	75	140	77	138	76	3.14	1.42	0.89	1.60455	5.67
33034709	2	1	1	4	0		2	1		7				1	0	6	1	0	3			0	25							2	9	9	151.3	46	66.2	35.2	4	121	65	123	62	125	64	3	0.54	1.25	1.50455	5.54
33034710	2	2	4	4	0		6	3.5		7				1	1	2	1	0	5			0	30							1	0	0	148.2	50.1	69.8	32.1	6	132	78	138	73	130	74	2.59	0.39	1.19	1.22273	5.43
33034711	2	1	1	1	0		2	0.8		7			3	1	0	8	1	1	0			1	0					0	30	2	0	0	152.8	64.9	95	40	12	136	62	131	63	128	62	4.63	1.38	1.03	2.97273	4.38
33034712	2	1	1	1	0		2	0.8		7	4			1	0	3	0					0	15	1	0						0	0	153	43.8	66.4	24.2	3	116	65	110	64	115	64	2.64	0.27	1.34	1.17727	4.71
33034713	2	2	1	1	0		2	1		7	7		7	1	0	6	2	0	4			1	0	0	20			0	30	2	0	0	147.4	84	84.2	37.8	15	134	74	131	70	138	72	5.38	1.28	1.54	3.25818	5.68
33034714	2	1	4	4	0		3	1.6						1	1	0	1	0	6												0	0	153	56.2	80.4	999.9	999.9	155	96	147	97	158	97	5.05	0.85	1.48	3.18364	5.46
33034715	2	2	1	1	0		3	1.1		7				1	0	6	1	1	0			8	0								0	1	154.1	48.9	4.2	26.4	3	103	64	96	64	96	61	4.68	0.53	1.97	2.46909	5.05
33034716	2	1	4	1	0		2	1	3					1	0	8	1	0	6	0	30										0	1	161.2	98.1	99.2	41.2	22	149	88	146	94	142	90	4.19	2.95	0.82	2.02909	5.72
33034717	2	2	1	4	0		3	1.1		7				1	0	3	1	0	4			1	30							2	1	1	153.5	52.5	69.8	32.9	5	130	80	130	80	125	80	5.95	0.46	1.36	4.38091	6.66
33034718	2	1	4	4	0		1	0.6		7				1	1	2	1	0	2			0	30								0	0	136.5	60	91.2	999.9	999.9	144	88	139	82	143	86	5.69	1.22	1.58	3.55545	5.28
33034719	2	4	1	1	0		3	1.1		7				1	0	5	1	0	4			0	30								0	0	152.8	53.6	73	26	4	128	72	125	73	120	72	4.38	0.65	1.24	2.84455	5.52
33034720	2	3	1	4	0		1	0.7		7				1	0	9	1	0	4			0	30								1	1	150	53.8	75.2	30.1	6	130	71	128	72	122	70	5.09	1.87	1.25	2.99	5.45
33034721	2	1	1	4	0		1	1.5		3	3		2	1	0	6	2	0	4			1	30	0	30			0	30		0	0	157.1	46	61	22.1	1	101	60	95	62	94	56	3.03	0.36	1.55	1.31636	5.13
33034722	2	1	1	4	0		1	0.6		7				1	0	2	1	0	4			2	0								0	0	159	52.9	75.2	30	9	113	70	107	70	112	70	6.1	0.48	1.83	4.05182	5.11
33034723	2	2	1	4	0		2	1.2		7	5			1	0	9	1	0	4			0	30	0	20						0	0	158.5	44.1	60.2	24	1	114	71	113	69	109	69	4.9	0.73	1.42	3.14818	4.88
33034911	2	1	1	1	0		5	3		7	7			1	0	6	1	0	6			9	0	2	0						0	0	154	49	72	19	3	140	76	141	80	138	79	5.08	0.69	1.7	3.06636	4.74
33034912	2	1	1	1	0		2	1		7				1	0	6	1	0	2			1	0								0	0	150	52.3	77.2	32.8	6	137	79	134	72	133	75	5.39	0.71	1.36	3.70727	5.91
33034913	2	4	1	1	0		4	3		7				1	0	4	2	1	0			1	30								0	0	147.7	42.4	63.8	23.1	3	116	67	116	67	115	65	3.1	1.18	1.13	1.43364	4.94
33034914	2	1	1	4	0		3	1.2		7	7			1	1	1	1	0	5			7	0	0	15						0	0	159	77.1	96.8	38.3	13	121	69	121	64	117	64	6.76	0.57	1.4	5.10091	5.84
33034915	2	1	3	4	0		3	99.9		7				1	0	8	1	0	5			0	30								9	9	154	66.6	89.6	38.1	12	134	64	129	64	126	62
33034916	2	1	1	1	0		2	1		7				1	0	7	1	0	3			0	30								0	1	162.5	75.8	90	36.1	10	131	79	128	72	129	74	2.59	1.79	0.86	0.916364	4.86
33034917	2	1	1	1	0		2	1		7				1	1	2	1	0	6			0	30							2	0	0	155.2	77.4	108	39.5	16	139	71	137	69	137	69	5.25	0.38	0.81	4.26727	4.27
33034918	2	1	1	4	0		5	99.9		7	2			1	0	8	1	0	5			4	0	1	0					2	9	9	153.4	51	84.8	33.7	5	141	71	143	68	144	66	5.66	2.02	0.89	3.85182	6.64
33034919	2	2	1	1	0		5	99.9		7			7	1	1	1	1	1	0			4	0					1	0		0	0	149.2	59.7	85.6	32.9	9	146	76	147	78	141	74	3.88	0.92	1.16	2.30182	5.07
33034920	2	1	1	4	0		2	1.2						1	0	8	1	0	5											2	9	0	165	60.4	79.8	32.4	6	146	82	144	79	141	75	5.31	1.72	1.22	3.30818	7.54
33034921	2	1	1	1	0		3	1.5		7				1	0	7	1	0	5			0	30								1	1	148.6	52.4	75.8	27.5	6	108	65	114	66	109	62	5.04	1.14	1.03	3.49182	5.34
33034922	2	1	4	1	0		1	99.9						1	0	4	1	0	6											0	0	0	142.2	47.4	78.8	999.9	999.9	175	83	170	77	172	80	5.54	0.9	1.06	4.07091	6.3
33034923	2	1	4	1	0		1	0.4		7	7			1	1	0	1	1	0			9	0	6	0					2	1	1	148.5	52.4	82.2	34.3	7	164	73	159	74	158	70	5.78	1.46	1.2	3.91636	4.85
33034924	2	2	1	4	0		2	2		7	7			1	0	4	2	0	4			0	30	1	0						0	0	141.4	45.5	90	40.2	8	148	79	140	7	145	72
33034925	2	1	1	1	0		2	0.9		7	7			1	0	6	1	1	0			8	0	8	0						0	0	156.8	36.9	68.2	21.6	1	141	81	141	78	143	80	4.38	0.5	2.1	2.05273	5.85
33034926	2	1	4	4	0		1	0.7		7	2			2	0	2	2	0	3			0	15	0	30						0	0	142	48.2	81	999.9	999.9	145	74	145	76	142	80	4.23	0.43	1.08	2.95455	5.26
33034928	2	1	1	4	0		4	1.8		7				1	0	9	1	0	4			0	30								0	0	159.1	56.9	75	32.3	5	117	74	115	71	120	75	5.17	0.54	1.91	3.01455	5.8
33034934	2	1	1	1	0		3	1.5		7				1	1	0	1	1	0			1	0								1	0	154.5	51.6	73	26.7	4	133	78	136	77	134	73	4.92	1.74	1.77	2.35909	5.15
33034941	2	1	1	4	0		2	1.2		7				1	1	1	1	0	5			0	30							1	0	0	160	68.4	92	36.5	10	139	93	138	92	143	90	6.5	0.99	1.41	4.64	6.02
33034942	2	1	1	4	0		3	1.2		7	7			1	0	5	1	0	3			0	30	0	15						0	1	154.5	52.8	81	29.6	5	140	88	136	82	136	89	3.66	0.47	1.37	2.07636	4.89
33034946	2	2	4	4	0		1	99.9						1	0	6	1	0	3												0	0	149.5	49.4	69	999.9	999.9	153	83	152	78	150	70
33034947	2	1	1	4	0		5	1.9		7	7			1	1	0	1	1	5			7	0	0	30						0	0	158	36.2	74	30.2	5	148	78	142	74	146	70	8.94	1.01	1.3	7.18091	5.21
33034948	2	2	1	1	0		2	1		7	1			1	1	5	0					0	30	0	30					2	0	0	157.5	55.5	80	38.1	6	106	63	107	63	102	63
33034949	2	4	1	1	0		3	99.9						1	1	0	1	0	5												0	0	148.8	62.4	80.1	38	14	96	64	100	65	101	68	4.07	0.66	1.17	2.6	5.12
33034950	2	1	1	1	0		2	99.9		7				1	1	0	1	0	8			0	20								0	1	157	56.3	85.4	32.7	10	114	71	113	71	116	66	5.84	0.36	0.92	4.75636	4.24
33034951	2	1	1	1	0		4	2.5		6	3			1	2	0	1	0	4			0	20	0	30					2	0	1	150.2	56.6	86.1	34.8	9	155	94	151	87	147	92	6.04	1.86	1.43	3.76455	7.46
33034952	2	2	1	1	0		5	1						1	0	5	2	0	4												0	0	152.8	55.9	77.2	28.3	6	149	85	144	84	140	83	5.33	0.78	1.57	3.40545	6.56
33034953	2	2	1	4	0		3	1.3		7	7			1	1	5	1	0	3			2	0	0	30						0	0	154.1	63.2	80.6	32.6	8	107	72	109	72	106	68	5.61	0.45	1.64	3.76545	6.01
33034954	2	1	1	1	0		5	2.2		7	7		7	1	1	2	1	0	5			4	0	0	40			0	40		0	0	159.3	68.2	87.2	33.5	8	103	62	109	62	106	63	3.17	0.68	1.1	1.76091	4.52
33034955	2	1	1	4	0		5	2.8	3	7	7			1	0	6	1	0	4	8	0	0	35	0	15						0	0	157.5	66.7	88.2	33.4	9	167	87	164	88	160	91	6.53	1.51	1.96	3.88364	5.56
33034956	2	2	1	4	0		3	1.2		7	7			1	0	4	1	0	4			1	30	0	15						0	1	159.7	73.8	85.4	35.3	100	128	68	126	66	123	69	4.64	0.74	1.2	3.10364	5.38
33034957	2	1	4	4	0		1	0.5		7				1	0	5	1	0	5			0	20							0	0	0	148.7	40.1	68.2	29.8	3	140	57	137	59	144	60	3.03	0.43	1.02	1.81455	8.51
33034958	2	1	1	4	0		2	1		6	3			1	1	1	1	0	5			0	25	0	30						9	1	150.6	51.9	75.8	29.2	6	109	64	104	56	107	56	5.04	1.25	1.25	3.22182	5.06
33034959	2	2	1	4	0		4	1.8		7				1	1	2	1	0	5			1	30								1	0	150.7	53.8	82.8	33.2	6	137	82	130	81	136	77
33034960	2	1	1	1	0		2	1		7	7			1	1	2	1	0	3			3	0	0	30						0	0	172.2	74.2	94.8	36.2	7	114	67	115	62	112	63	5.63	0.83	1.35	3.90273	5.28
33034962	2	1	1	1	0		5	2.5		7	7			1	0	5	1	0	3			1	0	1	0						0	0	151.8	50	68.2	30.9	5	111	78	114	77	116	76	4.76	0.52	1.57	2.95364	5.76
33034963	2	2	1	1	0		5	99.9		7				1	1	0	1	0	5			0	20								1	1	151	49.7	70.2	31.9	5	124	63	121	67	119	64	7.12	1.25	2.19	4.36182	4.55
33034964	2	2	1	1	0		2	1	7	7	7			1	0	5	2	0	4	3	0	0	30	0	10						0	1	152.8	50.3	72.8	28.8	4	111	67	102	68	103	68	4.33	0.72	1.41	2.59273	4.64
33034965	2	1	1	1	0		2	0.9		7				1	0	6	1	1	0			1	30								0	0	144.1	41.6	68.2	31.4	4	128	68	134	67	127	69	4.7	0.34	1.52	3.02545	5.37
33034966	2	1	1	1	0		5	2.5		7				1	1	0	1	0	5			0	30								0	1	155	72	92.2	36.8	12	125	68	117	68	122	67	4.7	1.25	1.02	3.11182	5.23
33034967	2	2	1	1	0		4	99.9		7				1	0	8	1	0	2			0	30								0	1	144	52.3	79.8	30.5	7	109	61	107	63	103	59	5.25	0.9	1.47	3.37091	5.16
33034968	2	2	1	1	0		1	0.4		2	7			1	0	3	1	0	5			0	15	0	40						0	1	156.3	61.5	78.6	31.9	7	123	85	121	81	116	78	6.01	1.39	1.29	4.08818	6.41
33034969	2	1	1	1	0		3	1.2		7	7			1	0	9	1	0	3			10	0	1	0						1	1	144.8	45.1	73.2	27.6	4	105	57	103	60	100	61	4.57	1.15	1.27	2.77727	4.98
33034970	2	1	1	1	0		2	0.9		5	3			1	0	8	1	0	5			0	30	0	30						1	0	163.8	60.1	77.4	28.1	5	125	70	123	69	127	68	5.8	1.4	1.24	3.92364	6.8
33034971	2	3	1	1	0		3	1.2		7	7		7	1	0	6	1	0	4			4	0	0	50			0	50		0	0	155	60	80.7	20	7	118	69	121	73	116	70	5.47	0.79	1.31	3.80091	7.11
33034972	2	1	4	1	0		1	0.6		7	7			1	1	0	1	0	3			0	20	0	30					2	1	0	153.4	47.3	79.2	32.7	4	142	88	144	92	140	87	5.95	2.68	1.1	3.63182	9.38
33034973	2	2	1	4	0		3	1.2		7				1	0	7	1	1	0			8	30								1	1	167.8	60.3	73.8	28.2	3	126	84	121	83	120	83	4.18	0.87	1.35	2.43455	4.92
33034974	2	1	1	1	0		4	1.8		7				1	0	9	1	0	4			9	0								0	0	155.5	51.6	70.8	25.4	4	123	69	131	65	127	64
33034975	2	1	1	1	0		4	1			1			1	0	6	1	0	5					0	30						0	0	156.4	76.1	86.8	37.1	13	124	78	122	81	118	78	4.96	0.49	1.4	3.33727	5.05
33034976	2	2	1	1	0		2	1						1	0	5	2	0	5												0	0	162.8	62.1	78.8	30.2	6	127	71	124	74	125	69	4.69	0.41	1.33	3.17364	5.22
33034977	2	1	1	1	0		2	1.2		5				1	0	5	2	3	0			0	30							2	0	0	164.6	63	77.6	29	5	126	85	131	84	125	80	5.2	2.2	0.75	3.45	5.45
33034978	2	1	1	1	0		6	2.7		7				1	1	5	1	0	3			6	0								0	0	155	57.2	81.2	31	7	154	84	148	81	151	81	5.36	1.21	1.06	3.75	4.74
33034979	2	3	1	4	0		4	2		7			3	1	0	6	1	0	4			0	30					0	30		0	1	166	64.9	90	27.9	5	119	59	117	66	114	62	5	1.12	1.49	3.00091	5.19
33034980	2	1	4	4	0		6	2.5		7				1	1	0	1	0	3			0	30							2	0	0	155	53.3	88	35.9	6	138	76	137	74	135	72	6.6	3.87	0.97	3.87091	6
33034981	2	1	4	4	0		2	1		5				1	0	8	1	1	5			1	0							2	0	0	151	40.3	61	26.5	2	141	73	140	70	138	70	6.39	0.77	1.45	4.59	5.72
33034982	2	1	1	1	0		3	1.2		7				1	0	6	2	1	0			0	45								0	0	148	54.4	91	32.5	7	114	71	110	70	116	73	5.26	1.01	1.24	3.56091	4.98
33034983	2	1	1	4	0		3	1.3		7	3			1	1	2	1	0	6			0	30	0	20						0	0	157	49.3	75	23.5	3	123	73	121	71	115	76	5.92	0.84	1.46	4.07818	13.36
33034984	2	1	1	1	0	0	1	0.5						1	1	5	3	1	0												0	1	153	56.5	92	32.5	6	120	78	127	82	125	80	3.66	1.73	1.23	1.64364	4.43
33034985	2	2	1	1	0		3	1.2		7				1	0	4	1	1	0			1	30								9	1	153	50.8	77	28.7	4	109	65	108	66	106	66	4.87	1.99	1.05	2.91545	4.25
33034986	2	1	1	4	0		2	0.7		7	5			1	1	2	1	0	5			0	30	0	25					2	1	0	159	63.7	95	37.3	9	152	78	148	86	146	84	5.84	1.56	1.16	3.97091	5.94
33034987	2	1	1	1	0		4	1.6		7				1	0	9	1	0	3			6	0								0	1	157	58.9	90	31.3	6	123	84	128	80	128	79	4.24	1.23	1.34	2.34091	5.6
33034988	2	1	1	4	0		1	0.7		4			5	1	0	4	1	0	5			1	0					1	0		1	0	156	48.8	67	22.3	3	96	60	101	58	93	56	5.03	0.64	1.48	3.25909	4.69
33034989	2	1	1	4	0		2	0.8		7	3			1	1	0	1	0	5			0	20	0	25					2	0	0	147.6	57.4	79	33.3	10	127	80	126	77	125	72	5	0.85	1.13	3.48364	5.32
33034990	2	3	1	1	0		2	1		7				1	0	5	1	0	8			1	30								0	0	149	49.4	69	28.3	5	131	75	133	74	139	74	4.69	0.9	1.26	3.02091	5.54
33034991	2	1	1	4	0		4	0.8		7				1	1	2	1	0	2			0	45								0	1	152.2	60.4	94	33.3	8	103	73	101	69	109	71	6.08	1.52	1.34	4.04909	5.79
33034992	2	1	1	4	0	1	4	1.6		7				1	0	6	1	1	0			12	0								0	1	153	98.3	90	35.9	8	173	76	175	78	175	76	5.24	0.88	1.23	3.61	5.72
33034993	2	1	1	1	0		5	2		7	7			1	1	5	1	0	5			6	0	1	0						0	0	149.6	41.4	62.4	25.2	2	101	68	96	63	102	60	4.99	0.35	1.54	3.29091	4.39
33034994	2	1	1	4	0		2	0.7		7	1			1	0	4	2	0	3			0	25	0	15						0	0	143	46.2	81	38.4	7.6	173	86	168	85	170	80	4.49	1.13	0.8	3.17636	4.63
33034995	2	1	4	4	0		3	1.2		7	1			1	0	8	1	2	0			5	0	1	0						0	0	168.4	62.1	78.4	29.1	5	113	62	107	60	103	68	5.46	0.55	1.21	4	5.12
33034996	2	1	1	4	0		3	1.2		7	7			1	0	4	2	0	4			1	0	0	30						1	0	160	63.2	85	31.3	7	118	76	113	74	121	78	5.37	1.06	1.76	3.12818	6.83
33034997	2	1	1	4	0		2	0.7		7				1	0	4	1	0	2			0	25								0	0	142.2	36.9	64	30	3	117	56	110	56	112	57	4.65	1.06	1.02	3.14818	5.47
33034998	2	1	1	1	0		2	1		7	7			1	0	9	1	0	3			8	0	0	40						1	0	152.3	56.9	78	34.7	7	173	108	170	105	175	107	6.32	0.5	1.75	4.34273	4.71
33034999	2	1	4	1	0		1	0.7		7	2			1	1	0	1	0	4			0	30	0	30					2	0	0	150	72.4	110	42.4	19	183	88	180	83	179	84	5.04	1.04	0.52	4.04727	4.34
33041001	1	2	1	2	0	0	2	0.3		4				1	0	4	1	0	6			5	30							0	0	0	172		94			124	80	124	79	115	67
33041002	1	2	1	1	1	1	7	3.5	7	7	7			1	2	0	1	1	0	6	0	2	0	0	20						0	0	171	75	88	22.2	12	136	84	129	83	129	78
33041003	1	1	1	4	1	1	2	1		5	3			2	0	2	2	0	5			0	30	0	15					2	0	0	159	54.4	79	27.1	8	178	95	161	89	156	88
33041004	1	4	0	1	0		6	3.5		7			1	1	0	4	1	0	2			4	0					0	30		0	0	168.4	62.7	76	11.6	5	119	84	131	77	123	76
33041005	1	2	1	1	0	1	6	3.5		5	7		1	1	0	8	1	0	4			4	0	0	30			0	30		0	0	172.4	93.5	99	30.8	22	147	87	136	89	143	93
33041006	1	3	1	1	1	1	3	1.5						1	0	8	1	0	5											2	0	0	158.2	54.5	85	28.6	8	157	113	149	105	148	104
33041007	1	2	1	4	0	0	2	1.2		2				1	0	5	1	0	3			0	30								0	0	166.2	62	84.6	23.2	9	120	76	114	80	107	75
33041008	1	2	1	4	0		2	1.5		5	7			1	1	5	1	0	5			2	0	0	30						0	0	166	58.8	82	24.8	8	144	68	146	69	140	66
33041009	1	2	1	4	0	1	2	1		4	7			1	0	8	1	1	0			2	0	1	0						0	0	165	49.5	73	10.7	3	123	65	121	57	115	64
33041010	1	3	1	1	0		4	2.5						1	1	5	1	0	5												0	0	164.6	65.6	88	23.7	9	139	83	122	76	134	77
33041011	1	1	4	4	0		1	0.3		3	7			1	0	3	2	1	0			0	30	2	0					2	0	0	155	65.4	90	27.4	18	148	72	146	71	141	62
33041012	1	2	1	4	0	1	2	0.5		3	7			1	1	0	0					4	0	1	0						0	0	156	52.3	74			132	59	132	58	118	58
33041013	1	3	1	2	0	1	7	1.2			5			1	2	0	1	2	0					0	15						0	0	168	73.8	88	24.2	14	125	77	128	72	117	74
33041014	1	4	0	1	0		4	1	3	6	7			1	1	7	1	10	5	0	30	8	0	0	30						0	0	179.4	76	84.4	17.1	7	125	66	124	60	119	60
33041015	1	3	1	4	1	1	6	5		3	7		5	1	2	0	1	5	0			5	0	5	0			3	0		0	0	162.2	59.3	85	25.3	9	138	83	141	83	142	85
33041016	1	2	1	2	0		2	1		2	5			1	0	7	2	2	0			3	30	2	0						0	0	167.4	58.6	83	29.7	8	137	73	139	85	129	80
33041017	1	1	1	4	0	1	2	0.5						1	1	0	1	1	0												0	0	163.4	55	85.8	32.3	7	142	56	133	57	139	61
33041018	1	2	2	2	1		2	0.2		4	5			1	1	5	1	1	5			1	0	0	20						0	0	156.6	58.6	79	22.2	11	130	80	119	78	115	79
33041019	1	2	1	4	0	0	7	3.6		2	4			1	0	5	1	0	3			2	30	0	30						0	0	165.2	81.2	98	30.7	19	157	96	148	86	148	86
33041020	1	1	1	4	0	1	6	1		7	7		6	1	1	1	1	0	5			0	30	1	5			0	30		0	0	158	49.2	73	18.3	5	122	72	120	62	113	71
33041021	1	1	2	2	0		2	0.3			3			1	1	5	1	1	5					0	30						0	0	173	59.7	76	19.2	6	157	73	158	78	135	75
33041022	1	1	1	4	2		2	0.5		3	6			1	0	6	1	1	0			2	0	1	0					0	0	0	157	59.4	84.2	27	13	183	97	183	90	172	94
33041023	1	1	1	4	0	1	2	1.6		7	7			1	1	5	1	2	0			11	0	0	20						0	0	163	66.1	91	25.8	13	134	82	129	83	125	81
33041024	1	2	1	4	0	0	3	1.5			7			1	0	3	1	0	5					0	30					2	0	0	159.4	61.7	87.5	19.6	11	129	67	128	68	128	69
33041025	1	1	1	4	0		2	0.8		3	7			1	0	5	4	0	4			0	30	0	50					1	0	0	170.6	64.8	85.3	27	9	136	89	133	87	129	85
33041026	1	3	0	3	0		3	0.5		3	4			1	1	5	1	1	5			0	20	0	20						0	0	173.4	50.9	70	8.4	0	119	67	115	70	117	68
33041027	1	2	1	4	2	1	2	0.7	7	7	4			1	0	9	1	0	4	0	30	0	30	0	20					0	0	0	169	73.2	90	29.1	14	129	99	156	73	142	98
33041028	1	2	1	2	0	1	2	0.5			5			1	1	5	1	1	5					0	20						0	0	166	86.2	102.5	31.5	22	197	92	158	83	162	83
33041029	1	2	1	4	1	1	2	0.5	2	6	7			1	0	5	2	1	0	2	0	4	0	1	0						0	0	171.6	62.4	80	22.3	7	113	75	128	76	116	78
33041030	1	5	0	3	0		4	1			7	1	2	1	0	5	1	0	5					1	0	0	30	0	30		0	0	162.2	42.2	61	8.5	1	102	66	98	62	98	60
33041031	1	5	1	4	0		4	0.4			4			1	1	5	1	1	5					0	30						0	0	159	46.9	63	7.2	2	108	59	103	61	107	59
33041032	1	2	1	2	0	0	2	1			7		7	1	0	5	1	1	0					1	0			0	40		0	0	167.4	59.1	80	21.8	7	117	59	121	58	118	60
33041033	1	2	1	4	0	0	6	1.5			7		7	1	0	5	1	1	0					1	0			2	0		0	0	162.2	66	87.5	24.5	13	147	85	146	79	136	79
33041034	1	2	1	4	0	1	2	1	4	4	4			1	1	0	2	0	8	8	0	3	0	2	0						0	0	171.8	55.3	70	15.5	4	104	61	103	57	99	57
33041035	1	3	1	2	0	0	7	1.6		4	4			1	0	6	1	0	8			0	50	0	30					1	0	0	162.4	61.5	89.6	27	10	196	94	186	96	182	86
33041036	1	1	1	1	0	1	2	1		7	7			1	1	0	1	1	0			2	0	1	0					2	0	0	153.4	57.2	86	27.5	13	139	85	139	82	131	80
33041037	1	2	1	4	1	1	4	0.8		4	7			1	0	8	1	0	6			0	25	2	0					1	0	0	168.2	59.6	82.2	18.2	7	153	97	136	90	147	90
33041038	1	3	1	1	1	1	6	1.5			7			1	0	8	1	1	0					0	30						0	0	162	70.1	91.3	22.2	12	129	80	130	72	135	71
33041039	1	1	1	2	0	1	2	0.4			3			1	1	5	1	1	0					0	20					2	0	0	154.2	68.8	97	32.3	21	137	72	120	74	124	74
33041040	1	2	1	1	0	1	3	0.8	7	7	7			1	1	1	1	0	5	8	0	8	0	0	30					1	0	0	164.4	77	96.4	25	16	172	102	170	94	156	95
33041041	1	2	1	4	0	1	2	0.7	7	7	7			1	1	3	1	0	8	4	0	4	0	1	30					1	0	0	153.4	55.7	84	31.4	13	182	103	173	95	157	92
33041042	1	1	2	2	1		2	0.3			4			1	1	7	1	1	5					0	30					1	0	1	170	74.7	91.2	27.2	14	136	76	116	73	120	74
33041043	1	1	1	1	1		4	0.7	2	6	7			1	1	0	1	0	5	7	0	18	0	0	40						0	0	178	89.3	97	28.5	16	160	109	162	107	152	98
33041044	1	2	1	1	1	0	4	1		7	5			1	1	0	1	0	4			9	0	0	30						0	0	181.2	71.3	85.4	20.3	7	126	77	123	72	117	73
33041045	1	2	1	1	1		2	1		7				1	1	0	2	1	0			8	0								0	1	169	59.3	76.9	24.1	7	124	61	113	64	119	74
33041046	1	1	1	4	1		5	1.2	5	5	7			1	1	5	2	0	4	4	0	4	0	0	30					1	1	1	175	68.8	79	20.5	8	138	95	130	91	131	92
33041047	1	2	1	4	0	1	4	1		7	4			1	0	8	2	0	3			2	30	2	0						0	0	169.6	68.1	84	23.9	10	148	93	152	97	146	91
33041048	1	5	0	1	0	1	4	0.8		3	3	2	2	1	1	5	1	0	5			0	40	0	20	3	0	2	0		1	0	165	68.6	84.2	26.1	9	116	70	115	73	117	73
33041049	1	2	1	4	1		5	0.8		5	5			1	1	5	1	0	9			1	40	0	30						0	1	172.2	72.7	87.5	21.6	12	118	88	107	59	118	75
33041050	1	1	1	4	1	1	3	1		7	4			1	1	5	1	0	6			1	30	1	10					2	0	0	171.6	92.6	103	30.8	21	142	99	147	99	139	89
33041051	1	2	1	4	0		2	0.4		4	7		7	1	1	0	1	0	2			2	0	3	0			2	0		0	0	173	63.9	76.2	19.1	7	114	70	108	77	102	69
33041052	1	2	1	1	1	1	4	1.6		5	5			1	0	7	0					1	10	1	10						0	0	167.8	59.6	78	19.5	6	165	94	143	93	145	92
33041053	1	3	1	1	1	1	3	1.5		2	7		3	1	0	3	2	1	0			2	30	0	35			0	35		0	0	165	63.7	83.2	23.1	9	104	70	113	69	116	68
33041054	1	2	2	4	0		5	0.5			5			1	1	5	1	1	5					0	30						0	0	183	89.6	96	25.6	12	123	68	117	69	114	70
33041055	1	4	1	1	1		7	1.6		3				1	0	9	1	0	8			0	30								1	0	173.2	54.5	71	14.8	2	116	68	115	65	110	66
33041056	1	2	2	4	1	1	7	0.5			6			1	1	5	1	1	5					0	30						0	0	163	56	76	26.4	7	104	70	104	70	124	78
33041057	1	1	1	4	0	1	2	0.3		7	7			1	0	5	1	0	5			0	20	0	30						0	0	163.2	57.1	77.4	23.9	8	145	86	145	88	143	83
33041058	1	3	1	1	1		3	0.3			5			1	1	5	1	1	0					0	30						0	1	169	77.8	87.6	25	14	124	64	124	74	123	68
33041059	1	4	2	1	1		5	0.3			5			1	1	5	1	1	5					0	30						1	1	173.6	85.9	86	25.9	13	119	71	122	76	114	69
33041060	1	2	1	2	0	1	2	0.3			5			1	1	5	1	1	5					0	25					1	0	0	167.2	65.5	82.5	24.3	10	104	70	186	111	170	111
33041061	1	1	2	4	1		8	0.6			5			1	2	0	1	2	0					0	30						0	0	166.4	77.1	83	27.2	15	130	94	126	92	114	93
33041062	1	2	1	4	0		2	1.2			7			1	0	6	1	0	2					2	0						0	0	159.6	46.2	70	21.7	3	131	82	126	80	142	81
33041063	1	5	1	1	0		3	0.8			3	5	5	1	1	2	1	0	6					1	0	1	0	1	0		0	0	170.2	74.7	82.3	21.3	10	134	81	136	78	135	94
33041064	1	1	1	1	1	1	3	1	1	2	7	7		1	0	4	1	1	0	2	30	1	30	1	0	2	10				0	0	165.4	58.2	73	13.9	6	152	99	156	106	159	103
33041065	1	2	3	4	1	1	2	0.4	2	7	7			1	0	7	2	2	0	0	30	0	30	0	30						0	1	172.2	71.1	87	21.1	9	118	79	115	72	113	75
33041066	1	3	1	1	0	1	3	1		7	7		3	1	0	5	1	0	5			0	30	0	30			0	30		0	1	173	68.9	81.2	24.2	8	133	92	131	93	154	90
33041067	1	3	1	4	1	1	3	0.8	7	7				1	1	5	1	0	6	5	0	5	0								0	0	174.6	81.1	88.4	25.3	12	136	79	134	76	139	70
33041068	1	5	0	3	0		4	1.5		2	3	2		1	0	8	1	0	5			0	30	1	0	2	0				0	0	176.6	50.4	62.5	9.3	1	118	70	123	66	117	67
33041069	1	2	1	1	0	1	4	1	4		7			1	0	6	1	0	3	1	30			1	0						0	1	169.6	71.3	84.5	21.3	11	139	83	125	79	122	75
33041070	1	3	2	4	1		3	0.5			5			1	1	5	1	1	5					0	20						0	1	165.4	55.5	73	16.1	5	122	80	131	82	128	77
33041071	1	4	2	1	1		3	0.3			5			1	1	5	1	1	0					0	25						0	1	169	62	81	21.2	6	130	70	119	69	114	64
33041072	1	2	1	4	1		2	0.4		5	7			1	1	0	1	1	0			0	40	0	30						0	0	164.6	80.7	100	31.2	20	132	82	129	81	130	80
33041073	1	2	1	1	0		2	1.2		3	7	7	2	1	0	8	1	0	4			0	45	2	0	2	0	1	0		1	1	177	72	87.1	21.8	9	164	77	160	100	158	91
33041074	1	3	2	1	0		4	0.3			6			1	1	5	1	1	5					0	30						0	0	168.6	69	89	22.5	9	132	83	140	80	129	82
33041075	1	2	1	1	1		4	0.5	2	4	7			1	1	5	1	0	5	0	30	0	40	0	30					2	0	1	174.4	75.6	90.5	25	11	167	109	160	109	161	111
33041076	1	4	1	1	1	1	4	1.2	4					1	1	0	1	0	9	0	15										1	0	160.2	52.7	74	13.7	5	113	68	110	68	112	67
33041077	1	5	0	1	0		3	1		5	3			1	0	8	1	0	3			1	30	1	30						0	1	174.2	62.3	73.9	14.4	4	133	83	123	73	120	74
33041078	1	3	1	4	0		4	0.5	3	4	7	2	3	1	0	5	2	2	0	1	30	2	0	0	30	0	15	0	30		0	1	173	57.1	68.8	11.5	3	125	78	119	72	112	68
33041079	1	2	1	1	2	1	2	1		7	5			1	0	6	1	0	5			10	0	2	0						0	1	166.4	72.1	90	28.5	14	116	74	121	80	116	72
33041080	1	2	1	1	1	1	4	1		7	7			1	1	5	1	0	5			10	0	2	0						0	0	164.4	78.9	103	29.1	19	122	72	121	71	113	69
33041081	1	4	1	1	0		2	0.2			7			1	1	5	1	1	0					0	30						0	0	171	57.9	70	13.2	4	118	76	121	72	115	71
33041082	1	4	0	1	0	0	3	0.6			7			1	0	5	1	0	5					0	30						1	0	172.6	76	84.6	25.6	9	149	73	131	62	122	72
33041083	1	3	1	4	0		3	1		4	4			1	0	8	1	0	3			1	30	1	45						1	0	171.4	57.3	73.6	15.8	4	105	70	101	61	103	66
33041084	1	5	1	4	0		4	0.3			7			1	1	5	2	1	5					0	30						0	0	169	78.5	83	26.7	12	124	65	122	63	112	63
33041085	1	3	1	1	0	1	3	0.3			5			1	1	5	1	1	5					0	30						0	0	176.6	67.3	73.5	16.7	6	111	76	111	70	104	73
33041086	1	2	1	1	1	1	4	0.8	5	5	4	4	4	1	0	8	1	0	8	5	0	5	0	0	30	3	0	3	0	2	0	1	177	82.5	97	24.1	12	163	111	149	111	149	112
33041087	1	3	1	4	1		3	0.5	2	2	7			1	0	5	1	0	5	0	10	0	30	0	20						9	9	174.6	48.3	67	17.7	1	100	65	110	68	107	67
33041088	1	3	1	4	0		4	0.5		3	7	2	4	1	0	5	1	0	5			0	40	0	30	0	30	0	30		0	1	166	63.9	78.6	18.2	8	146	97	139	98	138	99
33041089	1	3	1	1	1	1	3	1		5	5			1	0	5	1	0	5			8	0	1	0						1	1	168.2	69.1	81.6	18.8	10	116	78	113	78	117	78
33041090	1	1	1	1	0		6	1.5		7				1	0	6	1	0	5			5	0								0	0	167.2	62.5	81	23.1	9	125	76	126	71	116	74
33041091	1	4	2	1	1	1	4	0.2			7			1	1	5	1	1	5					0	20						0	1	170	60.6	76	16.2	5	114	62	108	62	113	61
33041092	1	5	0	3	0		3	0.5		4	7		3	1	0	4	1	0	5			0	30	0	40			0	30		0	0	177	62.8	69	10.6	3	111	73	110	72	111	71
33041093	1	2	1	1	1		4	0.8	5	5				1	0	9	1	0	8	10	0	10	15							0	0	0	172.2	80	93.4	26.5	14	152	99	155	93	141	99
33041094	1	2	2	1	2	0	5	0.3			7			1	2	0	1	1	5					0	30			2	0	1	0	1	168		113			190	120	192	122	189	120
33041095	1	3	2	1	1	1	4	0.2			7			1	1	5	1	1	5					0	20						0	0	177.6	65.4	85	20.9	6	133	82	120	79	125	81
33041096	1	2	1	4	0		4	1		4	4	3		1	0	8	1	0	5			1	20	1	30	1	30				0	1	176	72.5	81	19.7	8	125	82	120	73	115	73
33041097	1	3	1	1	1	1	3	1.2		6	7	7		1	0	6	1	0	4			7	0	1	20	1	0				0	0	166	65.4	83.2	25.8	9	139	90	130	89	134	88
33041098	1	3	1	4	1	1	3	0.2			7			1	0	6	2	0	4					0	30						1	1	180	72.1	84.2	21.4	6	120	73	119	79	118	77
33041099	1	3	1	4	1	0	3	1.5			7		3	1	0	5	1	0	5					0	40			0	30		0	0	174	57.2	74	17.5	3	124	85	125	85	134	83
33041100	1	3	1	1	1	1	4	0.5	3	7	3			1	0	5	1	0	5	0	40	2	0	1	0						0	0	168.2	61.6	81	22	6	126	80	128	81	120	79
33041101	1	5	1	1	0		5	0.5			7			1	2	0	1	2	0					0	20					2	0	0	171.6	67.9	82	22.5	9	123	72	117	75	120	78
33041102	1	5	1	1	0		6	0.5		5	7		3	1	0	5	1	0	5			0	40	1	0			1	0		1	0	175.4	83.8	90	26.4	11	135	77	140	80	130	80
33041103	1	5	2	1	1		4	0.3			7			1	1	5	1	1	5					0	20						0	1	174.2	64.3	76.7	18.2	5	114	72	108	64	106	69
33041104	1	3	1	1	0		2	1	2	2				1	1	2	1	0	4	4	0	4	0								0	1	173.6	79.5	91	23.4	12	134	88	127	81	127	83
33041105	1	3	1	1	0		3	1.5	6		7			1	1	0	1	1	0	5	0			1	0						0	0	176	79	87.1	23.9	11	137	86	130	86	132	84
33041106	1	3	1	4	1		4	0.5	7	7	7			1	0	5	1	0	5	12	0	12	0	0	50						0	0	167.4	74.2	88.2	21	12	133	77	118	68	122	86
33041107	1	3	1	1	1	1	4	1		5	3	4		1	1	0	1	0	2			7	0	1	0	1	20				0	0	172.4	74.3	89	27.4	9	116	71	120	72	116	67
33041108	1	3	1	1	0	1	3	0.8		3	5			1	1	2	1	0	4			0	45	1	0						0	0	167.2	60.5	74	21.9	6	128	83	115	73	112	69
33041110	1	2	1	1	0		8	0.6			5			1	2	0	1	1	0					0	30					2	1	0	173.6	84.7	96	26.6	15	124	77	124	77	121	79
33041111	1	3	1	1	1	1	4	0.3			7			1	2	0	1	1	5					0	20						0	0	170	76	89.5	25	13	143	85	131	81	123	85
33041112	1	3	1	4	1	1	4	0.5			7		5	1	0	8	1	0	5					1	0			1	30		0	0	168	69.4	86.2	23.4	10	136	88	127	87	123	90
33041113	1	2	1	4	1		6	0.6		4	6			1	1	2	1	0	4			1	50	0	30					1	0	0	169.3	65.8	86	22.5	10	131	80	149	81	129	80
33041114	1	3	1	1	1	1	3	0.8	5	3				1	0	8	1	1	0	8	0	2	0								0	0	159	57	80	17.4	8	118	69	111	56	111	57
33041115	1	1	1	4	0		2	0.1			7		7	1	0	6	1	0	5					1	0			1	0	2	9	9	156	49.8	74.5	19	7	132	72	134	72	124	78
33041116	1	2	1	1	1	1	2	0.5	5		3			1	0	7	3	0	3	12	0			0	30						0	0	172	49.7	71	15.4	1	128	96	128	95	134	92
33041117	1	1	1	1	2		4	1.6	2	5	7			1	0	7	2	2	0	3	0	5	0	0	40						0	0	160.6	59	81.5	16.6	8	114	70	115	68	110	66
33041118	1	3	1	1	0	1	4	1	7					1	1	0	1	1	0	2	0										0	0	169	74.9	88	23.2	11	142	86	128	83	130	83
33041119	1	4	1	1	1	0	5	1		7		3		1	0	6	1	0	2			1	0			1	0				1	1	179	86.2	89	24.5	12	131	57	126	73	123	64
33041120	1	2	3	1	1	1	3	0.5	4	7	7	7	7	1	1	0	1	1	2	7	0	0	30	0	20	7	0	0	30		1	1	180.2	67.3	82	20.7	5	154	91	155	81	161	85
33041121	1	1	1	4	1		2	0.4	3	4	7			1	0	4	1	0	5	10	0	5	0	4	0						0	0	161.5	57.9	80	19.3	9	150	85	146	83	144	91
33041122	1	4	1	1	1		4	0.8		4				1	0	9	1	0	8			0	30							0	0	0	168	81.8	98.5	26.6	16	135	85	136	86	150	95
33041123	1	4	1	2	1	1	2	0.6			7			1	5	0	1	1	5					0	30					1	0	0	159	48.9	74.5	23.8	5	174	80	173	84	182	83
33041124	1	3	1	1	1	1	5	0.8	7					1	0	8	1	0	2	4	0										0	0						112	75	115	78	110	78
33041125	1	1	1	4	0		2	0.8		5	7		3	1	0	4	1	0	5			0	20	0	20			0	20		0	0	154	68.2	90	32.2	18	140	89	143	87	130	80
33041126	1	3	2	1	1	1	3	0.8	3		7			1	0	3	2	2	0	15	0			0	40					0	0	0	165.5	62.6	81.2	15.8	8	149	100	143	95	133	96
33041127	1	1	1	1	0		10	1.5	7	7	7			1	1	0	1	0	5	5	0	2	0	5	0						0	0	166	61	80	18.4	8	130	79	123	74	120	80
33041128	1	5	1	1	1	1	8	2	6	1				1	1	0	1	0	2	2	0	0	15								1	1	182	74.4	80.5	19.1	6	129	86	120	84	123	79
33041129	1	1	1	1	1	1	2	1	4	3	7			1	0	7	4	5	0	12	0	0	30	0	30						0	0	169	59	94	16.3	6	136	81	132	79	134	76
33041130	1	1	1	1	0	1	2	0.7	5	5	7			1	1	2	1	0	5	9	0	9	0	7	0						0	0	144	54.6	77	28.7	16	144	81	152	76	146	76
33041131	1	1	2	4	0	1	2	0.2		5	7			1	1	5	1	0	5			0	20	0	20						0	0	156	52.2	75	20.1	8	107	74	111	74	103	65
33041132	1	2	1	1	0		5	2	4		7			1	1	0	1	0	2	10	0			1	0						0	0	163	58.1	82	24	8	118	66	119	64	109	64
33041133	1	2	1	1	1	1	2	0.8	7		7			1	0	5	1	0	3	4	0			5	0						0	0	159	49.5	75	23.1	5	108	73	102	77	112	79
33041134	1	3	1	4	1	1	5	1			7	7	7	1	0	6	2	0	6					1	30	1	30	0	30		0	1	159	61.9	86	26.2	12	173	100	154	93	160	96
33041135	1	1	4	4	0	0	1	0.3		5	7		7	1	1	5	1	2	0			0	30	0	30			0	20	0	0	0	164	60	78	23.3	9	159	93	158	90	152	92
33041136	1	2	1	1	0		7	2	4		7			1	1	0	1	0	5	3	0			0	30					2	0	1	162	75.6	91	26.5	18	134	81	138	84	136	83
33041137	1	5	1	1	0	1	6	0.3		5	7			1	1	5	1	1	2			0	20	0	30						0	0	169.5	54.1	63	11.6	3	105	62	103	61	100	63
33041138	1	3	1	1	0		7	2.8			2			1	1	0	2	0	9					0	20						1	1	166	57.9	74.5	17.7	6	103	76	104	60	102	56
33041139	1	2	1	4	2	0	6	99.9		7	7			1	1	2	1	0	4			1	0	2	0					2	1	1	157.5	63.1	88	22.3	13	164	93	139	76	141	78
33041140	1	2	1	4	0	1	2	1						1	1	5	2	1	0												0	0	162	73.9	96	28.4	18	117	85	117	86	110	85
33041141	1	2	1	4	1	0	6	99.9		7	7	7	7	1	1	2	1	0	5			0	40	6	0	3	0	3	0	0	1	1	162	69.4	70	24.2	14	178	84	170	85	160	82
33041142	1	1	3	1	1	0	2	0.5	5	2	7		7	1	0	5	1	0	5	10	0	0	30	0	50			2	0		0	0	161	63.8	87	23.5	11	133	80	117	76	120	80
33041143	1	3	1	1	0	1	5	2	7		7			1	0	8	1	0	5	0	30			0	30						0	0	169	75.9	87.5	24.6	12	129	76	124	72	123	74
33041144	1	2	3	1	0		1	0.2	3		7			1	0	7	2	0	4	8	0			0	30						9	9	169	71.3	87	20.1	10	150	72	138	78	140	79
33041145	1	2	1	4	0	1	3	1.2		7	7		7	1	0	5	4	0	5			2	0	2	0			1	30		0	1	177	94.9	103	29.3	19	173	99	142	93	146	100
33041146	1	2	1	1	1		3	0.2		5	7			1	1	2	1	0	7			0	20	0	20						0	1	170	61.6	83	18.8	6	130	84	129	82	130	82
33041147	1	4	0	1	0		3	99.9		7			7	1	0	9	2	0	2			8	30					0	20		0	1	168.2	59.3	73	18.6	4	102	77	103	60	103	70
33041148	1	1	2	4	0		2	0.3		7	7			1	1	2	1	1	2			0	20	0	30						0	0	162	69	92	29.6	16	127	60	134	60	120	70
33041149	1	3	1	1	0	1	4	0.3			7			1	1	2	1	0	8					0	30					2	0	0	158	58.4	78.5	25	10	158	93	158	96	155	95
33041150	1	4	1	4	0		6	1		7	7			1	0	5	1	0	3			1	0	0	30						0	0	177	74.6	78.5	19.8	8	125	69	118	68	116	69
33041151	1	2	1	1	1		9	1	5	7	7			1	1	0	1	0	4	2	30	10	0	1	30						0	0	175	70.2	84	15.1	8	119	54	95	50	133	56
33041152	1	4	1	1	0	1	9	1		7	5	4		1	1	0	2	0	2			10	0	1	30	1	20				0	0	177	78.6	84	22.8	9	138	76	128	74	119	72
33041153	1	2	1	1	1		3	0.7			7			1	0	5	1	0	5					0	30					2	0	1	171.5	70.5	87	22.6	10	130	90	128	88	127	88
33041154	1	2	4	4	1	0	4	99.9		7	7	2	2	1	0	6	2	0	8			2	0	1	0	0	15	0	15		0	0	166	63.3	82	26	10	130	90	119	84	121	78
33041155	1	1	1	1	2	1	5	2	7		7			1	1	0	1	0	3	5	0			3	40					2	1	0	169	68.3	86	19.7	10	125	83	119	80	120	82
33041156	1	3	0	1	1	1	2	0.8	3	6	7			1	0	5	1	0	2	3	0	0	30	5	0						0	1	168	63.2	70	15.9	6	129	67	126	65	127	65
33041157	1	2	1	4	1	1	4	99.9			7			1	0	6	1	0	2					3	0						0	0	162	48.5	75	28.9	4	128	87	127	79	130	78
33041158	1	3	1	1	0		4	0.8		7				1	0	2	1	0	5			8	0								1	1	172.5	64.8	82	17.7	6	145	72	124	74	122	75
33041159	1	3	1	1	0		3	0.8		1	7			1	0	5	1	0	4			1	0	0	40						0	0	164	64.9	90	26.4	11	116	57	106	72	114	50
33041160	1	4	0	3	0		4	0.8		3	7	2	3	1	0	2	1	0	4			0	30	0	30	0	45	0	30		0	0	171.5	56.2	67			134	74	125	65	120	80
33041161	1	3	1	1	1		3	0.7		2	7		3	1	0	5	2	3	0			0	30	1	0			0	30		1	0	164	61.4	74	19.9	8	110	69	120	68	120	67
33041162	1	3	1	1	2		4	1		7				1	0	5	2	0	3			9	0								9	9	170	77.5	93	24.1	12	143	86	137	87	142	86
33041163	1	2	1	1	0	1	5	2			7	1	1	1	0	6	1	0	5					0	30	0	45	0	45	2	0	0	163.7	69.1	94	24.5	12	146	91	137	88	134	84
33041164	1	4	1	1	1	0	3	1		4			1	1	0	5	1	0	5			2	0					1	0		1	1	166	73.6	94	27.1	14	135	83	115	79	120	80
33041165	1	3	1	1	1	1	4	1		7				1	1	0	1	0	3			7	0								0	1	169.2	66.8	86.2	20.7	9	145	92	136	90	138	87
33041166	1	3	1	1	1	1	4	1	7	7				1	1	5	1	0	2	8	0	2	0								1	1	162.8	57.2	76.5	18.3	7	110	66	108	64	109	57
33041167	1	3	2	1	0		3	1		6				1	0	5	3	0	8			2	0								1	0
33041168	1	3	1	1	2	1	4	1		7				1	0	5	3	0	5			2	0								9	0	168	61.1	79	22	7	126	74	119	77	121	69
33041169	1	4	0	3	0		5	1						1	0	7	1	0	2												0	0	173	64.3	75	18.7	5	133	69	123	70	123	64
33041170	1	3	1	1	0	0	5	0.8	7	7	4		7	1	0	6	1	0	6	2	0	0	50	1	10			0	50		0	0	164	67.1	84	21.3	11	135	87	127	82	132	84
33041171	1	3	1	1	1	1	4	1.5		7	7			1	0	7	1	0	5			1	0	0	30					0	1	1	172	75	86	25	11	127	81	125	80	113	83
33041172	1	2	1	1	0	0	3	0.8	3		7			1	1	2	1	0	8	7	0			0	20						0	0	162	58	77	21.7	8	140	69	137	73	139	88
33041173	1	2	1	1	1		3	1		7				1	0	6	2	0	2			5	0								9	0	173	70	87	18.3	8	127	73	121	69	120	75
33041174	1	1	1	1	0	1	4	0.2	7	5	7			1	1	3	2	1	2	10	0	0	20	0	25						0	0	161	61.1	75	15.3	9	133	78	124	73	120	80
33041175	1	2	1	1	1	0	3	1.2	5	3				1	0	6	2	0	5	2	0	0	40								9	9	163	53.1	75	11.8	5	112	62	108	61	108	57
33041176	1	2	1	1	1	1	4	1	5	2	7			1	0	5	2	2	0	6	0	0	30	1	30						0	0	164	60.5	84	20.5	8	138	81	128	76	126	81
33041177	1	3	1	1	1	1	3	1.2			5			1	1	5	3	10	0					0	20						1	0	164	71.4	88	21.4	13	128	80	126	72	129	74
33041178	1	4	1	1	1	1	5	2		7	7		7	1	0	6	1	0	3			1	0	1	0			1	0		0	0	170.3	81.9	94	24.4	12	118	75	113	71	110	73
33041179	1	2	4	2	0	1	1	0.2		7	7			1	1	2	1	0	7			0	10	0	15						9	9	158	59.6	85	24	12	111	80	121	78	124	81
33041180	1	5	1	1	0	0	5	0.8		5	4		4	1	0	7	1	0	7			1	10	1	20			1	10		0	0	170	69	81.5	21.9	8	128	75	131	76	120	71
33041181	1	5	0	3	0		3	0.2			7			1	0	3	2	2	0					0	20						0	0	173	60.2	74	11.3	3	124	65	109	62	116	61
33041182	1	4	1	1	0		6	0.4			6			1	0	6	2	2	0					0	20						0	0	164.5	64.8	82	22.6	8	137	71	125	67	124	68
33041183	1	3	1	1	1		2	1		7		1	1	1	0	4	1	0	2			8	0			0	30	0	30		0	1	164	65.8	80	21.5	11	124	73	116	71	123	69
33041184	1	3	1	1	0	0	3	0.8					1	1	0	8	1	0	5									1	0		1	0	181	71.7	81	18.6	18.6	137	82	133	77	128	79
33041185	1	4	1	1	1	1	4	1.5			7			1	0	7	2	0	2					0	30						0	0	165	70.4	88	23.8	11	113	81	114	75	115	83
33041186	1	2	1	1	1	1	4	99.9		7			4	1	0	5	1	0	5			7	0					3	0		0	0	171	69.8	83	22.7	9	139	88	123	82	120	80
33041187	1	2	1	1	2	0	2	1	5	7	7			1	0	6	1	0	5	10	0	1	0	0	30					0	0	0	161	55	72	18.2	7	148	85	144	75	144	79
33041188	1	4	1	1	1	1	5	0.3		7	5			1	1	2	1	0	8			1	0	0	30						1	0	175.3	60.8	77.5	15.6	4	125	78	124	67	120	80
33041189	1	3	0	1	1	1	3	1	5	1	6			1	0	6	1	0	2	1	0	0	30	0	30						0	9	181	109.8	109.5	31.3	19	122	74	116	67	120	80
33041190	1	2	1	4	0	1	2	0.3			7			1	1	0	2	2	0					1	10						9	9	163	57.3	88			200	98	201	81	174	94
33041191	1	1	1	1	1	1	4	0.2	3		7			1	0	3	1	0	8	10	0			0	20						0	0	158	47	71	11.9	4	112	63	105	65	108	65
33041192	1	1	1	2	1	1	6	0.3			7			1	1	2	2	1	5					0	20						9	9	152	47.7	76	18.3	7	130	105	132	86	109	70
33041193	1	2	1	1	1	0	4	2	3	3	7			1	1	0	1	0	5	0	20	1	0	1	0						0	0	177	76.7	92	22.8	9	120	71	113	75	120	75
33041194	1	4	1	1	0		3	1		7				1	0	5	1	0	4			0	30								9	9	163	69.7	88.5	25	10	118	68	115	58	108	58
33041195	1	2	0	1	1	1	3	1.2	7					1	0	6	1	0	2	1	0										0	0	168.5	55.1	73	10.4	3	99	57	98	57	103	59
33041196	1	3	1	1	0	1	3	0.8						1	0	9	1	0	3												9	9	169	87.4	96.5	28.7	17	125	90	119	89	141	85
33041197	1	3	1	1	0	1	3	1		7	7			1	0	8	1	0	3			1	0	1	0						0	0	176	61.2	75	16.6	4	138	82	137	79	132	79
33041198	1	4	0	1	0		5	1.6		1	7			1	0	5	2	0	3			7	0	0	20						0	0	168.5	64.9	82.5	27.4	7	133	83	130	84	130	83
33041199	1	2	1	1	0		3	0.5	4		7	4		1	1	5	2	1	0	3	0			0	20	3	0				1	0	166	71.6	90	27.5	14	129	78	125	79	121	80
33041200	1	1	1	4	0	1	2	0.8		7	7			1	0	7	2	1	5			2	10	0	40					2	0	0	158	54	85			180	88	185	90	187	91
33041201	1	3	1	1	1		4	0.3						1	1	5	1	0	6												0	9	170	69.7	88	19.3	9	129	84	134	89	136	89
33041202	1	2	1	4	0	1	2	0.6	5		5			1	0	9	1	0	5	7	30			0	10					0	1	1	177	77.9	87	26.6	12	156	95	144	90	137	91
33041203	1	1	1	2	0		6	1.4			7			1	1	2	2	1	5					0	30					2	0	0	171.5	72.2	98	28.2	12	142	90	145	91	146	95
33041204	1	2	1	1	1	1	4	1.6		7	7			1	0	3	2	2	0			8	0	0	30						1	0	167.5	66.3	83	23.5	9	114	83	120	82	114	80
33041205	1	3	1	4	1		5	0.4			7			1	1	5	2	1	2					0	20					2	0	1	164	81.4	99	27	18	130	95	124	88	133	92
33041206	1	2	1	1	1		4	0.4						1	0	8	1	0	4												0	0	162	52.9	72.5	21.1	6	127	82	122	80	120	79
33041207	1	2	1	1	1	1	2	1.5	7		7			1	0	8	2	2	0	3	0			3	0						0	9	168.3	65	86	28	9	132	97	130	90	133	90
33041208	1	3	1	1	2	0	4	1.5	7	7			7	1	1	0	3	0	2	0	30	5	0					5	0		9	9	164	55.5	74.5	19	5	128	77	123	76	124	78
33041210	1	1	1	4	1		1	0.8		7	7			1	1	0	3	1	0			0	30	1	0						0	0	158.2	55.5	79	23.8	10	167	94	160	90	160	89
33041211	1	2	1	1	1	1	3	1.2	7	3	7			1	0	8	1	0	4	4	0	0	30	0	40						0	0	159.5	58.8	81	22	8	118	76	119	72	115	75
33041212	1	2	1	4	1		4	1.4			7			1	1	5	1	0	4					0	20						0	1	178	93.2	101	29.5	18	124	78	118	83	121	85
33041213	1	2	1	1	0	1	5	1.2	7	7	7		7	1	0	4	1	0	3	0	30	0	20	1	0			0	20		0	0	166	59.8	78	25.4	8	130	92	130	90	130	91
33041214	1	2	1	1	0	1	8	2.5	7	1	7		7	1	0	6	2	0	5	0	30	1	0	1	0			1	0		0	0	162.5	70.7	90	25.1	14	136	86	132	84	140	84
33041215	1	1	1	4	0		4	1						1	0	6	2	0	2											0	9	9	166	60.6	81	20.4	8	128	74	124	71	120	73
33041216	1	3	1	1	1	1	7	1	3	7				1	0	6	3	0	8	8	0	8	0								9	1	164	72.8	91	23.8	11	116	63	123	67	117	62
33041217	1	4	1	1	0	0	3	1		1	7			1	0	6	2	0	4			1	0	0	15						1	0	164	52	72	19.9	4	120	81	117	72	120	73
33041218	1	1	1	4	1		4	0.8		7	7			1	1	3	1	1	2			0	20	0	20					2	0	1	172		92			149	98	149	93	140	95
33041220	1	3	1	1	1		4	0.8		5	7			1	0	5	2	1	5			0	20	0	20						0	0	171.5	85	90	23.6	14	133	85	138	87	140	76
33041221	1	3	1	4	1	1	5	1.2		4	3			1	0	7	1	0	3			2	30	0	30					1	9	9	158	52.3	77	29.6	8	145	81	141	81	140	80
33041222	1	3	1	4	1	1	3	0.7		2	7		2	1	0	5	1	0	3			0	15	0	30			0	30		0	0	162.5	63	86	17.1	9	122	75	118	74	115	70
33041223	1	2	1	1	0	1	6	1.8			3	7		1	1	2	2	2	0					0	30	0	30			1	1	1	170	72.4	86	24	11	126	80	119	74	125	77
33041224	1	5	1	1	0		4	0.6		3				1	0	5	0					14	0								0	0	169	71.9	86	20.1	9	128	74	122	70	120	68
33041225	1	2	1	1	2	0	2	1.6			7			1	1	0	2	2	3					3	0					2	0	0	164.5	69.4	87	26.6	13	200	107	196	103	194	102
33041226	1	1	1	1	1		5	1.2	3	5	7			1	0	8	1	0	5	0	20	1	0	2	0						0	1	167	77.4	98	28.4	17	123	79	114	76	116	76
33041227	1	2	1	4	1		2	1			7		7	1	0	8	2	0	7					0	10			1	30		9	1	168.5	58.9	78	21.6	6	105	66	100	67	103	67
33041228	1	1	4	4	0	1	4	1		7	5			1	0	9	2	1	0			0	30	0	45						0	1	163	56.9	78	26.4	8	140	79	142	77	136	84
33041229	1	1	1	1	0	1	2	1.5		7	7		7	1	1	0	2	1	0			1	30	1	0			1	30		0	0	157	52.6	87			133	76	140	80	146	77
33041230	1	1	1	2	0	1	2	0.2			7			1	0	8	1	0	8					0	20					2	9	9	163.5	56.7	87	22.8	7	160	80	155	81	159	76
33041231	1	2	1	1	0		2	0.8			7			1	1	1	2	2	5					1	30						0	0	163.5	56	81	23.3	7	136	80	131	83	130	77
33041232	1	1	1	4	2		2	2		4	4		2	1	0	8	1	0	3			2	0	1	30			0	40		0	1	162.5	65	80			117	86	125	85	124	85
33041233	1	2	1	4	1	1	2	0.7		3	3			1	0	5	1	0	4			0	40	0	40						0	0	161.5	51.2	71	21.6	5	110	66	115	64	110	66
33041234	1	1	1	2	0		2	0.5		3	7		7	1	0	9	2	2	0			1	0	1	0			1	0		0	0	163	51.2	70	26.7	5	132	77	124	71	127	72
33041235	1	2	1	1	0	0	4	1.2		6	3			1	1	2	2	1	5			4	0	0	30						0	0	171.5	53.4	71.5	19.2	3	143	88	143	85	142	83
33041236	1	1	1	1	1		2	2		5	7			1	1	5	1	0	3			1	0	2	0						1	0	170	75.5	92	31.4	14	140	76	136	74	140	78
33041237	1	2	1	4	0	1	2	0.3		7	7			1	0	4	1	0	2			0	20	0	40					0	9	9	159	64.5	90	33.1	15	148	69	154	71	154	77
33041238	1	1	1	4	1	1	2	0.4			1			1	0	8	2	0	3					0	30						0	0	162.5	57.3	82	24.3	8	142	71	149	75	150	80
33041239	1	1	1	2	1	1	5	0.8		7	7			1	0	9	2	2	0			0	20	0	20						9	9	163.5	53.1	78	22.9	6	115	63	113	62	106	60
33041240	1	1	1	1	0	1	6	1.5	2		7		3	1	0	8	2	2	5	10	0			0	20			1	0	2	1	9	163	56.9	79	19.4	7	145	85	149	87	148	92
33041241	1	1	1	4	1	1	5	0.5		5				1	0	8	2	0	4			6	0							0	9	9	168	57.8	79	24.1	6	133	84	125	82	124	85
33041242	1	3	1	1	1		3	0.5		5	7			1	1	3	1	0	8			0	20	0	20						9	9	182	80.9	98	27.4	9	120	75	117	75	112	71
33041243	1	2	1	4	1	1	2	0.7		3	2			1	0	8	2	0	6			0	25	0	30					1	0	0	165	73.1	99	34.8	18	148	85	139	81	145	82
33041244	1	2	1	1	1	1	3	0.9		7	7			1	1	2	1	1	3			7	0	1	30						0	1	172		91
33041245	1	1	1	4	0	0	2	0.8			7			1	0	7	1	0	5					0	10					1	9	9	162	65.9	89			124	69	138	67	132	71
33041246	1	3	1	1	0		2	0.8	7	7	7		3	1	0	6	1	0	5	0	30	1	30	2	0			1	0		0	0	168	71.8	92	26.2	11	128	82	123	81	120	75
33041247	1	2	1	4	0	1	5	0.8	5	2	7		5	1	1	0	1	0	5	2	0	1	0	2	0			1	0	2	0	1	166	79.9	98	29.6	18	151	93	145	85	143	91
33041248	1	2	1	1	1		5	2	5	2	7			1	0	5	1	0	5	2	30	0	30	2	0						0	0	177	77.5	92	24.3	11	132	79	131	75	127	73
33041249	1	1	1	4	2		2	0.8	2		7	3		1	0	8	2	2	0	2	30			1	30	2	0			2	1	1	173	87.2	98	26.1	17	174	90	163	81	165	82
33041250	1	2	1	1	0	1	6	1.5		3	7			1	0	9	2	0	6			8	0	2	0					2	1	1	158.5	55	80	26	8	168	96	163	94	164	90
33041251	1	3	1	1	0	1	6	1.3		7	7			1	0	5	1	0	3			2	0	0	30						0	0	169	74.1	90	27.1	11	118	68	114	73	110	77
33041252	1	3	1	1	1	1	3	1.2	7	7	7		3	1	0	8	1	0	5	0	30	1	30	0	30			1	0		0	0	169	49.4	71	16	2	108	69	113	66	111	66
33041253	1	2	1	2	0	1	2	0.5		5	7			1	0	9	1	0	8			0	20	0	20						0	0	160	57.9	79.5	24.7	10	131	78	132	81	133	80
33041254	1	3	2	1	0		4	0.8	1					1	1	0	2	1	0	0	15										0	0	169	54.8	73	16.1	3	121	70	114	68	115	68
33041255	1	2	1	2	0	1	6	1.5			7			1	0	9	1	1	0					0	25					2	1	0	164	64.2	87	20.8	11	138	73	138	82	135	79
33041256	1	2	1	4	0	0	5	1			7			1	0	8	2	1	5					1	30						0	1	168.5	69.2	98	29.5	11	135	74	132	79	129	76
33041257	1	1	1	4	1	0	2	1		7	7			1	0	3	1	0	2			0	30	0	30						0	0	168	58.8	80	25.3	7	132	66	131	62	127	67
33041258	1	3	1	4	0		2	0.8			7			1	0	8	2	2	0					2	0						0	0	172	66.5	89	23.9	9	125	77	127	77	120	75
33041259	1	1	1	4	0	0	5	2		2	7			1	1	0	1	1	0			1	0	0	30					2	0	0	166	55.4	80	14	5	134	74	136	77	140	82
33041260	1	1	1	2	2	1	5	0.6			7			1	0	9	1	0	8					0	20						0	0	162	58	87	20.9	8	125	76	125	83	129	81
33041261	1	2	1	4	0	0	2	0.6		5	7			1	0	4	1	0	2			0	30	0	30					2	0	1	164	66.3	89	30.7	13	137	72	131	70	130	69
33041262	1	3	1	2	0	1	5	0.8		7	7			1	0	9	2	1	5			0	20	0	20					2	1	1	168	62.1	82	25.3	8	153	85	146	84	146	79
33041263	1	1	1	4	0	0	2	0.7			7			1	0	8	1	0	5					1	30						0	0	157	53.7	82			142	72	139	70	134	70
33041264	1	1	4	4	1	1	4	0.8			7			1	0	8	1	0	3					1	0						0	0	157.5	55.3	81	30.3	10	116	65	111	69	108	64
33041265	1	3	1	1	1	1	4	1		7				1	0	5	1	0	2			7	0								9	9	168	73.5	91	19.1	10	115	81	120	75	117	74
33041266	1	3	1	1	2	0	4	1		7	7			1	1	0	2	0	7			8	0	1	0						0	0	165	68.8	90	23.8	12	197	110	190	108	197	103
33041267	1	3	1	1	0	1	4	0.8		2	7			1	0	8	1	0	5			0	10	0	15						0	0	169.5	56.9	74	21.7	4	112	84	114	76	114	74
33041268	1	2	1	2	1	0	2	0.8		4	2			1	0	9	1	0	7			0	40	0	30					2	0	0	173	76	102	29.4	13	148	90	148	95	146	89
33041269	1	1	1	4	0	1	7	1.2	7	7	7		7	1	1	2	2	1	5	4	0	1	0	1	30			2	0	0	0	0	162.5	75.1	94	28.2	17	142	86	141	85	139	83
33041270	1	3	1	1	0		3	1		7	4			1	1	0	2	3	0			6	0	0	30						1	0	172	77.6	90.5	26.5	12	132	89	134	90	128	92
33041271	1	1	1	1	1	1	9	0.9	3		7			1	1	2	1	0	8	2	0			0	20						0	0	170	70.8	90	27.7	12	144	83	149	81	141	86
33041272	1	5	0	1	1	0	3	0.5		1		2	1	1	0	9	2	0	4			0	30			1	30	1	0		0	0	168	55.4	73.5	13.5	5	119	74	126	69	121	66
33041273	1	1	1	4	0	0	2	0.7						1	0	5	2	0	2											2	1	0	169	59.8	88	20.9	7	145	75	145	69	136	71
33041274	1	2	1	4	1	1	3	1.3			7		7	1	0	6	2	0	5					1	0			0	30		1	0	163	61.7	84.5	26.2	9	124	74	120	74	122	74
33041275	1	1	1	4	0		5	0.4		2	5			1	1	0	1	0	3			2	0	2	0						0	0	181	72.6	87.5	27.1	8	125	84	121	79	121	78
33041276	1	1	1	1	1		2	0.8	5	5	4			1	1	0	2	0	6	6	0	3	0	1	20					0	0	0	172	62.3	81	20.6	7	150	73	146	69	140	72
33041277	1	2	1	1	1		2	0.4		3	7		2	1	0	9	1	0	5			0	30	1	0			0	20		0	0	174	64.1	77.5	16.6	6	134	80	135	75	132	74
33041278	1	3	1	1	0	0	3	1.2		3	7		7	1	0	6	1	0	3			0	30	0	30			0	15		1	0	170	55.5	77	24.2	4	120	82	115	79	112	74
33041279	1	1	1	4	1	1	3	0.8	1		7			1	1	5	1	0	2	7	0			0	40						9	9	160.5	60	84.7	23.7	10	134	72	130	67	133	70
33041280	1	2	1	4	1	1	5	1			7			1	0	9	1	0	3					2	0						0	1	160	70.5	94.5	30.7	17	147	87	138	89	143	89
33041281	1	1	1	4	1		10	1.7			7		4	1	0	3	2	1	0					0	30			1	30	0	1	1	165	70.9	86	25.3	14	136	87	130	89	132	87
33041282	1	1	2	4	0	1	2	0.5			7			1	1	1	2	2	0					5	0						0	0	168	70.8	84.5	23.6	13	147	80	138	75	138	77
33041283	1	2	1	4	0	1	4	0.8		7	7	7	7	1	0	9	2	3	0			1	0	2	0	0	15	1	0	0	0	0	169	75.2	90	24.9	14	110	71	112	75	118	79
33041284	1	1	1	2	1		2	1		7	7		7	1	0	6	1	1	0			1	0	1	30			1	30		0	0	157.5	58.9	89.5	27.4	12	140	72	148	76	140	71
33041285	1	3	1	1	1	1	2	0.4		4	7			1	0	9	1	0	5			1	0	0	30						0	1	169	57.2	80	19.9	6	110	66	114	71	110	66
33041286	1	2	1	1	1		3	0.4	7	7	7			1	0	6	1	0	5	2	0	5	0	0	30						0	0	164.5	55.8	74.5	14.6	6	96	56	99	55	96	49
33041287	1	3	1	1	1	1	5	1.5	5	3	7		6	1	0	7	2	0	5	0	10	1	0	2	0			0	20		1	0	171	62.9	81	19.6	7	156	80	151	82	144	82
33041288	1	1	1	4	0	0	4	1.2		4	4			1	0	8	1	0	3			5	0	2	0						0	0	164	53.8	70.5	19.8	6	120	66	123	66	127	73
33041289	1	2	1	1	0	1	5	0.4						1	0	7	1	0	4												0	0	171	68.9	80	17.4	8	112	82	112	78	112	81
33041290	1	4	1	1	0	1	7	1	2		2			1	0	7	1	0	5	4	30			0	20					0	0	0	164.5	57.2	77.5	20.1	7	126	90	121	88	117	85
33041291	1	1	1	4	1		5	1.4		3	7			1	0	4	2	0	3			0	40	0	30					2	0	0	163	60.1	84.5	21.7	9	168	108	166	103	170	101
33041292	1	2	1	1	0	0	4	1.2		4	5			1	0	6	1	0	8			3	0	1	0						1	0	162.5	47.7	74	18	3	93	65	99	66	96	64
33041293	1	5	1	4	1	1	5	0.8		7	7			1	1	2	1	0	8			0	20	0	20					0	0	1	175	85.4	94	28	12	149	93	142	86	140	86
33041294	1	5	0	1	0	1	4	1			3			1	0	9	1	0	2					1	0						1	0	166.5	61.6	76	19.9	6	110	64	106	66	104	66
33041295	1	2	1	4	2	1	4	0.7		7	7			1	1	2	1	0	7			0	20	0	20					0	0	0	166.5	68.1	85.5	26.5	11	118	76	121	72	115	75
33041296	1	2	1	1	0	1	7	0.8		7	7	7		1	0	8	2	1	0			8	0	2	0	1	0			2	0	0	171	66.1	86	23.1	9	136	82	131	78	129	81
33041297	1	3	1	1	0	0	3	1		7	7			1	1	0	1	0	5			6	0	0	30						1	1	171.5	74.6	89	21.5	11	120	72	117	73	116	71
33041298	1	1	1	1	0	1	2	0.8	2					1	1	2	1	0	4	0	45										1	9	173.5	76	89.7	25.5	12	133	84	132	81	134	80
33041299	1	2	1	1	1		2	1		7	7		7	1	1	4	1	0	5			0	20	0	10			1	30	1	0	0	170	80.9	104	31.9	17	134	78	139	78	136	80
33041300	1	3	1	1	1	0	5	0.7	7	3	4			1	1	0	1	0	5	1	0	1	30	0	30						0	1	175	60.6	76.5	16.7	4	122	76	116	67	115	72
33041301	1	3	1	1	0		3	1		6				1	1	0	2	0	2			6	0								0	1	170.5	63.8	78	17.1	6	132	73	132	68	124	74
33041302	1	2	1	1	1	0	5	0.8	7	7	7	7		1	0	9	2	2	0	0	30	10	0	2	0	0	30				0	0	158.5	58.8	81	24.2	11	100	61	104	62	102	63
33041303	1	1	1	1	1	1	5	1.8	2	7	7		7	1	1	0	2	0	5	4	0	1	0	2	0			0	30		0	1	164.4	49.7	70			114	60	109	63	110	60
33041304	1	2	1	4	0	1	2	1			7		7	1	0	3	1	0	3					0	30			1	0	2	1	1	168.2	64.9	91.5	26.7	10	136	77	129	73	130	74
33041305	1	2	1	2	0		5	1.5		5	4			1	0	8	1	0	6			2	0	0	40						0	0	164.4	64.9	85.5	27.6	12	138	72	133	69	130	71
33041306	1	2	1	4	0	1	2	0.8	2		7		7	1	0	9	2	1	0	2	0			2	0			0	30	2	0	0	152.8	57.8	78	20.3	13	141	85	147	85	143	85
33041307	1	4	1	1	0		5	0.8		7	7			1	1	2	1	0	8			0	20	0	25						0	0	170.1	77.1	93.3	22.1	11	123	72	124	71	121	71
33041308	2	5	1	3	0	0	3	1			7	5	2	1	0	6	2	1	5					3	0	0	30	1	0		1	1	171.5	66.2	80	19	6	115	66	115	69	109	67
33041309	1	2	1	1	0		4	1.2		7	7		3	1	0	9	1	0	5			0	30	1	0			1	0	2	0	1	176	86.4	96.3	26.8	16	119	81	121	80	115	79
33041310	1	3	1	1	0	1	4	0.6		7	7			1	0	8	1	0	8			0	20	0	20						0	1	166.5	64.6	82	20	9	133	76	141	77	132	78
33041311	1	2	1	4	1	1	4	0.6		7	7			1	1	2	1	0	8			0	20	0	20						0	1	158	54.4	76.5	22	7	120	84	116	88	124	84
33041312	1	3	1	1	2	1	5	0.8		7	7		2	1	0	9	1	0	6			6	0	3	0			2	0	0	0	1	168.2	79.4	91	28.4	13	150	95	148	99	141	98
33041313	1	2	1	1	0	1	4	1	7					1	0	8	1	0	5	9	0										1	0	158.5	63.2	86	22.6	11	124	85	127	86	122	88
33041314	1	2	1	4	1		2	0.5			7			1	0	6	3	0	3					0	30					2	0	1	167.5	55.5	72	21.6	6	145	69	137	68	138	70
33041316	1	1	1	4	0	1	2	0.4		3	7		7	1	0	5	1	0	5			2	0	2	0			1	30	2	0	1	168.5	64.3	83.1	18.9	9	170	93	163	93	170	91
33041317	1	3	1	1	0	1	4	1.2			3			1	0	6	1	0	2					0	40						0	1	165	50.4	68.5	18.2	3	126	83	128	78	120	74
33041318	1	1	1	1	1	1	5	1.2	7	7	7		7	1	1	4	1	0	6	7	0	6	30	1	20			1	10		0	0	168.4	68.8	84.5	21.5	11	137	82	149	88	143	80
33041319	1	2	4	2	0	0	1	0.3		3	7			1	0	6	1	0	5			0	30	0	30					2	0	0	156.5	49.4	71			137	75	130	73	130	73
33041320	1	2	1	4	1	1	2	1.5		7	7		7	1	0	8	4	1	0			3	0	0	30			1	0	2	1	1	164.5	62.5	87.5	27.7	11	176	67	171	68	180	70
33041321	1	1	1	4	1	1	5	0.7		7	7			1	0	9	1	0	8			0	20	0	20					2	9	9	170	65.2	89.2	24	9	144	81	147	79	145	79
33041322	1	1	1	4	1	1	2	1.3	7		7		3	1	1	5	2	0	7	2	30			0	40			0	30		0	0	166.5	75.4	93	25.3	15	132	86	137	82	140	85
33041323	1	2	1	4	1		5	1.2		7	7		3	1	0	3	1	0	3			1	0	1	0			1	30		0	0	161	53.1	74	20.2	6	120	63	126	61	118	59
33041324	1	2	1	1	0	1	6	1.6	2	4	4			1	0	7	1	0	6	1	0	1	30	1	30					0	0	0	174.5	72.8	91	23.2	10	152	93	152	95	143	99
33041325	1	1	4	2	0	1	2	0.4			7			1	0	9	1	0	8					0	15					2	9	9	149	54.1	82			164	88	164	86	155	86
33041327	1	2	1	1	1	1	8	1.2	7		7			1	0	6	2	1	3	1	0			1	0						0	0	174	64.3	84	14.2	5	122	70	118	62	117	67
33041328	1	2	1	4	0	1	2	0.8	2		7		5	1	1	3	2	1	5	1	0			2	30			1	0	2	0	1	166.5	66.1	82.9	26.7	11	148	73	155	72	150	73
33041329	1	2	1	1	1	1	5	1	7					1	1	5	1	0	3	4	0										1	9	162	57.9	79.8	16.8	7	106	66	107	70	106	63
33041330	1	2	1	4	0		5	1		1				1	0	9	2	0	3			1	0							2	0	0	167	75.9	93	27.6	16	137	78	141	80	132	77
33041331	1	3	1	1	1	1	3	1	2					1	1	0	2	1	0	0	30										1	0	161.5	50.5	67.5	11.9	4	125	64	120	64	117	57
33041332	1	1	1	4	0		2	0.8			7		3	1	0	3	1	0	2					1	0			0	30		0	0	163	67.3	83.5	26.4	14	152	82	145	84	146	84
33041333	1	1	1	4	1	0	1	0.8		7	7		7	1	0	8	1	0	4			4	0	0	50			1	0	2	1	1	141.5	44.4	65	12.2	10	190	77	188	75	184	78
33041334	1	1	1	2	1		5	0.8		7	7			1	1	1	1	0	8			0	20	0	20						0	0	172.5	59.7	78.5	27.8	3	127	70	118	64	119	67
33041335	1	1	4	4	0		1	0.7		7	7			1	1	0	1	0	3			0	30	1	0					2	0	0	161.9	69.7	93.1	30.2	17	130	80	135	73	131	80
33041336	1	2	1	4	0		6	1		7	7			1	1	0	1	0	5			0	30	1	0					2	0	0	161.2	62.6	76.3	18.8	12	138	88	138	83	137	86
33041337	1	1	1	4	0		2	0.3						1	0	9	2	0	2												9	9	153	48.9	81.3			135	77	129	74	133	77
33041338	1	1	1	4	0		2	0.2			7			1	1	0	1	0	4					1	0					2	0	0	173.3	72.4	90.4	26.6	12	120	76	115	72	123	70
33041339	1	2	1	1	0		3	0.4	3	6	7	3	3	1	0	8	1	0	5	2	30	1	0	2	30	0	30	0	30		0	0	170.5	62.1	80.8	16.2	6	121	79	124	79	117	79
33041340	1	3	1	1	0	1	2	0.4		7	7		2	1	1	0	1	0	4			0	30	0	30			1	30		0	0	167.5	70.1	83	19.1	9	118	70	115	69	124	61
33041341	1	3	1	1	0	1	6	0.4			7			1	0	9	1	0	2					0	50						1	0	180	89.3	91.5	25.9	15	130	83	129	80	127	80
33041342	1	2	1	1	0	1	4	1.3	4	7	7			1	0	4	1	0	2	9	0	2	0	0	30						0	0	169.3	72.1	90.3	23.8	11	130	88	127	84	125	82
33041343	1	3	1	1	0		2	0.8		6	1			1	0	6	1	0	3			7	0	0	30					0	0	0	158.7	52.3	70.5	9	5	119	63	114	60	116	60
33041344	1	2	1	4	0	0	2	1	1	7	7			1	0	4	1	0	3	6	0	0	40	2	0						0	0	164.8	67.9	88.9	28	13	120	72	124	74	128	75
33041345	1	2	1	1	1	1	3	1.4		2				1	0	5	1	0	3			0	20								0	1	171.6	66.2	89.6	25.4	9	156	79	158	78	156	82
33041346	1	3	1	1	1		4	1		7	7		5	1	0	5	1	0	5			1	0	2	0			2	0		1	0	160.3	74.4	98.8			146	96	148	91	139	89
33041347	1	4	1	1	0	1	4	0.4		7	7			1	1	2	1	0	6			0	20	0	15						0	0	174.6	60.3	74.8	16	4	122	64	124	61	116	61
33041348	1	3	1	1	1		5	0.4		2	2			1	1	0	1	0	3			0	40	0	30						1	0	169.8	60.6	75.7	16	5	99	62	103	57	104	59
33041349	1	5	0	1	0		3	1			2			1	1	0	1	0	2					0	30						0	0	187.8	81	92.5	18.5	6	138	87	132	84	130	80
33041350	1	3	1	1	1	1	4	1.4		7	7		7	1	1	2	1	1	0			8	0	0	30			1	0		0	0	177	79.1	95.4	23	11	149	92	144	99	151	94
33041351	1	5	1	1	0	0	4	0.8			7			1	1	0	2	3	0					1	0						1	1	176	80.3	73.5	25.3	10	132	80	127	79	134	76
33041352	1	2	1	4	1	1	2	0.8	2		7		4	1	0	6	2	1	3	3	0			1	30			0	30		0	1	164.6	55.5	72.3	22	7	137	64	140	62	131	64
33041353	1	2	1	1	1		2	0.8		1	7			1	0	8	2	0	5			1	0	0	20						0	0	163.7	79.1	93.4	28.3	15	118	74	123	70	119	68
33041354	1	3	1	2	2		2	0.8		3	4		7	1	0	8	2	1	0			0	30	0	30			1	0	2	1	9	171.7	69.6	94.6	25.6	11	145	70	148	75	140	69
33041355	1	5	0	1	0		5	0.8		7	7			1	0	9	1	0	7			0	20	0	30						0	0	189.8	77.9	76.7	13.8	4	119	68	121	62	121	65
33041356	1	2	1	2	0	1	2	0.4		3				1	0	6	2	0	2			7	0							2	0	1	168.2	79.3	99.5	27.3	16	180	71	172	76	170	76
33041357	1	4	0	1	0		4	0.8		6			3	1	1	5	1	0	2			5	0					3	0		0	0	175.5	54.2	68.7	5	1	104	69	103	70	96	62
33041358	1	4	1	1	1	1	4	0.9	7	3				1	1	0	2	0	2	5	0	1	0								0	0	163.9	55	76.2	15.7	5	104	68	108	69	107	66
33041359	1	3	1	2	1		6	0.6	2		7			1	1	0	1	0	3	4	0			0	30						0	0	162.2	59.5	86	24.4	10	121	79	120	75	122	78
33041360	1	1	1	2	1	1	8	0.9			7			1	0	9	2	2	0					0	20						0	1	163	53.6	75.5	21.8	6	174	100	173	98	174	100
33041361	1	3	1	1	0	1	5	0.8		7	7			1	0	8	2	3	0			0	15	0	20						0	1	170	57.9	74.4	18.8	5	129	76	132	81	126	79
33041362	1	2	1	1	0		5	1.5	3		5			1	0	9	2	0	2	3	0			2	0					1	1	0	161.5	68.9	85.9	25.1	14	142	97	139	92	145	94
33041363	1	2	4	4	2	0	1	0.3		3				1	1	0	2	0	4			0	20							2	0	0	161.4	65.4	92.4	31.3	15	160	90	157	84	152	83
33041364	1	3	1	1	0		4	0.8		7	7			1	0	9	3	3	0			0	20	0	20						1	0	179.5	73.2	91.2	24.4	8	125	88	123	81	130	85
33041365	1	1	1	4	1		2	0.5		3	7			1	0	7	1	0	2			0	20	0	20						0	0	155	59.5	85.6	32.6	14	132	64	130	65	132	67
33041366	1	3	1	1	1	1	3	0.8	7	3	7	3	2	1	1	0	2	2	0	1	0	1	30	2	0	1	0	1	0		0	0	171.4	73.5	86.1	24.9	11	134	79	140	82	132	80
33041367	1	5	0	1	1	0	3	0.4			7			1	1	2	1	0	4					0	10						0	0	169.8	70.5	85	22.5	8	115	67	106	73	109	68
33041368	1	3	1	4	1	1	3	0.7		3	7			1	1	2	2	0	2			0	30	0	20						1	9	177.5	84.6	92.1	25.1	12	130	67	123	72	125	68
33041369	1	2	1	1	1	1	5	1		7	4		4	1	1	0	2	0	2			1	30	1	0			1	0		9	9	166.8	55.3	72.5	14.1	4	103	67	101	65	97	63
33041370	1	2	1	1	0	1	3	1						1	0	7	2	0	5												0	0	162.1	71.8	92.8	27	14	138	80	135	80	130	79
33041371	1	3	3	4	1	1	2	0.8						1	0	6	1	0	3											0	0	0	170.8	66	81.1	19.5	8	140	77	138	77	133	80
33041372	1	3	1	1	1	1	3	0.8		3	7			1	0	8	2	0	5			2	0	1	0						1	1	161.7	62.1	85.6	23.3	9	105	68	100	66	103	68
33041373	1	2	1	1	0	1	3	0.4	3					1	1	0	1	0	4	0	15										0	1	160.3	60.9	84.4	20.7	10	107	68	109	68	107	67
33041374	1	3	1	1	1		5	1				3		1	0	6	3	4	0							1	0				0	0	174.6	68.3	85	23.2	6	120	64	117	62	113	67
33041375	1	3	1	1	1	1	3	0.8		3	7			1	0	8	1	0	5			1	0	1	0						0	0	169.5	74	92	19.8	11	128	82	127	77	128	81
33041376	1	2	1	4	1	0	2	0.6			7			1	0	5	1	0	3					0	30						0	0	164	58.4	82.5	31.4	9	125	74	130	80	126	74
33041377	1	1	1	1	1	1	2	0.8		7				1	0	8	1	0	3			4	0								0	0	157.3	62.6	85.3	21.8	12	118	75	116	75	113	74
33041378	1	1	1	4	0		2	0.2		7	7			1	0	8	2	1	0			0	20	0	20					2	9	9	157.6	57.3	81.3			126	63	130	65	130	65
33041379	1	1	1	1	2	0	2	0.5	3	3	7		7	1	0	8	1	0	5	3	0	1	0	1	30			1	30	2	0	0	163	71.7	92	66	17	168	77	169	77	168	78
33041380	1	3	1	2	0		2	0.4		3	7			1	0	6	2	2	0			1	0	1	30					2	0	0	171.5	72.4	93	24	12	124	90	122	85	128	88
33041381	1	5	1	1	0	1	3	1.2	1	3	7			1	0	8	1	0	4	0	30	1	0	1	0						0	0	177	51.2	67.2	18	1	105	60	105	61	101	66
33041382	1	1	1	4	1	1	3	0.5						1	0	6	2	0	3												1	0	175.5	85	99.4	52	14	142	97	133	93	136	95
33041383	1	2	1	1	1		5	1	5				4	1	0	6	1	0	4	5	0							1	0		1	0	176.3	58.2	75	16.5	3	100	58	96	61	98	56
33041384	1	1	1	4	0	1	2	0.4	2	7	7			1	1	0	1	0	3	5	0			1	0						0	0	161.7	64.9	89	25.2	13	133	79	131	77	126	76
33041385	1	4	1	1	0	1	3	0.8						1	0	8	1	0	3												1	0	165.2	70.2	92	25.9	12	131	90	131	85	126	82
33041386	1	1	1	4	1		2	0.6			7			1	1	0	2	1	0					0	20						0	0	164	66.9	83.5	61	13	110	66	104	64	109	58
33041387	1	1	1	1	0	1	2	0.8	2	7	7			1	0	8	1	0	4	0	30	1	0	2	0						0	0	153	56.8	80.5	23.7	12	120	74	119	74	114	74
33041388	1	1	1	4	1		3	1			3			1	0	8	1	0	3					0	30						0	1	165	71.3	95.4	25.9	14	120	71	123	69	118	70
33041389	1	3	1	4	1	1	6	0.8		7	7			1	1	2	1	1	0			0	20	0	20						1	0	162	65.2	84.7	21	11	146	84	138	81	137	75
33041390	1	2	1	1	1	1	4	0.4	1					1	0	6	2	0	4	1	0										1	1	168	54.3	78	23.3	4	107	65	108	65	109	63
33041391	1	2	1	4	1		5	0.4	2	1	2			1	1	4	1	0	3	3	0	0	30	0	30						1	0	167.5	81.6	97	26.4	18	110	71	110	65	110	63
33041392	1	5	1	1	0		5	1			2			1	0	3	1	0	2					0	30						1	0	175.5	68.9	82.5	31	6	120	70	117	61	117	63
33041393	1	2	1	1	0	1	5	1.2	2	4	4			1	0	9	1	0	6	2	0	3	0	1	30						0	0	158	63.6	85	26.8	13	113	65	112	67	111	70
33041394	1	3	1	1	0		5	1.5		7				1	0	8	1	0	3			8	0								0	0	162.7	61.6	78	15.4	7	120	70	114	66	112	68
33041395	1	3	1	1	0		2	0.7		7			4	1	1	0	1	0	3			0	30					0	30		0	0	166.4	62.1	81.5	20.3	8	150	89	147	93	142	90
33041396	1	4	1	1	1		6	0.8		7	7			1	1	2	1	1	0			0	20	0	20						0	0	167	74.6	91	25.5	12	121	64	121	62	115	65
33041397	1	4	0	1	1		4	1.6	7	2	7			1	0	8	1	0	4	2	0	0	30	1	0						0	0	177.8	62.8	75	13	3	114	69	111	66	116	68
33041398	1	3	1	4	2		6	0.4	2		1			1	0	8	2	0	6	4	0			0	30					2	1	0	165.2	68.4	90	25.1	12	137	95	134	94	137	89
33041399	1	3	1	1	1		4	0.6		7	7			1	0	9	2	2	0			0	20	0	20						0	0	166.5	47.8	67	13.8	1	99	61	94	59	92	58
33041400	1	3	1	1	0		4	0.3				1		1	1	0	1	0	3							2	0				0	0	176.5	77.2	82	18.7	9	125	56	118	59	118	58
33041401	1	1	1	1	0	1	8	1.4	7		7			1	0	6	1	0	3	3	0			0	10						0	0	161.4	68.9	89	24.3	14	147	80	148	88	141	90
33041402	1	2	1	4	0		4	1.3	6	7	7			1	0	7	1	0	2	6	0	2	0	0	40						0	0	154.6	58.2	82.5	29	13	119	69	115	68	122	69
33041403	1	3	1	1	0	1	2	0.5		3	7		7	1	0	8	1	0	4			1	30	1	0			0	20		0	0	169	74.8	91	30.6	15	141	84	132	84	132	83
33041404	1	2	1	1	1	1	3	1			3			1	0	2	1	0	2					0	30						1	0	161.5	73.1	93	30.6	14	128	80	126	82	129	81
33041405	1	3	1	1	0	1	2	0.6	2		7			1	0	6	1	0	5	0	10			1	0						0	0	174.8	76.8	87	22.4	11	132	87	125	90	123	97
33041406	1	2	1	1	1	1	3	0.6		7	7			1	1	8	2	0	5			0	20	0	20						0	1	167	77	99	29.5	16	183	104	180	99	175	99
33041407	1	3	1	1	1	1	4	0.8				7		1	0	6	1	0	3							1	0				1	0	162	78.2	97	35.1	11	127	86	127	77	121	79
33041408	1	3	1	1	1		3	1			3		3	1	0	7	2	0	5					0	30			0	30		0	0	171.1	61.5	77	17.6	6	118	66	117	63	112	63
33041409	1	2	1	4	0		4	0.8						1	0	6	1	0	1											1	0	0	169.5	60.1	76	18.3	6	122	68	122	77	120	75
33041410	1	3	1	1	0	1	4	0.8		7	7			1	1	2	2	1	5			0	20	0	20						1	1	173.2	79.3	95	24.7	12	158	103	149	94	158	103
33041411	1	3	1	4	0		2	0.6						1	1	1	1	0	3												0	0	157	56	75	26.9	10	167	88	179	89	172	88
33041412	1	1	1	4	0		2	0.5		7	7			1	1	0	1	0	5			0	20	1	0					2	9	9	155.2	67.8	90	24.5	17	162	73	158	73	155	73
33041413	1	3	1	1	0	1	3	1		7	7		7	1	1	5	1	0	8			0	55	1	0			1	0		0	0	175.5	87.7	94	27.6	15	141	86	134	87	131	86
33041414	1	1	1	4	2	1	1	0.5	7	7	7			1	0	5	2	1	0	1	0	0	30	0	50						0	0	172.8	53.8	74.8	15.1	3	197	92	196	96	169	83
33041415	1	1	1	4	0		2	0.3		4	7			1	0	5	1	0	3			0	20	0	30						0	0	156.5	57	76			177	79	174	82	165	79
33041416	1	1	1	1	0		2	0.4		2	7		7	1	0	8	1	2	5			1	0	2	0			2	30	2	0	0	161.5	61.8	78	29	13	154	74	145	74	144	70
33041417	1	2	1	4	1	1	3	0.8			7			1	0	8	1	1	2					0	30						0	0						133	74	146	79	156	80
33041418	1	1	1	4	0	1	2	0.6						1	0	9	2	0	3											2	0	0	162	56.3	73	24.2	8	179	74	171	69	164	74
33041419	1	2	1	4	1	1	2	0.6						1	0	6	2	0	3												0	0						148	77	144	72	140	71
33041420	1	1	1	4	1	1	3	0.8	7	7	7			1	0	4	1	0	2	7	0	3	0	2	0						1	1	158.8	61.1	75.2	23.5	11	135	88	137	89	134	89
33041421	1	1	1	4	0	0	2	0.5		7	7			1	0	4	1	0	4			0	30	0	30					0	0	1	161	67.9	81	24	15	139	80	136	87	134	89
33041422	1	1	1	4	0	1	2	0.5		7	7			1	0	5	2	0	3			0	50	0	40					1	0	0	164.4	48.9	69	28.7	4	200	97	177	102	194	94
33041423	1	2	1	4	1	0	2	0.4		6	4			1	1	0	2	0	8			0	40	0	30						0	0	169.3	73.5	83.2	22.4	14	131	61	133	60	126	55
33041424	1	3	1	4	0	1	3	0.7	7	7	7			1	0	5	2	0	5	5	0	6	0	6	0						1	0	178	70.2	77.2	20.3	7	145	76	127	83	134	93
33041425	1	1	1	4	0	1	2	0.4	2	7	7			1	0	8	1	1	2	3	30	1	0	3	0					2	0	0	165.1	58.7	74	19.2	7	153	82	147	74	142	81
33041426	1	2	0	1	2	0	3	1.6		3				1	1	1	1	0	5			6	0								0	0	168.5	71.7	85	29.8	10	139	88	145	94	133	92
33041427	1	1	1	4	0		3	1.6	7	7	7			1	1	3	1	0	3	7	0	5	0	2	0						0	0	160.5	55.3	72	22.2	8	153	70	153	76	145	79
33041428	1	4	0	3	0		2	0.8	1	1	7	1	1	1	0	8	1	0	2	0	20	0	5	0	20	0	30	0	45		0	0	172	76.9	86	20.2		120	66	114	61	117	62
33041429	1	4	0	3	0		4	2		7	7	1	3	1	0	5	1	0	3			0	30	2	0	1	0	0	40		0	0	159	45.3	64.5	10.9		117	76	124	70	123	69
33041430	1	4	0	3	0		4	2	3	2	7	4	7	1	0	5	1	0	5	0	30	0	30	0	30	0	30	0	30		1	0	172	57	78	9.2		108	77	106	61	110	75
33041431	1	4	0	3	0		3	1.5		6		6		1	8	0	1	0	5			0	10			0	10				0	0	169	53.8	67	13.4		128	71	123	74	130	75
33041432	1	4	0	3	0		3	0.4		2	2		3	1	1	0	1	0	5			0	20	0	20			0	20		0	0	166.3	69.1	83	26.1	8	127	70	130	63	130	70
33041433	1	4	0	3	0	0	3	1			1		3	1	1	0	1	0	3					1	0			0	30		0	0	168	47.6	63.5	13.2		118	72	109	65	107	62
33041434	1	4	0	3	0		4	0.8		1	3	5	2	1	0	5	2	2	0			1	0	0	30	0	40	0	40		0	0	174	53.7	67	9.7		99	82	122	65	103	60
33041435	1	4	0	3	0		3	0.8			7			1	0	6	2	0	3					1	0						0	0	179	59.8	72	6.8		106	57	112	59	105	57
33041436	1	4	0	3	0	0	3	1			1	2		1	1	0	1	0	3					0	30	0	30				0	0	178	67.1	70	10.2		129	65	131	68	125	66
33041437	1	4	0	3	0		2	0.5		1	1	5		1	0	6	1	0	3			0	59	0	30	0	10				0	0	166.5	49.3	64	9.7		110	61	111	49	105	48
33041438	1	4	0	3	0		3	0.8			2	2	2	1	0	5	1	0	3					0	20	0	40	0	30		1	0	168	48.3	61	5.7		102	52	91	47	97	80
33041439	1	4	0	3	0		3	1				4	4	1	0	6	2	0	6							0	40	0	40		0	0	172.5	49.9	63	10.3		113	67	111	67	105	57
33041440	1	4	0	3	0		2	0.5		3	2	5		1	0	6	1	0	2			0	10	0	10	0	10				0	0	166	51.2	65	13.1		113	67	126	63	110	62
33041441	1	4	0	3	0		3	0.8			5	6		1	0	6	1	0	3					0	30	0	30				0	0	164.5	57.7	74.5	16.6		131	103	113	64	108	69
33041442	1	4	0	3	0		3	1		1	2	5	5	1	0	6	1	0	2			0	10	0	10	0	20	0	10		0	0	161	57.8	77	17		117	61	116	56	110	59
33041443	1	4	0	3	0		5	0.8		1		7	2	1	0	5	1	0	3			0	10			0	20	1	0		0	0	166.3	65.9	80	15.9		121	73	117	67	117	64
33041444	1	4	0	3	0	0	3	2	7	7	7	7	7	1	0	6	1	0	4	2	0	0	40	1	0	2	0	2	0		0	0	169	60.6	68	15.2		118	66	120	53	120	48
33041445	1	4	0	3	0		4	2.5		2	7			1	0	7	1	0	3			0	30	1	0						0	0	168	88.7	100	25.4		133	70	124	65	130	67
33041446	1	4	0	3	0		3	1		1	1	5		1	1	0	2	1	5			0	20	0	30	0	10				0	0	168	53.5	67	7.3		116	76	116	64	105	59
33041447	1	4	0	3	0		3	0.8		1	7	7	3	1	0	6	1	0	4			0	50	2	0	0	30	0	20		0	0	172	56.5	69	9.7		110	68	109	65	108	62
33041448	1	4	0	3	0		4	0.8		3	7	3	2	1	0	7	1	0	4			0	30	2	0	0	15	0	40		0	0	179	63.8	75	15.6		115	60	99	56	110	63
33041449	1	4	0	3	0		3	0.6	2	2		2	2	1	0	5	1	0	6	0	45	0	45			0	45	0	45		0	0	172	60	72	12.7		121	66	136	66	123	47
33041450	1	4	0	3	0		3	1		3	2	5		1	1	0	1	0	3			0	20	1	0	0	15				0	0	173	56.9	69	9.6		132	76	148	83	142	78
33041451	1	4	0	3	0		4	0.6		2	2		2	1	1	2	1	0	4			0	15	0	20			0	15		1	0	181	79.3	83	17.3		148	76	143	72	139	70
33041452	1	4	0	3	0		3	0.8		3	7	3	3	1	0	8	1	0	5			0	20	0	30	0	20	0	15		0	0	175	78.2	88	21		127	62	118	57	118	53
33041453	1	4	0	3	0		4	2		7	7			1	0	5	1	0	3			0	20	0	30						0	0	160	53.9	69	10.6		118	58	108	55	109	54
33041454	1	4	0	3	0		4	0.8		2	2	5	2	1	0	5	2	3	0			1	0	0	30	1	0	0	30		1	0	166	68.5	78	18.6		113	63	110	66	105	57
33041455	1	4	0	3	0		3	1						1	0	8	1	0	3												0	0	169	65.2	83	18.8		125	65	124	74	123	61
33041456	1	4	0	3	0		3	1		2				1	0	9	1	0	3			1	0								0	0	178	78.3	88	17.6		126	66	125	60	124	61
33041457	1	4	0	3	0		3	0.8			1			1	0	8	1	0	3					0	30						0	0	165	52.5	68	13.9		119	68	120	68	115	65
33041458	1	4	0	3	0		3	0.8			7	3		1	0	6	1	0	2					0	30	0	10				0	0	170	55.6	67	12.5		129	67	130	59	140	74
33041459	1	4	0	3	0		6	1.2			1			1	1	0	1	0	2					0	30						0	0	175	73.2	80	18.4		125	57	117	62	112	57
33041460	1	4	0	3	0		3	0.8			1	7	5	1	1	0	1	0	5					0	10	0	30	0	30		0	0	170	62	75	17		110	70	111	69	111	58
33041461	1	4	0	3	0		4	1.5		3	2	5		1	0	6	1	0	2			0	30	0	30	0	10				0	0	164	49.7	64	13.2		131	82	123	74	122	76
33041462	1	4	0	3	0	0	4	1			1			1	0	9	1	0	3					0	30						0	0	173	62.8	76	15.1		153	65	151	65	145	54
33041463	1	4	0	3	0		3	0.4		2	2		2	1	1	5	2	1	5			0	20	0	10			0	20		9	9	167	54.8	71	11.7		118	56	105	60	100	52
33041464	1	4	0	3	0		3	0.8			7	3		1	0	4	1	0	8					2	0	0	20				0	0	161	62.5	77.4	17.4	7	127	92	120	74	123	71
33041465	1	4	0	3	0	0	3	0.8		3	7	4		1	0	7	1	0	4			0	15	0	45	0	10				1	0	171	57	66.1	14.5	3	116	80	118	79	123	73
33041466	1	4	0	3	0	0	3	0.4		2	2		3	1	1	2	2	1	2			0	20	0	10			0	20		0	0	156.1	56.6	71.6	14.7	6	102	63	124	56	118	55
33041467	1	4	0	3	0		3	0.8	3	3		3	3	1	0	4	1	0	5	0	45	0	45			0	45	0	45		0	0	170.2	51.9	66.7	12.9	2	148	80	134	76	125	63
33041468	1	4	0	3	1		3	0.8		1	7	4		1	0	8	2	0	6			0	10	0	10	0	15				0	0	168.7	27.5	89.1	26	10	128	55	122	62	124	60
33041469	1	4	0	3	0		3	0.7		2	4	1	1	1	0	6	1	0	2			0	20	0	20	0	20	0	20		0	0	175.4	64.6	78	19.2		143	75	130	66	134	86
33041470	1	4	0	3	0		4	1		1	7			1	0	5	2	0	2			0	30	0	30						0	0	175.6	84.4	88	22.4		122	75	122	71	119	75
33041471	1	4	0	3	0		3	0.6		3	2		2	1	1	2	2	1	2			0	20	0	10			0	20		0	0	164.4	49.3	68.9	17.2	2	128	72	119	66	115	66
33041472	1	4	0	3	0	1	1	1	5	1	1	3	3	1	0	5	1	0	4	0	20	0	10	0	20	0	45	0	20		0	0	162	48.7	65.4	6.9	2	108	66	105	69	106	66
33041473	1	4	0	3	0		3	0.8	7		5			1		8	1		3	0	10			0	30						0	0	169.9	59.8	75.8	14.8	4	112	55	113	57	111	49
33041474	1	4	0	3	0	0	4	1		7	7	3	3	1	0	7	1	0	5			0	20	0	30	0	40	0	30		0	0	174	61.3	75.6	15.9	4	135	68	117	66	106	58
33041475	1	4	0	3	0		5	0.6		2	2		2	1	1	2	1	1	0			0	20	0	20			0	20		0	0	168.2	66.8	79.8	16.8	7	140	73	132	76	125	67
33041476	1	4	0	3	0	0	2	0.7	3	3		3	3	1	0	6	1	0	5	0	45	0	45			0	45	0	45		0	0	169	61.4	70.5	16.7	5	137	78	127	78	119	72
33041477	1	4	0	3	0		4	0.5		3			3	1	1	4	2	2	0			0	15					0	10		0	0	173.4	60.7	80	21.4	4	134	64	130	65	113	55
33041478	1	4	0	3	0	0	3	1			1	3		1	0	8	1	0	2					0	15	0	45				0	0	170.2	54.6	68.7	8.4	2	129	68	114	58	106	56
33041479	1	4	0	3	0		4	0.7		7	7			1	0	6	1	0	4			0	30	1	0						1	0	167	56	68.4	7.2	3	97	55	97	55	94	50
33041480	1	4	0	3	0	0	3	0.5	3	3		3	3	1	0	4	1	0	5	0	45	0	45			0	45	0	45		0	0	162	52.6	74.2	18.5	4	114	64	112	56	109	49
33041481	1	4	0	3	0		3	1		7	7	4	5	1	0	6	1	0	1			0	20			0	30	0	20		0	0	171.8	84.1	93.4	23.7	11	112	72	114	63	112	58
33041482	1	4	0	3	0		3	1		3	2	3		1	0	7	1	0	1			0	30	0	30	0	45				0	0	170.5	59	73.4	14.1	4	144	68	120	69	118	77
33041483	1	4	0	3	0		3	0.8			1	5	5	1	0	4	2	2	0					0	30	0	10	0	20		1	0	166	51.8	68.8	8.6	2	108	60	103	63	109	59
33041484	1	4	0	3	0	0	3	0.5		7	7	7		1	0	8	1	0	5			0	10	0	30	0	15				0	0	161	57.3	74.8	58.1		101	63	114	56	110	69
33041485	1	4	0	3	0	0	3	0.7		2	7	3		1	0	5	2	0	4			0	15	0	30	0	10				0	0	174.9	48.3	65.6	9.4		132	69	109	76	118	78
33041486	1	4	0	3	0		3	0.4		2			2	1	1	2	1	0	5			0	20					0	10		0	0	180.2	61.8	73.4	10.8	2	116	57	108	53	110	55
33041487	1	4	0	3	0		4	0.7	2	2	1	2	2	1	0	6	1	0	4	0	45	0	45	0	30	0	45	0	45		0	0	165.1	63.6	73.1	14		111	52	110	58	117	46
33041488	1	4	0	3	0		4	0.8		3	1	5	3	1	0	4	1	0	4			0	30	0	10	0	30	0	30		0	0	174.5	68.2	81.6	21.9	5	115	66	124	59	123	60
33041489	1	4	0	3	0		4	0.4		2	2		3	1	1	2	1	0	5			0	10	0	10			0	15		0	0	170	51.7	69.8	14.8	2	106	65	104	55	96	53
33041490	1	4	0	3	0	0	2	0.5			1	1		1	0	4	1	0	3					0	40	0	15				0	0	166	55.5	69	9.7	4	127	73	114	72	111	61
33041491	1	4	0	3	0		3	0.7	2	2		2	2	1	1	2	1	0	6	0	45	0	45			0	45	0	45		0	0	173.7	78	85.8	22.6	9	115	61	116	67	115	65
33041492	1	4	0	3	0		3	1.2		4	7	2	1	1	0	7	1	0	6			0	30	0	30	0	20	0	30		0	0	168	52.7	71	16.9	2	116	67	108	53	100	55
33041493	1	4	0	3	0		5	0.8		2			4	1	1	2	1	0	8			0	20					0	10		0	0	161.9	52.1	69.4	12.3	3	99	53	100	48	92	56
33041494	1	4	0	3	0	0	3	0.1			1	1	3	1	0	8	1	0	2					0	30	0	45	0	20		0	1	163.1	56.6	72.4	17.6	5	118	75	108	74	109	68
33041495	1	4	0	3	0	0	4	0.8	1	1		1	1	1	0	4	1	0	5	0	45	0	45			0	45	0	45		0	0	170.4	56.1	72	8.2	3	105	48	101	44	100	41
33041496	1	4	0	3	1		5	0.8			7			1	0	6	1	0	1					0	30						0	0	167.1	48.5	62.3	7.7	1	104	72	98	69	107	64
33041497	1	4	0	3	0	0	3	0.8		1	7	1		1	0	4	1	0	5			0	10	0	30	2	0				0	0	169	56.6	71.3	7.8	3	125	74	121	65	116	59
33041498	1	4	0	3	0		3	0.8		6	2	2	2	1	0	5	2	2	0			0	20	1	0	1	0	0	40		1	0	176.1	60.8	72	11.6	3	123	84	122	76	112	74
33041499	1	4	0	3	0		3	0.5		3	2		2	1	1	2	1	0	8			0	15	0	20			0	20		0	0	161.1	55.6	71.3	9.9		115	54	115	53	110	54
33041500	1	4	0	3	0		3	0.8		4	2	5	3	1	0	5	2	2	0			0	20	0	30	3	0	0	20		0	0	169.3	53	67.6	9.4	2	134	68	136	62	133	58
33041501	1	4	0	3	2	0	3	0.6	2	2		2	2	1	0	5	1	0	5	0	45	0	45			0	45	0	45		0	0	179.2	71.1	81.3	16.1		99	74	110	64	103	72
33041502	1	4	0	3	0		3	0.8		7	7			1	0	6	2	0	4			0	30	0	20						0	0	171.6	64.7	72	8.5	5	113	56	104	55	108	58
33041503	1	4	0	3	0		3	0.8		2	1	3	2	1	0	5	2	0	4			0	30	0	10	0	20	0	10		0	0	174.1	60.2	66	9.7	3	123	53	125	68	122	63
33041504	1	4	0	3	0	0	4	1		3	2	1	7	1	0	8	1	0	2			0	20	1	0	1	0	0	15		0	0	181	63.9	69.3	11.7	3	113	62	105	60	107	60
33041505	1	4	0	3	0		5	1			7			1	0	6	1	0	3					1	0						0	0	162.8	53.7	69	8.3	4	98	59	109	60	87	61
33041506	1	4	1	3	0	0	3	1			2			1	0	8	2	0	4					0	45						0	0	176.2	76.7	83.7	21.6	8	131	72	131	75	128	60
33041507	1	4	0	3	0		6	1.5			2	2		1	0	8	1	0	2					1	0	0	25				0	0	166.3	46.2	61.5			119	65	102	57	99	60
33041508	1	4	0	3	0		2	0.8		2		1	2	1	0	7	2	0	5			0	15			0	30	0	15		0	0	162	51.7	70.5	12.5	3	111	73	113	69	108	65
33041509	1	4	0	3	0		4	0.8		5	3	3	3	1	0	8	2	3	0			0	30	0	30	0	45	0	20		0	0	168.2	52.4	67.8	12.9	2	114	60	115	50	117	56
33041510	1	4	0	3	0		4	1.1		2	7	2	2	1	0	7	1	0	4			0	15	0	25	0	30	0	15		1	0	169	63.2	76.8	18.2	5	111	68	116	66	113	66
33041511	1	4	0	3	0		3	0.5		2	2		2	1	1	2	2	0	8			0	20	0	15			0	15		0	0	170	50.9	61.3	8		130	76	124	73	119	70
33041512	1	4	0	3	0		3	0.6	2	2	1	2	2	1	0	7	1	0	4	0	45	0	45	0	35	0	45	0	45		0	0	171	56.5	66.1	8.8		105	71	106	60	110	70
33041513	1	4	0	3	0		4	0.8			7			1	0	8	1	0	2					1	0						0	0	168	51.6	65.8	6.8		97	58	99	58	94	55
33041514	1	4	0	3	0		4	0.8	2	2		2	2	1	0	8	1	0	5	0	45	0	45			0	45	0	45		1	0	171.4	50.2	65.3	7.8		121	69	110	67	108	66
33041515	1	4	0	3	0		4	0.4		3			3	1	1	2	1	0	8			0	20					0	20		0	0	177.8	65	74.2	13.1		96	56	92	60	105	58
33041516	1	4	0	3	0		3	0.4		2	2		2	1	1	2	2	0	8			0	20	0	20			0	20		0	0	172.6	62.2	75.4	15.4		120	58	114	54	107	57
33041517	1	4	0	3	0		4	0.8	2	2	1	2	2	1	0	9	1	0	5	0	45	0	45	0	45	0	45	0	45		1	0	176.6	70.8	83.1	21.3	6	115	67	113	65	106	58
33041518	1	4	0	3	0	0	5	1.5		1	7	4		1	0	8	1	0	5			0	30	0	30	0	15				0	0	175.2	54.9	64.2	10.6		134	84	120	75	108	66
33041519	1	4	1	3	0		3	0.5		3	2		3	1	1	2	2	1	2			0	30	0	20			0	20		0	0	175.2	51.7	63	10.1		115	75	111	70	110	68
33041520	1	4	0	3	0		3	0.7	2	2		2	2	1	0	8	1	0	5	0	45	0	45			0	45	0	45		0	0	173.9	58	71	9.8		123	69	122	70	120	77
33041521	1	4	0	3	0		4	0.7	2	2		2	2	1	0	9	1	0	5	0	45	0	45			0	45	0	45		1	0	173.8	56.2	73	10.9		129	94	132	85	133	78
33041522	1	4	0	3	0		4	0.8	2	2	2	2	2	1	0	9	1	0	5	0	45	0	45	0	45	0	45	0	45		0	0	169.1	65.1	83	19.9		136	68	114	67	115	67
33041523	1	4	0	3	0		5	2.5		7	7	7	7	1	0	8	1	1	0			0	30	0	30	1	0	0	30		0	0	174	75.5	80	16.8		140	66	135	62	129	54
33041524	1	4	0	3	0		4	0.4		2	2		2	1	1	2	2	0	7			0	20	0	20			0	20		0	0	171.1	65.9	81.1	15.8		112	47	108	46	101	47
33041525	1	4	0	3	0	0	5	1.2		3	7	3	5	1	0	5	1	0	4			0	10	0	30	0	10	0	20		0	0	172.2	68.4	83.8	17.6		110	59	111	53	118	50
33041526	1	4	0	3	0	0	3	0.7		3	7	5		1	0	8	1	0	4			0	10	2	0	0	10				0	0	157.2	53	70	18.3		112	60	116	60	109	49
33041527	1	4	0	3	0		3	0.8		7	1	2	3	1	0	4	2	3	0			0	20	2	0	0	30	0	10		0	0	172.8	60.6	72	12.3		131	71	127	60	129	63
33041528	1	4	0	3	0		3	0.5		3	2		3	1	1	2	2	2	0			0	20	0	20			0	20		0	0	161.5	43.3	58.9	5.8		103	66	96	61	90	59
33041529	1	4	0	3	0		6	1.2			7	5		1	0	8	2	0	4					1	30	2	0				0	0	173.7	84.5	89.7	23.9		133	65	120	67	125	58
33041530	1	4	0	3	0		4	1.2		3		7	7	1	0	6	1	0	2			0	15			0	30	0	15		0	0	171	53.1	68.8	14.4		118	79	121	75	117	71
33041531	1	4	0	3	0		4	1.2		7	7	5	5	1	0	6	1	1	0			0	59	1	10	0	30	0	30		0	0	169.7	49.3	68.2	8.9		119	76	125	72	113	72
33041532	1	4	0	3	0		3	1.2		3	7	7	7	1	0	8	1	0	2			0	15	0	30	1	5	0	45		0	0	173.4	83.3	83.8	20.2		140	75	134	68	137	66
33041533	1	4	0	3	0		3	1.2		3	7	3	3	1	0	6	1	1	0			0	20	0	30	1	0	1	0		0	0	163.5	50	66	5		106	63	102	56	102	54
33041534	1	4	0	3	0		4	0.8		2	1	5	5	1	0	5	2	2	0			0	20	1	0	0	20	0	20		0	0	182.2	58.8	70.3	12		119	70	118	71	117	65
33041535	1	4	0	3	0		3	0.4		3	3		3	1	1	2	2	2	0			0	30	0	15			0	30		0	0	169.1	44.8	62	17.3		119	70	110	67	104	62
33041536	1	4	0	3	0		3	0.6		2	7	3		1	0	6	1	0	5			0	30	2	0	0	20				0	0	174.2	52.3	63.7	8		102	66	101	65	102	60
33041537	1	4	0	3	0		3	0.7	2	2	1	2	2	1	1	5	1	0	6	0	45	0	45	0	30	0	45	0	45		0	0	184.5	71.6	85.1	14.7		110	60	112	57	106	54
33041538	1	4	0	3	0		4	0.8		2	7	3		1	1	0	1	0	1			0	30	0	15	0	10				1	0	175	77.2	87	20.7		125	72	122	58	123	49
33041539	1	4	0	3	0		3	0.5		2			2	1	1	3	2	2	5			0	20					0	20		0	0	167.9	52.1	67	8.4		118	65	117	66	114	57
33041540	1	4	0	3	0		2	0.4		2	2		2	1	1	4	2	2	0			0	30	0	15			0	20		0	0	175.3	50.8	66.5	8.8		114	76	107	71	107	61
33041541	1	4	0	3	0		3	0.8			7			1	0	6	1	0	3					0	30						0	0	172.3	68.1	80.2	14.2		132	77	128	76	117	77
33041542	1	4	0	3	0	0	4	0.9		1	7	2	2	1	0	8	1	0	5			0	15	0	30	0	10	1	0		0	0	179.1	64	76.9	12.2		111	53	109	55	103	54
33041543	1	4	0	3	0		4	0.8	2	2	1	2	2	1	0	8	1	0	6	0	45	0	45	0	40	0	45	0	45		1	0	163.4	65.4	76.4	13.4		125	53	112	54	111	55
33041544	1	4	0	3	0	0	5	1.2		3	7	6	3	1	0	8	1	0	5			0	15	0	30	0	30	0	30		0	0	184.1	56.4	66.6			100	54	96	56	98	43
33041545	1	4	0	3	0		3	1.5		4	7	7	7	1	0	8	1	0	2			0	20	0	30	0	30	0	20		0	0	179	58.8	67.2	8		117	63	114	64	106	60
33041546	1	4	0	3	0		5	0.7	2	2		2	2	1	0	9	1	0	5	0	45	0	45			0	45	0	45		0	0	171.5	53.5	68	7.4		118	50	108	58	114	48
33041547	1	4	0	3	0		3	0.8		2	7	3		1	0	6	1	0	5			0	10	0	45	0	15				0	0	163.6	46	62	6.4		104	60	91	58	91	60
33041548	1	4	0	3	0	0	3	0.8		2	7	5		1	0	6	2	0	4			0	10	0	40	0	10				0	0	168.5	59.7	66	11.9		122	71	117	68	124	67
33041549	1	4	0	3	0		4	0.8			7			1	0	6	1	0	2					0	30						0	0	166.2	76.2	86.7	20.8		110	87	111	48	104	48
33041550	1	4	0	3	0		3	0.8					5	1	0	5	2	3	0									0	10		0	0	172.8	84	94	22.4		129	79	134	85	141	69
33041551	1	4	0	3	0		4	0.8		1	2	5	5	2	0	8	2	3	0			0	20	0	30	1	0	0	20		0	0	175	67.3	75.9	12.7		94	69	102	49	101	49
33041552	1	4	0	3	0		4	2		3	7		6	1	0	6	1	1	0			0	20	0	30			0	30		0	0	160.1	49.1	66.7	11.7		99	67	101	50	100	54
33041553	1	4	0	3	0		4	0.8			2	5	5	1	0	5	2	3	0					0	30	0	45	0	10		1	0	169.3	50.3	64.4	6.8		120	77	114	65	110	56
33041554	1	4	0	3	0		3	0.8		1		2	5	1	0	5	2	1	0			0	20			0	45	0	10		0	0	167.1	69.3	83.6	19.6		110	62	102	59	100	54
33041555	1	4	0	3	0		4	2		7	7	7	5	1	0	8	1	0	3			0	15	0	30	0	30	0	20		0	0	169.2	58.3	70	11.5		109	58	102	53	106	48
33041556	1	4	0	3	0		4	1.5		7	7	3	3	1	0	8	1	0	3			0	20	0	30	0	30	0	30		0	0	179.9	54.6	70	9.9		113	57	103	55	108	55
33041557	1	4	0	3	0		5	2.5		7	7	7	4	1	0	8	1	0	2			0	15	0	20	0	30	0	20		0	0	173.1	59.7	71	13.6		125	66	131	59	120	63
33041558	1	4	0	3	0		3	0.8		2			5	1	0	4	2	2	0			0	15					0	10		0	0	171.6	57.7	70	11.1		121	79	119	72	120	75
33041559	1	4	0	3	0		3	0.8			7			1	0	6	1	0	2					0	35						1	1	165.5	60.1	74.3	16.9		136	71	129	60	135	62
33041560	1	4	1	1	0	1	2	0.4		2	3		2	1	1	3	2	2	0			0	20	0	20			0	20		1	1	166	72	91.5	27.9	13	120	70	127	75	124	72
33041561	1	1	1	1	1	1	3	0.8		1	7		7	1	1	5	1	1	5			0	30	0	30			0	40		0	1	167.2	66.9	87.3	20.7	9	124	79	118	84	115	78
33041562	1	3	1	1	1	1	6	0.8		3	2		2	1	0	8	1	0	2			2	0	0	40			0	20		1	0	160	65.1	82	19.8	20	123	77	118	77	120	76
33041563	1	5	1	1	0	1	3	0.7		7	7			1	1	5	2	0	5			1	0	0	10						1	0	173.1	80.7	96	24.4	12	134	83	126	81	123	76
33041564	1	1	1	2	1		2	0.5		3	2		2	1	1	3	1	0	7			0	20	0	20			0	20	2	0	0	162	67.7	91	27.8	15	115	61	118	61	116	63
33041565	1	5	1	1	1		6	0.8		2	2			1	0	9	1	0	2			0	20	0	30						1	0	178	66	80.7	17.2	5	112	70	110	75	113	69
33041566	1	1	1	4	1	1	2	0.5	3	2	7	7		1	1	5	2	0	6	2	0	0	30	2	0	2	0				0	0	172.5	76	82.5	21.8	11	133	82	123	78	121	81
33041567	1	1	0	4	0		1	0.5		4	7			1	1	2	1	0	2			0	40	1	30						0	0	158.5	52.1	66			113	60	115	57	120	62
33041568	1	2	1	1	1	0	5	1.2	2	2		2		1	0	9	1	0	5	3	30	3	30			3	30			0	0	0	162	61.7	68	22.9	10	118	77	123	73	115	71
33041569	1	4	1	1	0	1	4	1			7			1	1	0	1	0	5					0	30					0	0	0	172.8	66.7	82.7	22.6	6	134	97	142	107	144	95
33041570	1	3	1	1	1	1	4	0.8	2					1	0	8	1	0	3	0	15										0	0	177.1	72.1	86.2	22.6	8	128	87	129	82	126	82
33041571	1	3	1	1	1		3	0.5		2			2	1	1	2	2	2	0			0	20					0	20		1	0	169	57.6	68.2	9.5	4	113	74	107	65	108	69
33041572	1	4	1	1	0		6	2	7	1	7			1	0	9	1	0	5	4	30	0	30	0	30						1	0	168.5	67.6	82	18.5	8	130	74	131	84	119	80
33041573	1	1	1	2	0	1	5	0.5		2	3		5	1	0	8	2	0	2			0	40	0	40			1	0	2	9	9	167.8	77.2	97	31.5	18	172	66	162	71	162	62
33041574	1	1	1	2	0		2	0.5		2	2		2	1	1	4	2	2	0			0	20	0	10			0	20	2	9	9	163.5	69.9	87.5	33	17	194	87	183	94	183	90
33041575	1	2	1	1	0		7	0.7		2	2		3	1	1	5	2	2	0			0	20	0	15			0	20		9	9	151.5	41.8	71	33.3	4	110	69	107	68	114	64
33041576	1	1	1	4	0	1	2	0.7	2		5			1	0	6	1	0	3	5	0			2	0					1	9	9	166.1	52.2	71.2	21.1	4	121	63	118	65	130	66
33041577	1	1	1	4	0	0	2	0.8		2	7			1	0	8	1	0	5			0	30	0	30					2	0	0	172	60.5	79.5	19.8	6	146	61	150	67	149	68
33041578	1	3	1	1	0	0	2	0.6		4				1	1	0	1	0	5			0	45							0	1	1	175.1	67.2	81	22.4	7	175	117	189	108	194	106
33041579	1	1	4	2	0	1	1	0.4		2	2		2	1	1	2	2	2	0			0	20	0	15			0	20	2	9	9	161.5	56.4	81			159	77	117	73	154	71
33041580	1	2	1	4	0		2	1			4			1	0	6	1	0	3					1	0					2	9	9	154.9	49.5	72	26.2	8	120	67	124	58	127	58
33041581	1	1	1	2	0		2	0.4		2	2		3	1	1	2	2	1	5			0	20	0	10			0	10	2	9	9	165	60.7	79			185	112	182	93	176	102
33041582	1	5	1	1	1	1	4	0.8		7	7			1	1	2	1	0	4			0	20	1	0						0	0	173.1	69.7	82.5	19.2	8	141	89	137	87	134	87
33041583	1	1	1	2	0	1	2	0.8						1	0	6	1	0	3											2	0	0	171	63.2	81.2	29.9	9	118	66	126	70	115	68
33041584	1	3	1	1	0		5	0.8		2			2	1	1	5	2	2	0			0	20					0	15	2	0	1	159.4	69	88	25.5	15	150	99	148	98	136	90
33041585	1	1	1	2	1		2	0.4		2	2		3	1	1	2	2	2	0			0	20	0	15			0	10		9	9	163.1	49	72.5	26.6	4	146	85	145	75	148	76
33041586	1	1	4	4	0		1	0.5	1	7	7			1	1	2	1	0	5	3	0	1	0	2	0						0	0	153.1	53.2	76	21.5	10	173	76	166	81	168	78
33041587	1	2	1	1	0	1	2	0.6	2	3	7			1	1	0	1	0	5	3	0	0	30	2	0						0	0	159.2	56.6	76.5	22.9	10	142	85	155	82	131	85
33041588	1	2	2	4	0	0	2	0.6			4			1	0	6	2	0	3					1	0						1	1	171.1	73.8	93.5	30	11	122	79	118	83	113	78
33041589	1	1	1	2	0		2	0.4		2			3	1	1	2	2	1	5			0	20					0	20		9	9	165.5	80.6	98.2	26.2	18	190	100	162	108	164	98
33041590	1	5	0	1	1	0	4	0.5		3			3	1	1	2	2	2	0			0	20					0	20		0	1	170	50.1	64	10.7	1	125	75	114	70	126	73
33041591	1	1	1	4	1		2	0.8	4		4			1	2	4	1	0	4	4	0			0	50						9	9	157.3	51.5	72.7	17.5	7	140	80	142	74	140	75
33041592	1	2	1	4	0	1	2	0.7	2	2	7			1	0	9	2	0	4	2	30	0	30	1	0						0	0	161.8	66.3	83.3	29	14	118	72	128	70	109	70
33041593	1	3	1	1	0		4	0.8						1	0	8	1	0	3												1	0	167.6	62.4	78.2	17	7	119	75	113	74	113	76
33041594	1	1	1	4	0		2	0.5		1	3			1	0	8	1	1	0			0	20	0	30					0	0	0	167.9	69.2	93.3	27.2	13	107	59	132	65	137	69
33041595	1	3	1	4	1	1	5	0.8			2			1	0	8	1	0	6					0	10						0	1	174	69.6	78.8	19.9	7	136	70	124	67	123	62
33041596	1	2	1	4	0		2	0.6		4			4	1	0	9	1	0	6			1	20					1	0		1	0	171.8	69.8	90.7	22.4	9	113	69	111	66	111	62
33041597	1	1	1	1	1	1	2	0.5	3	3	7			1	0	5	2	2	0	1	0	8	0	1	0					2	1	1	169	58.2	78.8	19.2	6	152	86	145	86	154	85
33041598	1	2	4	4	0	0	2	0.6						1	1	0	3	0	2												0	0			93			139	78	144	75	143	71
33041599	1	5	1	1	0		8	1.8	7	5	7	7	3	1	0	6	1	0	2	8	0	0	20	0	20	0	30	0	15		1	1	168.2	64	82	22.5	7	141	72	129	74	120	69
33041600	1	2	1	1	1		5	0.8		1	7			1	0	9	1	0	3			0	20	2	30						0	0	165	72.8	87.5	25.7	16	143	85	144	87	141	81
33041601	1	3	1	1	1		2	0.8		7	7			1	0	8	2	5	0			8	0	1	0						0	0	169	71.3	91	25.2	13	165	80	147	88	157	73
33041602	1	3	1	2	0		2	0.8		5				1	0	7	1	0	5			0	20								0	0	148.9	44.2	76.7	37.6	7	181	101	174	95	164	92
33041603	1	2	1	4	0		2	0.6						1	0	7	1	0	4												0	0	165.2	52.5	76.2	27.9	5	165	92	160	88	168	86
33041604	1	2	1	1	0	1	3	0.6		7	1			1	0	6	2	5	0			10	0	1	0						1	0	165.5	55.6	76.8	13.4	5	115	72	113	69	107	66
33041605	1	2	2	4	0		4	0.8			7			1	0	4	1	1	0					2	0						1	1	172.4	86.5	79			134	86	130	81	131	81
33041606	1	3	1	4	1		3	1		3	2			1	1	2	1	0	3			0	15	0	15						0	1	169.5	59.1	79.7	17.3	5	110	63	109	62	109	63
33041607	1	1	1	4	0	0	2	0.7		2	7		3	1	0	8	1	0	3			0	30	0	40			0	50		0	0	170.8	66.8	86.3	28.8	10	135	72	133	72	120	68
33041608	1	3	1	1	2		4	1.4		2	7			1	0	7	1	0	2			0	20	0	20						1	0	173.6	70.5	90.5	24.1	8	113	70	109	75	108	71
33041609	1	1	1	4	1	1	2	0.6		7	7		7	1	0	8	1	0	3			0	20	0	50			1	0		0	0	157.2	51.2	78.5			130	68	125	65	125	70
33041610	1	2	1	1	2	1	2	0.7		7	7	7		1	0	5	1	0	5			0	40	0	30	0	30				1	0	163.1	77.8	94.5	27.2	16	150	84	133	83	138	81
33041611	1	2	1	4	1	1	5	1.6		7	7		7	1	0	7	1	0	2			2	30	2	0			0	30		0	0	169.9	64.3	89	22	8	110	70	117	71	108	68
33041612	1	3	1	4	1	1	8	0.8			4		2	1	0	5	1	1	0					0	30			1	0		1	0	175.6	79.8	89.6	25.3	10	129	103	146	80	152	80
33041613	1	4	1	1	1	1	5	1.8		2	1			1	0	4	2	1	2			0	20	0	20						1	0	172.6	58.6	80.8	19.4	4	124	68	125	69	130	69
33041614	1	2	1	1	1	1	5	1		7	3			1	0	8	2	5	0			5	0	0	30					1	0	1	160.7	74.3	92.2	25.4	16	125	79	124	82	127	80
33041615	1	3	1	1	1		4	0.6		2	3		2	1	1	5	2	2	0			0	15	0	20			0	20		0	1	166.8	73.9	90.8	24.7	13	137	83	129	85	123	83
33041616	1	3	1	1	1		4	0.8		1	7			1	0	8	1	0	5			0	20	2	0						0	0	168.1	66.8	83.4	22	9	121	73	121	71	121	74
33041617	1	3	1	1	0	1	3	0.8	3	3	7		7	1	1	0	1	0	5	1	0	0	30	1	0			2	0		0	1	175	69	81.7	19.3	8	124	74	129	71	125	75
33041618	1	2	1	4	0		3	0.8	2	3	7			1	1	2	1	0	5	2	0	0	30	0	30					0	0	0	162.5	52.1	69.5	22.5	6	143	86	123	82	126	87
33041619	1	5	1	1	0		5	0.5		2	7		7	1	1	2	2	0	2			0	30	0	15			0	15		0	0	175	64.2	79.8	15.5	5	120	69	116	62	109	61
33041620	1	4	1	1	1		3	0.8		7				1	0	6	2	4	0			8	0								0	1	171.8	73.9	90	22.6	10	199	124	204	120	202	122
33041621	1	2	1	4	1	0	5	1	7		7		1	1	1	2	1	0	5	0	20			2	0			0	30		0	1	165.7	65.8	81	19.3	9	101	60	96	60	98	61
33041622	1	3	1	1	1	0	4	0.8			1			1	0	5	1	0	8					0	10						1	0	170.4	52.8	73.8	13.1	2	125	69	125	71	109	68
33041623	1	3	1	1	2	1	3	1		1	5		7	1	0	8	1	0	2			0	20	0	30			0	15		0	0	171.4	79.1	93.6	23.1	12	128	84	136	88	135	87
33041624	1	2	1	1	0		3	0.6		5	5		5	1	1	5	2	2	0			0	20	0	10			0	10		9	1	156	60.1	86.5	29.2	12	156	92	141	90	132	89
33041625	1	4	1	1	0	1	3	0.8		2	7			1	1	2	1	0	4			0	30	2	20						1	0	169.6	78.4	91.1	27.3	12	125	79	128	76	131	73
33041626	1	4	1	1	1		4	0.8		4				1	0	9	1	0	7			1	30								0	1	172.3	62.7	82.7	19.2	5	129	65	93	67	98	66
33041627	1	4	1	1	1		3	1			7		2	1	0	8	1	0	4					2	30			0	30		0	0	175.1	84.4	96	27.9	13	129	64	130	59	123	54
33041628	1	3	1	1	0	1	3	0.8		7	7			1	0	8	1	0	5			2	0	2	30						0	0	170.6	83.3	96.5	30	16	133	93	137	91	128	84
33041629	1	1	1	4	0	0	2	0.8			2			1	0	3	1	0	1					0	30					2	0	0						164	70	157	76	162	71
33041630	1	4	1	1	0	1	3	0.5			6	6		1	0	4	2	0	2					0	50	0	30				1	0	177	94.6	98	28.6	16	131	75	115	75	111	60
33041631	1	3	1	1	0	1	3	0.8		7	7		7	1	1	2	1	0	6			2	0	4	30			4	30		0	1	182	61.5	75	9.1	2	123	79	119	75	118	73
33041632	1	3	1	1	1	1	3	0.5	1		3			1	0	6	2	0	1	0	15			0	15						9	1	166.1	58.2	77	20.8	6	145	96	136	101	153	99
33041633	1	3	1	1	1		6	0.6		3	5		5	1	1	5	2	2	0			0	20	0	20			0	15		1	0	168.1	58.6	75.8	21.3	5	113	65	113	59	110	60
33041634	1	1	1	1	1	1	6	0.8		2	2		5	1	1	2	2	2	0			0	20	0	20			0	10		0	1	165.1	61.5	85.5	19	8	133	79	123	79	125	78
33041635	1	2	1	4	0	1	2	1.2		3	7		7	1	0	9	1	0	5			1	0	2	30			2	0		0	0	164.5	69.6	91.7	29.1	14	139	78	139	78	137	76
33041636	1	4	1	1	1		3	0.6			7			1	0	8	1	0	4					2	0						0	1	169	73.8	86.6	21.5	10	129	67	120	62	120	63
33041637	1	3	1	1	1		6	1.2		7	7			1	0	6	2	1	0			9	0	1	0						0	1	168.1	63.4	79.8	14.1	7	116	63	116	62	115	62
33041638	1	2	1	1	1	1	4	0.5		2	3		3	1	2	0	2	2	0			0	20	0	15			0	20		0	0	167.4	54.2	72	13.3	4	136	85	131	81	133	80
33041639	1	2	1	1	1	1	3	1	7		7			1	0	6	2	1	0	0	10			1	0						0	0	165	66	86.6	22.6	10	122	66	123	70	122	69
33041640	1	3	1	1	0	1	3	1			7			1	0	6	1	0	3					1	0						0	0	158.4	49.5	67.4	8.7	4	148	77	140	83	140	75
33041641	1	3	1	1	1	1	3	0.8		1	7		7	1	0	9	1	0	5			0	30	0	30			2	0		0	1	172.3	56.2	72.8	7.8	3	126	72	116	67	108	67
33041642	1	4	0	1	0		4	1		7	7			1	0	6	2	1	2			6	0	1	0						0	0	170.4	69.1	80.8	20.4	8	131	67	130	65	123	60
33041643	1	1	1	1	1	1	6	1		6			4	1	1	2	1	0	8			4	0					3	0		0	0	163.2	60.4	80.4	25.3	10	171	82	161	84	159	81
33041644	1	1	1	1	0	1	2	0.4	1		5			1	1	2	2	0	2	0	40			0	30						0	0	159.2	50	68	19.3	5	118	75	109	66	106	64
33041645	1	4	1	1	1		3	0.4		5	3		5	1	1	8	2	2	0			0	20	0	15			0	20		9	9	173	80.9	90	27	12	126	78	125	76	125	79
33041646	1	3	1	4	0		4	0.8			5			1	1	2	2	0	1					0	30						0	1	169.4	67.1	89	23.4	9	134	83	125	82	126	82
33041647	1	1	1	2	0		2	0.4		7	7		7	1	2	0	2	2	0			0	20	0	15			0	20		0	0	175.6	80.2	96.5			157	77	160	78	155	70
33041648	1	3	1	1	1		4	0.7	2		2			1	1	2	2	0	1	0	20			1	0					2	9	9	173.6	94.3	109	28.6	20	165	100	158	102	163	103
33041649	1	4	1	1	0	1	5	0.6		5	5		5	1	1	0	2	2	0			0	20	0	15			0	15		1	1	172.1	62.6	73.6	15.3	5	116	72	108	73	113	75
33041650	1	3	1	4	0		6	0.8			2	5		1	1	2	2	0	1					0	30	1	30				1	0	168	62	82	21.2	6	137	88	133	81	132	81
33041651	1	3	1	1	1	1	4	1.2	7		7			1	0	6	2	0	6	8	0			1	0						1	0	167.5	57.2	76	11	5	147	76	139	75	133	82
33041652	1	5	1	1	0	1	5	1.2	1	5	5	5	5	1	0	8	1	0	4	0	30	0	30	0	40	0	59	11	0	2	1	1	171	71.4	79.5	20	9	135	85	132	82	136	81
33041653	1	4	1	1	1	1	3	0.4		5			5	1	1	2	2	2	0			0	15					0	20		1	0	170.1	66.3	86.7	19.8	8	134	81	122	78	120	75
33041654	1	2	1	4	1	1	3	0.7			7			1	0	0	2	0	4					2	0					0	0	0	145.1	47.3	76.8	28.6	10	171	87	174	96	172	92
33041655	1	2	1	4	0	0	2	0.8			7			1	0	8	1	0	3					1	0					2	9	9	148.8	60.1	92.6			144	90	136	85	135	89
33041656	1	1	1	4	0		2	0.5		7				1	0	9	2	0	4			0	45							2	0	0	151.8		77.5			115	56	124	65	115	62
33041657	1	1	4	4	0	0	2	0.8			7			1	0	8	1	0	4					1	0						0	0	162.3		103.2			163	77	164	80	156	77
33041658	1	2	1	1	1	1	7	1.2	2	3	7			1	1	0	1	0	5	0	20	0	30	3	0						1	0	178.1	69.9	83.5	18.9	7	124	71	119	71	117	68
33041659	1	3	1	1	0	1	3	0.4		7	7		7	1	1	2	2	2	0			0	15	0	15			0	20		1	0	171.4	74.4	84	23.8	11	118	72	120	70	118	71
33041660	1	3	1	1	0		4	1.6	2	5	5			1	0	6	2	2	0	0	15	1	0	1	0						1	1	169	59.1	75	17.2	5	115	76	116	77	115	77
33041661	1	3	1	1	0		3	0.7	5	7		4	4	1	1	2	1	0	6	2	40	1	35			2	30	2	0		0	0	160	62	76.8	30.3	6.1	112	65	110	63	110	65
33041662	1	1	1	2	0		2	0.4		7			7	1	1	2	2	2	0			0	20					0	10		0	0	155.2	60.6	87	28.3	15	157	79	148	77	154	80
33041663	1	3	1	1	0		4	0.8		1	7		7	1	0	8	1	0	5			0	30	1	30			0	30		0	0	162.4	48.1	69	11.8	3	122	68	125	70	115	67
33041664	1	3	1	1	1	1	3	0.4		7	7		7	1	1	2	2	0	7			0	10	0	10			0	10		0	0	174.5	80.5	73.7	26.7	13	138	92	133	83	135	85
33041665	1	1	1	4	1		2	0.6		1	7			1	0	7	1	0	3			0	20	1	0					2	0	0	152.5	45.4	77.5	30.1	6	161	91	155	87	151	85
33041666	1	1	1	1	1	1	2	0.8	3		5			1	0	8	1	0	5	8	0			1	0						0	0	156.4	49.1	77.7	20.7	6	127	71	125	71	119	71
33041667	1	3	1	1	0		2	0.4		7			7	1	1	0	2	2	0			0	20					0	20		0	0	164.8	62.1	80.6	20.5	8	117	68	106	68	116	61
33041668	1	1	1	1	0		2	0.4		5	7		7	1	1	2	2	2	0			0	10	0	15			0	10		9	9	158		86.8			192	95	182	91	175	90
33041669	1	1	1	4	1	1	2	0.4			3			1	0	8	1	0	5					1	0					2	9	9	161	56.3	84.5	19.9	9	144	98	145	89	143	88
33041670	1	1	1	2	0		2	0.4		7			7	1	1	2	2	2	0			0	15					0	15	2	0	0	153.4		76.7			170	81	170	79	168	72
33041671	1	2	1	1	0		4	1.6			5			1	0	8	1	0	4					1	0					0	1	0	157.7	71.6	88.2	24.8	15	158	100	159	100	152	95
33041672	1	4	1	1	0		3	0.6	2	2	7			1	0	9	1	0	5	1	0	0	30	2	0						0	0	174.1	75.8	89.8	23.4	9	135	87	135	82	130	80
33041673	1	2	1	1	1	1	6	1	5	7	7		7	1	1	0	1	0	7	4	0	2	0	3	30			1	0	1	0	0	158.4	63	87	24	13	150	89	152	89	145	80
33041674	1	2	4	4	0		1	0.5		7	7		2	1	1	0	1	0	6			0	35	2	30			1	0		0	0	166.5		98.2			126	70	129	70	124	70
33041675	1	5	1	1	0	0	5	0.8		7	5		3	1	1	2	1	0	8			0	45	0	35			1	0		0	0	168.4	76.8	90	23.9	11	130	72	127	68	125	65
33041676	1	1	1	4	0	0	2	0.7		1	7			1	0	8	1	0	5			0	30	0	20					2	0	0	163.3	75.8	93.5	25.2	18	168	95	168	91	162	89
33041677	1	2	1	1	0	1	2	0.7	5	3			4	1	0	9	1	0	6	3	0	3	0					2	0	0	0	0	163.9	68.4	91.7	27.8	14	180	98	176	96	169	94
33041678	1	3	1	2	0		2	0.4		7	7		7	1	1	2	2	1	2			0	15	0	40			0	10		9	9	161.1	54.8	80			126	64	136	72	136	70
33041679	1	1	4	4	0		1	0.6			7			1	1	0	2	0	4					0	30						0	0	165.5	72.8	91	30.1	17	168	77	174	80	160	82
33041680	1	1	1	1	0		2	0.3		7	7		7	1	1	2	2	2	0			0	45	0	40			0	40	2	0	0	172	81.7	96.5	30	18	132	70	123	68	130	72
33041681	1	1	1	4	0		2	0.3			7			1	0	6	1	0	2					1	0						0	0	165.1	55.9	82	31.7	8	134	72	116	79	120	70
33041682	1	3	1	1	1	0	4	0.8		7				1	1	0	2	0	4			1	0								0	0	163.7	65.6	81.8	20.9	9	95	56	90	58	98	60
33041683	1	3	3	1	1	1	3	0.5		7	7		7	1	1	2	2	2	0			0	45	0	20			1	0		1	0	175	64.1	79.8	16.5	6	122	78	125	81	130	70
33041684	1	2	4	4	1	1	1	0.6			7			1	1	0	1	0	3					1	0						0	0	164.8	61.6	85.6	23.1	10	174	92	180	88	170	80
33041685	1	1	4	4	1		1	0.8		4	7			1	1	0	1	0	4			0	30	2	0						0	0	157.5		80.8			126	74	136	71	124	73
33041686	1	2	1	1	0	1	4	0.8	4	4	7			1	1	5	1	0	5	1	0	1	0	1	0					0	0	1	161.8	55.2	78	23.2	7	137	84	136	82	137	82
33041687	1	3	1	1	1	1	3	0.6		3				1	0	7	1	0	3			1	30								0	1	169.2	66	80.1	19.5	8	103	65	101	66	105	64
33041688	1	1	1	1	0	1	2	0.6		5	7			1	1	0	1	0	5			1	0	0	30						0	0	168.2	65.8	86.4	28.1	10	128	84	122	82	119	81
33041689	1	1	1	2	1		2	0.5		7	7		7	1	1	5	1	0	5			0	15	0	10			0	10		9	9	158.2		94.4			164	69	149	69	140	63
33041690	1	1	1	2	0		2	0.5		7	7			1	1	5	1	0	5			0	40	0	15					2	9	9	150.1	50.6	82.5	28.8	11	140	69	137	68	130	67
33041691	1	2	1	4	0	0	2	0.8		7	7			1	0	6	1	0	3			1	30	1	30						0	0	164.4	74.8	90.8	28.1	18	130	85	137	84	145	85
33041692	1	1	1	4	0		1	0.6		7	7			1	1	2	1	0	5			1	0	2	30						0	0	156.1		79.9			179	80	174	90	179	83
33041693	1	2	1	1	0		3	0.4		7	7		7	1	1	5	1	0	8			0	15	0	10			0	15		9	9	168.3	73.6	87.8	23.5	13	125	87	132	88	130	90
33041694	1	1	1	2	0		2	0.4		7	7		7	1	1	5	2	2	0			0	20	0	10			0	10	2	0	0	159		91			118	69	126	67	126	71
33041695	1	4	1	1	0		4	1		3	7			1	0	6	2	0	3			0	30	4	0					1	0	0	163.2	57.8	82	19.5	6	161	105	168	103	156	103
33041696	1	6	1	1	0		4	0.4		7	7		7	1	1	5	2	2	0			0	15	0	15			0	20		1	0	172	78.9	91.5	28.8	11	115	77	111	73	110	70
33041697	1	5	1	1	0	1	6	0.7		5				1	0	7	1	0	3			1	30								0	0	173.4	66.3	79.3	20.6	7	112	71	114	68	114	63
33041698	1	1	4	4	0		2	0.6		5	7			1	0	8	2	0	3			0	40	2	0						0	0	159.9	57.4	79.4	27.1	10	140	89	143	87	145	84
33041699	1	5	1	1	1	1	3	0.6			7			1	0	6	1	0	3					0	30						0	0	168.1	79.9	93.8	27.8	14	141	88	138	85	137	83
33041700	1	5	1	1	1		3	0.8			7			1	1	0	2	0	3					0	30						0	0	163.5	84.5	99.6	23.5	16	131	78	122	77	113	79
33041701	1	1	1	2	0		2	0.4		7	7		7	1	1	5	2	2	0			0	15	0	15			0	15		0	0	164.8	67.7	92.4	25.6	13
33041702	1	1	1	2	0		2	0.4		7	7		7	1	1	5	2	2	0			0	15	0	15			0	15		9	9	167	81.7	101.1	32.4	21	152	92	155	86	144	85
33041703	1	1	4	2	0		1	0.4		7	7		7	1	1	0	2	2	0			0	10	0	15			0	15	2	9	9	155		76			182	69	182	75	179	70
33041704	1	1	1	1	1	1	3	0.4		7	7		7	1	1	3	2	2	0			0	40	0	15			0	40		1	1	175.6	73	86	17.1	9	137	90	142	85	142	82
33041705	1	1	1	4	0	1	2	0.5		7	7		2	1	1	0	2	0	6			0	30	2	30			1	0	2	0	0	162.3	65.1	89.6	23.7	13	153	62	149	59	144	58
33041706	1	1	1	2	0		2	0.4		7	7		7	1	1	2	2	2	0			0	15	0	15			0	15		9	9	167.4	69.4	89.1	25.7	13	123	77	121	78	138	83
33041707	1	2	1	1	0		2	0.6		7	7			1	1	5	1	0	6			0	30	0	40						9	1	163.3	63.5	87.2	27.3	12	119	77	114	73	120	75
33041708	1	3	1	1	0	0	5	0.8		1				1	0	8	1	0	3			8	0								0	0	176	69	86	19.8	6	120	71	120	66	116	72
33041709	1	2	1	2	0		2	0.4		7	7		7	1	1	2	2	2	0			0	15	0	20			0	15		9	9	150.2	51.6	79	25.1	11	121	46	128	42	121	56
33041710	1	2	1	1	1	1	3	0.7		7				1	0	7	1	0	3			0	30								1	0	164.8	59.9	81.7	14.7	7	205	129	226	128	212	128
33041711	1	1	1	4	0	1	2	0.7		7	7		7	1	1	0	1	0	5			0	20	3	0			2	0		0	0	160.1	57.9	74.8	21.9	10	143	62	142	61	140	58
33041712	1	2	1	4	1		3	0.8			7			1	0	6	2	0	3					0	20						0	0	171.7	50.7	73.5	16	2	96	56	97	57	92	60
33041713	1	2	1	1	0	1	3	0.7		2	4			1	0	8	1	0	3			1	0	1	30						0	0	182.8	88.3	97	27.2	12	149	92	132	87	135	85
33041714	1	3	0	1	1		2	0.8		3	7			1	0	6	2	0	2			1	0	1	0						0	0	170	59.4	80.2	17.3	5	116	76	114	72	116	72
33041715	1	5	1	1	0	0	6	1		1	7			1	0	9	1	0	5			0	10	0	30						1	0	166	52	75.5	19.3	3	111	62	110	61	97	64
33041716	1	3	1	1	0	1	3	1	3		7	3		1	0	6	1	0	3	1	0			2	30	0	30			2	1	0	164.5	66.5	87	23.7	10	165	86	142	90	134	87
33041717	1	4	1	1	0	1	3	0.6	7	1	7			1	1	5	1	0	5	0	50	0	20	0	30						0	0	167	57.4	74.5	12.7	5	128	75	122	61	116	65
33041718	1	3	1	4	0	1	2	0.6			7			1	0	9	1	0	2					1	0					1	0	0	160	61.2	88.5	26.8	12	178	94	187	94	168	82
33041719	1	2	1	4	0		3	1	3		4			1	1	2	2	0	3	1	0			1	0						0	0	147.6	57	85.5	28.8	17	125	75	125	78	118	74
33041720	1	4	1	1	1	0	5	1.2		1	7			1	1	2	1	0	3			0	20	0	15						0	1	172	60.4	75.4	13.4	4	118	72	118	67	111	64
33041721	1	3	1	4	0	1	2	0.7		4	5			1	0	8	1	0	3			1	0	1	0						0	0	173.8	70.2	91	24.6	11	145	81	135	116	141	82
33041722	1	1	1	1	0		5	1.2	7		7			1	1	5	1	0	5	7	30			1	30						0	0	171.4	59.1	83.5	19.8	6	161	91	149	91	147	90
33041723	1	1	1	4	0		2	0.6		3	7			1	1	0	1	0	5			0	20	0	30					2	0	0	166.6	61.8	84.4	24.8	10	144	70	161	80	135	67
33041724	1	2	1	4	0		2	0.8		3	7			1	0	6	1	0	2			0	30	0	30						0	0	162.5	64.3	83.7	24.6	12	124	73	126	72	124	73
33041725	1	5	1		0	0	6	0.9		1				1	0	7	1	0	3			1	20								0	0	173.8	67	85.2	20.5	6	120	75	122	75	122	71
33041726	1	1	1	4	0		2	0.6			3			1	0	5	1	0	3					0	40						0	0	152.9	60.8	87	29.9	16	137	86	139	81	132	81
33041727	1	1	4	4	2		1	0.4		7	7		5	1	1	2	2	0	8			0	30	0	50			1	0		0	0	164.5	68.3	86	22.2	14	144	73	124	74	132	74
33041728	1	1	1	4	0		2	0.6			7			1	1	0	1	0	3					2	0						0	0	174	71.2	92.3	26.6	11	160	92	151	94	163	90
33041729	1	5	0	1	0		4	1	7		7	2		1	0	8	1	0	2	1	0			0	30	0	30				1	1	164	54.8	72	10.5	4	120	70	112	65	111	64
33041730	1	5	1	1	1	1	6	1.4						1	0	8	1	0	3												0	0	182.1	86.2	91.2	23.6	10	134	70	128	72	132	72
33041731	1	1	1	4	2	1	2	0.6			3			1	0	9	1	0	3					0	30					2	0	0	169.8	66.1	84.7	24.2	10	163	94	159	90	144	91
33041732	1	3	1	4	1	1	6	0.7		3				1	0	6	1	0	3			1	30								0	0	173.5	61.6	81	17.6	4	116	78	133	70	121	76
33041733	1	4	1	1	1	1	5	1		2	3			1	1	0	1	0	3			0	30	0	30						1	1	167.3	63.6	83.5	22	7	141	91	135	92	134	90
33041734	1	2	1	4	0	0	2	0.7		7	7			1	0	7	1	0	3			0	15	0	20						0	0	154.1	49.3	80.5	24.7	8	129	80	127	79	124	78
33041735	1	4	1	1	1	1	6	1.2		7	7	1		1	1	2	1	0	5			0	30	2	30	0	40				0	0	164	63.5	81.7	19	8	113	77	117	79	119	73
33041736	1	3	1	1	1	1	2	0	7		7			1	0	6	1	0	3	4	0			1	0						1	0	160.3	45	72	15.1	2	146	89	144	87	149	86
33041737	1	3	1	1	0		6	1.2	2	2	7	1		1	1	2	1	0	5	0	10	0	30	2	0	1	0				0	0	181.2	70.2	82	19.5	5	122	75	123	76	114	72
33041738	1	3	1	1	1		5	1	6			4		1	1	0	1	0	4	0	40					1	0				0	0	161.2	59.4	72	12.8	7	157	90	158	93	150	89
33041739	1	3	1	1	1	0	5	0.8		3				1	0	7	1	0	3			1	0								0	0	186.2	65.4	75.5	11.9	2	132	84	131	83	140	82
33041740	1	5	1	4	0		5	1.2		7	7	3		1	1	2	1	0	5			1	0	0	30	0	40				1	0	173.8	67.4	81	17.7	6	138	75	125	70	123	68
33041741	1	2	1	1	1	1	3	0.8	7		7			1	1	2	1	0	4	8	0			1	0						0	0	162.8	51.4	72.7	15.6	4	113	74	113	74	104	73
33041742	1	4	1	1	0	0	6	0.9		3				1	0	8	1	0	3			0	30								0	0	177.5	75	87	20.4	8	122	68	119	73	109	71
33041743	1	5	1	1	1	1	5	1			7		1	1	0	6	2	0	6					0	30			2	0		0	1	173.4	77.6	89.9	24.2	10	136	80	134	80	128	73
33041744	1	2	1	1	1	1	4	1	7		7			1	0	6	1	0	3	4	0			1	0						0	1	160.1	60	79.8	18.4	8	116	60	108	59	105	56
33041745	1	3	1	2	0		2	1		7	4			1	0	9	1	0	3			0	30	0	30					2	0	0	157.8	68.4	95	32	17	158	82	143	88	142	82
33041746	1	3	1		0	1	2	0.5		3	3			1	0	6	1	0	3			0	40	0	30					2	0	0	161.1	67.6	88	23.5	14	130	74	128	70	123	75
33041747	1	5	1	1	0		4	0.8		7			4	1	0	9	2	0	6			1	30					0	45		0	1	163.8	66	80	17.9	9	129	70	124	70	120	68
33041748	1	3	1	1	1	1	3	0.8						1	0	1	1	0	3												1	1	165.9	71.2	88	20.7	12	127	62	116	73	119	75
33041749	1	2	1	1	1		4	1.2	7		7			1	1	0	1	0	3	9	0			7	0						0	0	158.4	61.3	84.3	23	10	156	87	182	90	169	89
33041750	1	3	1	1	1	1	3	0.7		7				1	0	7	1	0	3			1	0								1	1	169.1	71.8	82.8	22.9	10	136	82	129	77	131	80
33041751	1	4	1	1	0	1	6	2		1	7			1	1	2	1	0	5			0	30	0	30						0	0	167.8	65.1	83.7	23	8	131	69	131	68	119	65
33041752	1	3	1	4	1	1	5	0.9		3				1	0	8	1	0	4			0	30								1	1	177.1	72.4	86.8	23.3	7	143	93	123	85	130	88
33041753	1	2	1	1	1		3	0.8	3					1	0	9	1	0	3	0	40										9	9	174.8	58.6	78.8	12.3	3	127	77	128	81	127	60
33041754	1	5	1	1	0		4	1		1	7			1	0	6	2	0	3			1	0	0	30						1	0	169.8	81.4	91.2	26.7	12	149	79	125	85	130	81
33041755	1	3	1	1	1	1	4	0.8	7					1	0	8	1	0	4	4	0										0	0	161.1	60.8	81.7	19.4	9	132	81	133	93	119	79
33041756	1	4	1	1	1	0	5	2	7	1	7			1	1	2	1	0	4	5	0	0	30	2	30						1	0	170.8	93.3	98.6	29.2	18	128	78	125	75	121	78
33041757	1	4	1	1	2		8	1.5			7	3		1	0	6	1	0	4					2	0	0	15				0	0	166.9	51.7	72	13.4	3	110	62	105	63	108	61
33041758	1	4	1	1	0	0	5	0.7		7	7			1	0	8	1	0	3			4	0	0	40						0	1	163.4	59.4	79	18.4	7	113	78	119	82	119	79
33041759	1	4	1	1	1	1	3	0.8		3				1	0	6	1	0	4			0	40								0	0	173.9	79.8	89.8	23.1	11	142	76	129	74	126	55
33041760	1	4	1	1	0	1	6	1			7			1	0	5	1	0	3					0	40						0	0	173.4	87.9	95	26.7	14	142	92	137	85	130	88
33041761	1	4	1	1	1	0	5	0.7		1				1	1	0	1	0	3			0	30								0	0	175.7	72.2	88.8	21.4	7	138	82	131	83	128	79
33041762	1	3	1	1	0	1	3	0.8	6		7			1	1	0	1	0	3	0	30			0	30						0	0	164.3	58.3	79.2	18.2	6	126	68	122	68	124	68
33041763	1	5	0	1	1	1	1	0.6			3		1	1	0	8	1	0	4					0	20			2	0		0	0	163.5	69.1	85.3	20.6	9	135	80	131	77	126	75
33041764	1	2	1	1	1		4	1.5	3	5	7			1	1	2	1	0	7	3	0	1	0	0	30						0	0	164.6	71.9	90.4	25.5	13	152	80	140	83	139	81
33041765	1	3	1	1	0	1	3	0.4		7	7		7	1	1	2	1	0	8			0	20	0	15			0	15		0	0	162.8	70.2	84	20	12	115	75	108	71	108	68
33041766	1	1	1	1	1	1	3	0.7		7			7	1	1	2	2	0	9			2	0					2	0		0	0	168.6	72.5	87.6	19.9	11	125	71	123	75	111	74
33041767	1	4	1	1	1	0	5	1.2		7	7			1	1	3	1	0	3			0	30	0	30						0	1	167.4	68.7	85.4	22.8	9	121	70	120	69	111	65
33041768	1	5	1	1	0		3	0.4		7	7		7	1	1	2	2	2	0			0	15	0	10			0	15		0	0	175.5	59	74.8	14.4	3	118	66	107	60	112	59
33041769	1	2	1	1	1		5	0.4		7	7		7	1	1	2	2	2	0			0	15	0	15			0	15		9	9	165.9	90.8	112.2	35.2	24	135	81	127	80	121	81
33041770	1	3	1	4	0	1	6	0.5						1	0	6	2	0	2												0	0	175.4	68.8	84.9	22.8	6	130	87	126	81	118	81
33041771	1	3	1	1	1	1	7	1.2		2	7			1	1	2	1	0	5			0	30	0	20						0	0	172.8	93	106.4	31.4	16	113	45	112	59	103	59
33041772	1	3	1	1	0	1	4	0.5		7	7		7	1	1	2	2	2	0			0	10	0	15			0	30		1	0	177.4	75.3	87	20.9	8	141	76	129	74	130	78
33041773	1	4	1	1	0	1	4	0.8						1	1	0	3	0	1												0	0	168	50.6	72	19.2	2	130	74	117	69	114	72
33041774	1	2	1	1	0	1	4	0.5		5	5		5	1	1	5	2	2	0			0	15	0	15			0	15		1	0	160	51.7	69	18.6	5	141	89	132	93	126	82
33041775	1	5	1	1	1		5	0.4		7	7		7	1	1	2	2	2	0			0	15	0	15			0	15		0	0	177.4	59.5	72	11.7	3	104	57	100	50	91	51
33041776	1	5	0	1	0	1	3	0.6			5	4		1	1	2	2	0	2					0	30	0	30				1	0	172	86.4	93	28.2	13	127	64	123	62	113	57
33041777	1	4	1	1	2	1	5	1		7	7			1	1	0	1	0	5			0	30	0	30						1	0	175.2	79.8	89	23.9	10	101	59	99	55	90	59
33041778	1	2	1	1	0	1	6	1.5	7	3	7			1	1	0	2	0	3	0	30	1	0	2	30						0	0	168.6	85.4	102.1	26.8	17	151	91	133	82	129	85
33041779	1	1	1	4	0		2	0.3	2		5			1	1	2	2	0	2	0	50			0	30						0	0	163	75.3	93	28.2	16	128	79	112	74	124	76
33041780	1	4	1	1	1	1	6	0.6		7	7		7	1	1	5	2	2	0			0	20	0	15			0	10		1	0	171.2	80.3	90.5	25.9	12	126	68	119	68	116	66
33041781	1	5	1	1	0		3	0.5	1		2			1	1	2	2	0	4	0	30			0	30						0	1	174	71.4	86.6	21.6	8	130	73	112	69	119	66
33041782	1	5	0	1	0		6	0.8			6	3		1	1	2	2	0	2					0	30	0	45				1	1	171.5	85.5	102	30.5	14	128	90	132	89	124	89
33041783	1	5	1	1	0	0	8	1.5		1	7		1	1	1	2	1	0	4			0	20	2	30			2	30		0	1	164.1	63.8	81.7	21.2	8	122	60	120	56	119	59
33041784	1	2	1	2	0		2	0.4		7	7		7	1	1	2	2	2	0			0	15	0	10			0	10	2	0	0	157	52.7	80.6	25.9	9	154	71	159	66	146	72
33041785	1	3	1	1	0		5	0.5		3	7		1	1	0	6	1	0	3			0	15	0	15			0	20		1	0	172.4	67.4	83.7	20.5	7	133	79	118	70	112	70
33041786	1	2	1	1	1	1	6	0.6		7	7		7	1	1	2	2	2	0			0	15	0	10			0	15		0	0	173	83.9	93.8	26.2	15	123	72	134	73	126	78
33041787	1	1	4	2	1		1	0.3		7	7		7	1	1	2	2	2	0			0	10	0	10			0	10		0	0	153	54	85.9	22.9	11	128	73	140	71	112	65
33041788	1	4	1	1	0		5	0.6	2	5	3		7	1	0	9	2	0	2	1	0	5	0	1	0			2	0		0	0	173	65.9	83	20.4	6	118	59	110	58	117	55
33041789	1	5	1	1	0		6	0.8			3	7		1	0	8	2	0	4					1	0	3	0				0	0	171.6	75	89.7	22.6	9	115	68	117	67	112	63
33041790	1	3	1	1	1	1	5	0.5		7	7		7	1	1	5	2	2	0			0	15	0	15			0	10		0	1	173	61.2	73.8	16.8	5	130	72	122	70	125	57
33041791	1	4	1	1	0	0	5	0.8	1		3			1	1	2	2	0	3	0	15			0	30						1	0	172.1	64.5	80.8	23.1	6	105	62	101	59	108	55
33041792	1	4	1	1	2		18	3		7	7			1	1	2	2	0	4			0	30	0	40						0	1	168.8	63.6	82.9	21.1	6	119	75	113	73	116	79
33041793	1	5	1	1	0		5	0.5			1		1	1	0	9	1	0	2					1	0			0	30		0	1	171.3	68.1	81.1	21.6	7	123	75	121	73	121	73
33041794	1	5	1	1	0	0	6	0.6		1	3		1	1	0	8	1	0	4			0	20	0	20			1	0		0	0	186.6	98.8	102.3	24.4	13	146	80	137	82	134	77
33041795	1	2	1	1	0	1	2	0.4		7	7		7	1	1	2	2	2	0			0	15	0	15			0	15		9	9	169.8	72.9	91.5	28.8	14	137	86	134	85	116	85
33041796	1	5	0	1	0		3	0.8		7	2			1	1	0	2	0	8			1	20	1	30						1	0	161.2	57.1	79.2	19.3	7	135	79	126	75	155	68
33041797	1	2	1	1	0	0	4	0.8			2			1	0	8	2	0	4					0	30					2	0	0	161.8	76.7	92	24.1	17	156	94	140	93	149	89
33041798	1	1	4	4	0		1	0.4		2				1	0	5	1	0	2			0	12								0	0	168		83			162	78	158	78	144	74
33041799	1	5	1	1	0		5	1		7				1	0	9	2	0	8			2	0								0	0	181	80	80	10	8	118	70	120	80	126	76
33041800	1	4	0	1	0	0	5	0.6		7	7		7	1	1	5	2	2	5			0	15	0	15			0	15		0	0	169.5	78	90.8	25.2	11	131	75	126	73	138	72
33041801	1	5	1	1	0		3	0.7		7				1	0	8	1	0	4			1	40								0	0	168.1	67.2	82	19.1	8	105	63	115	66	113	65
33041802	1	5	1	1	1		3	0.7		7	4			1	1	2	2	0	8			2	0	1	0						0	0	175	85	85	24	8	144	90	138	80	132	82
33041803	1	1	1	4	0		2	0.3			5			1	0	8	2	0	4					2	0						9	9	160	57.9	83	27.9	10	141	77	151	71	153	80
33041804	1	4	1	1	0		4	0.6					1	1	0	6	1	0	2									0	20		0	1	174.4	84.3	92.3	26.8	12	144	84	148	83	148	83
33041805	1	4	1	1	0		7	0.6					1	1	0	6	1	0	2									0	30		0	0	174.4	72.8	85.6	19.2	8	130	76	124	71	125	66
33041806	1	2	1	4	0	1	3	1	2		7		7	1	0	6	1	0	2	2	30			4	0			0	20		0	0	164.8	69.9	88.8	24	13	99	66	100	68	104	60
33041807	1	2	1	1	1		4	1	7		7			1	1	0	1	0	2	4	0			4	50						0	0	163.3	70.1	90	25.1	13	144	73	131	71	132	70
33041808	1	1	1	1	0		5	0.6		1	7		7	1	1	5	2	3	0			0	20	0	15			0	30		0	0	154.3	76.4	95	28.8	22	160	86	152	85	154	90
33041809	1	2	1	1	1		2	1.5	7	7	7			1	1	0	1	0	5	2	0	5	0	1	0						0	0	167	71.3	86	18.7	11	126	71	124	73	122	69
33041810	1	1	1	4	1	1	2	1	4		7			1	0	8	1	0	3	0	30			2	0						0	0	164.2	70.9	91	28.3	17	134	74	131	73	122	71
33041811	1	2	1	1	0		3	0.8						1	0	9	1	0	4												9	1	172.7	72.2	83	18.4	9	127	88	127	81	127	62
33041812	1	1	1	4	1		2	2			7			1	0	5	3	0	8					3	0					0	0	0	160.1	61.4	85.6	21.5	12	199	90	208	89	189	89
33041813	1	2	1	1	0	1	4	0.6		7	7		7	1	1	5	2	2	0			0	30	0	20			0	15		0	0	164.5	72	90	26.5	14	129	79	114	77	109	72
33041814	1	1	1	1	1	1	2	1	7	7	7			1	0	5	1	0	3	8	0	2	0	2	0						0	0	164.1	60.2	78.8	16.5	8	147	92	147	87	128	89
33041815	1	3	1	1	1	0	3	0.5		7	7		7	1	1	2	2	2	0			0	15	0	15			0	15		0	1	159.1	60.4	80.7	22.1	9	134	84	135	86	127	82
33041816	1	2	1	1	0		5	1	2					1	1	0	1	0	4	0	40										9	9	169.1	76.8	86.3	23.7	13	138	91	128	95	144	86
33041817	1	2	1	4	0	1	2	1.5		7	7			1	0	5	1	0	5			0	20	0	30						0	0	162	53.7	76.4	21.7	6	171	86	174	90	162	84
33041818	1	4	1	1	0	0	5	1.2						1	1	0	1	0	4												1	0	181.5	72.9	82.7	18	6	89	68	99	54	99	47
33041819	1	2	1	1	0	1	5	0.6		7	7		7	1	1	2	2	2	0			0	15	0	15			0	20		0	0	158.6	60.7	83	19.5	10	137	85	117	77	126	75
33041820	1	3	1	1	0	1	3	0.8		7	5		5	1	1	2	1	1	0			1	0	1	30			1	0		0	0	174.5	71.6	88.4	23	9	133	82	110	79	116	79
33041821	1	3	1	1	1		5	1	7					1	0	8	1	0	3	1	0										0	1	173.2	73.7	86.8	22.4	9	131	63	131	66	116	67
33041822	1	3	1	1	1	1	4	0.8						1	0	8	1	0	4												0	0	164.4	67	81.5	19.7	9	118	87	120	70	113	53
33041823	1	5	0	1	0		3	1			7			1	0	8	2	0	3					0	30						0	0	174.6	77.1	89	23.3	9	123	79	120	74	122	70
33041824	1	5	1	1	1		3	0.8		3	7			1	0	6	1	0	3			0	30	2	30						0	1	163.3	54	76.8	16.5	5	111	68	114	72	106	68
33041825	1	2	1	1	0		3	1		7	7			1	0	8	1	0	3			0	30	0	30						0	0	163.3	61.8	81	21.3	9	121	73	90	78	112	72
33041826	1	3		1	1		6	0.9	5	5				1	1	2	2	0	6	2	0	2	0								0	0	159.1	57.9	78.2	15.1	8	121	70	112	70	106	64
33041827	1	2	1	1	1	1	3	0.8	3					1	0	9	1	0	4	0	40										0	0	160.5	68.1	90	24.3	13	163	94	178	92	152	91
33041828	1	2	1	1	1	1	3	0.7	3					1	0	8	1	0	3	0	30										0	0	162.6	64.6	85.5	19.3	10	145	90	144	84	134	87
33041829	1	1	1	1	0		3	0.8		7	5			1	1	2	2	0	9			1	0	1	0						0	0	163	66.1	87	21.5	10	117	77	139	77	119	68
33041830	1	1	1	4	2		5	1.2			4			1	0	8	2	0	8					0	30						0	0	170.2	87.7	97	28.6	18	143	79	135	73	131	67
33041831	1	4	1	4	0		4	1	7		7			1	0	6	2	0	4	0	30			0	30						0	1	164.4	55.9	73	14	5	101	52	111	61	99	56
33041832	1	1	1	1	1		4	0.8	7				4	1	1	2	1	0	3	4	0							2	0		0	0	162.3	57.5	73	12.1	7	135	81	137	71	127	77
33041833	1	3	1	1	0		6	2			7		3	1	1	0	1	0	5					0	30			0	30		1	0	167.6	50.9	72.8	17	3	107	70	109	72	107	69
33041834	1	5	1	1	0	0	5	2		2	7			1	0	5	2	1	0			0	20	0	20						0	0	173	73.9	83.4	21.1	9	112	70	110	68	112	63
33041835	1	3	1	1	0		2	0.6		7	7		4	1	1	2	1	0	9			1	20	1	30			1	20		0	0	164.8	76.4	88	22.6	14	200	123	198	119	171	120
33041836	1	5	1	1	0		4	0.8			7			1	0	8	1	0	2					0	30						0	0	165	90.3	100.7	28.3	19	129	75	130	79	118	75
33041837	1	1	0	4	0		3	1			7			1	1	0	1	0	5					2	0						0	0	151.8	51.9	77.3	22.6	8	134	72	130	68	122	70
33041838	1	5	0	1	0	0	3	0.8		4	5	3		1	0	8	1	0	2			0	20	0	30	0	30				0	0	167.6	71.1	83.3	22.7	9	112	57	116	59	113	59
33041839	1	3	1	1	1		3	0.8		4			4	1	1	2	1	0	8			2	0					1	0		0	1	171.2	76.8	96.6	26.4	12	138	88	138	89	143	88
33041840	1	1	1	4	0		2	0.6						1	0	9	1	0	3												0	0	170	78.1	93.1	29	17	156	91	157	90	149	82
33041841	1	1	1	4	1	0	3	0.4			2		1	1	0	8	3	0	2					0	30			2	0		0	1	166	72.8	94.5	27.6	12	149	90	153	98	142	92
33041842	1	2	1	4	1		3	1			7			1	0	8	2	0	3					0	40						0	1	172.5	59.8	81.4	22.7	5	137	92	131	95	141	93
33041843	1	3	1	1	1		3	0.7		5	2		2	1	1	2	1	1	0			1	20	0	30			0	30		0	0	173.4	58.4	73.1	12.7	3	123	75	116	69	117	70
33041844	1	3	1		1	1	5	1			7			1	1	0	1	0	2					1	0						0	0	180.6	61.4	70.6	11.4	3	128	80	136	88	126	80
33041845	1	3	1	1	0		3	1.5		7	7			1	1	0	1	0	3			8	30	0	25						0	0	177.2	59.5	70.5	10.5	3	115	79	120	73	121	72
33041846	1	3	1	1	1	1	8	0.8	7	1	2		1	1	0	8	1	0	2	4	0	0	30	0	45			0	45		0	0	170.6	64	73.5	16	6	129	78	119	72	120	74
33041847	1	5	1	1	0		5	1						1	0	9	1	0	4												0	1	172.8	60.3	70	12.5	4	111	66	118	63	110	58
33041848	1	1	1	4	2	0	3	1.5		7	7			1	1	0	1	0	3			0	40	1	0					0	0	0	171.8	86	102	29.6	16	147	99	144	89	150	98
33041849	1	3	1	1	0	1	4	0.9	7	4			4	1	1	4	2	1	0	4	30	1	30					1	30		1	1	166.2	70.6	84.3	18.1	11	122	78	120	80	115	80
33041850	1	2	1	1	1	0	3	0.4			2			1	0	8	2	0	2					0	45						0	1	173.5	70.3	83.2	69.1	8	133	81	125	79	133	79
33041851	1	2	1	1	2		3	0.7						1	0	8	1	0	4												0	1	171.2	76.8	90.3	25.5	11	139	75	133	78	142	84
33041852	1	5	1	1	0		2	1.5			7	2	2	1	0	5	1	0	3					0	20	0	40	0	30		0	0	172.2	51.6	74.5	22.8	2	120	62	115	55	113	50
33041853	1	4	1	1	0		6	1.5			7			1	0	8	2	0	4					0	20						0	1	170	68.5	87.1	25.8	8	116	58	115	58	106	56
33041854	1	5	1	1	1		3	0.8		7	2		2	1	1	2	1	1	0			0	30	0	30			0	30		0	1	166	71.4	91.5	27.3	12	140	91	130	90	131	86
33041855	1	2	1	1	0	0	4	0.9		5	5		4	1	1	2	1	1	2			3	0	1	0			1	20		0	0	165.4	68.4	88.2	22.6	10	124	78	120	81	122	76
33041856	1	3	1	1	1	1	3	0.8		1	2	1		1	0	8	1	0	2			0	30	0	45	1	30				9	9	170.2	71.8	88.7	22.5	10	101	60	101	59	102	60
33041857	1	5	0	1	0		3	0.7						1	1	2	1	0	4												0	0	170.6	71.7	84	22	9	112	72	110	74	110	73
33041858	1	4	1	1	2		6	0.8			2		5	1	0	6	1	0	2					0	45			0	30		0	0	169	71.5	83.1	21.9	9	127	67	123	60	129	59
33041859	1	5	1	1	0		8	1.3		7	4		4	1	0	8	1	1	0			2	0	1	30			1	30		0	0	161.4	58.6	77.3	19.3	7	133	65	128	62	118	61
33041860	1	3	1	1	1	1	7	2		7	3		2	1	0	7	1	0	3			0	30	0	30			0	30		0	0	172	84.3	85.8	23.4	13	125	70	131	71	124	68
33041861	1	3	1	4	1	1	4	2			7			1	0	6	1	0	2					0	30						1	1	169.8	65	75.8	14.6	7	113	55	104	60	106	56
33041862	1	5	1	1	0		8	0.9		7	4		4	1	1	4	1	0	8			1	30	2	0			2	0		0	0	170	70	87	19.8	8	130	68	126	70	122	74
33041863	1	3	0	1	0	0	5	0.8			2		1	1	0	6	1	0	2					0	45			0	45		0	0	165.8	54.3	74.2	17.1	4	112	59	107	64	111	61
33041864	1	5	1	1	0		4	1	3		7			1	0	6	1	0	2	0	12			0	30						0	0	169.2	49.3	65.4	12.7	1	125	78	121	75	120	74
33041865	1	5	1	1	2		5	1.4						1	1	0	1	0	4												0	1	167.4	91.4	102.3	29.3	17	137	67	128	65	131	64
33041866	1	3	1	1	0	1	4	1.5			7			1	0	6	1	0	3					0	30						0	0	167.6	76.9	90.5	25	12	147	88	139	82	130	79
33041867	1	4	1	1	1	0	5	0.9		7			4	1	1	0	1	0	8			0	40					3	0		0	0	169.3	78.2	86.6	25.8	12	129	85	126	81	125	79
33041868	1	5	1	1	0		4	1.5		7	3		2	1	0	6	1	0	3			0	30	0	30			0	30		1	0	169.6	67.8	84.5	23.9	8	103	66	98	65	100	61
33041869	1	1	1	4	0		2	0.3			5		7	1	0	6	1	0	2					0	30			1	0		9	9	153.8	56	76.5			177	62	170	79	162	73
33041886	1	2	1	4	0	0	2	0.4			3		5	1	0	6	1	0	2					0	40			1	0	2	0	0	163	65	77.3	26.5	13	139	67	119	65	118	62
33041887	1	1	1	4	0	1	2	0.6			4			1	0	8	1	0	3					0	40						0	0	160.3	46.1	76	18.6	3	146	53	141	61	144	64
33041888	1	1	1	4	0		2	1			7			1	1	2	2	2	0					1	0					2	0	0	154.5	45.9	71			140	74	139	70	136	72
33041889	1	2	1	4	0		2	0.6		3	6		6	1	0	8	1	0	3			0	30	1	0			1	0	0	0	0	167.8	79.3	97.5	30	19	144	83	144	79	143	74
33041890	1	1	4	4	0	0	1	0.2		7	5		5	1	0	6	1	0	2			1	0	0	40			1	0		0	0	167.5	70.2	92.5			122	74	114	64	105	66
33041891	1	1	1	2	0		2	0.4		7	7		7	1	1	2	2	2	0			0	15	0	15			0	10	2	0	0	160.6	61.7	80.4	23.9	12	137	84	139	91	136	86
33041892	1	1	1	4	1		2	0.6						1	0	6	1	0	3											2	0	0	162	52	78	27	6	133	84	135	88	132	89
33041893	1	1	1	4	0		2	0.5			7			1	1	2	2	1	2					1	0						0	0	162.6	72.5	93.8	25	17	121	80	127	82	122	79
33041894	1	2	1	4	0		2	0.6			7			1	0	7	1	0	5					0	25					2	0	0	167.6	54	69.3			155	72	168	67	168	67
33041895	1	2	1	4	1	1	2	0.7			7			1	1	2	2	1	5					1	0						0	0	157.4	55.3	78.7	28.4	10	114	66	121	60	116	64
33041896	1	1	1	2	0		2	0.3		7	7		7	1	1	2	2	2	0			0	10	0	20			0	10	2	0	0	165	57.2	79	24.9	8	160	79	168	80	173	80
33041897	1	1	1	4	0		2	0.6			4			1	0	6	1	0	3					0	40					2	0	0	161.3	78.4	98			163	73	161	75	165	74
33041898	1	1	1	4	0		2	0.7			7			1	1	2	2	1	2					1	0					2	0	0	166	52.8	68.8	17.5	5	129	84	128	78	134	80
33041899	1	1	4	2	1		1	0.4		7	7			1	1	2	1	0	3			0	40	1	0						0	0	163	60.6	81	25.5	11	147	80	144	76	146	74
33041900	1	4	1	1	0		4	0.8		2	2	1		1	0	6	1	0	2			0	30	0	30	1	0				0	0	168.2	67.8	77.3	12.7	8	149	82	138	82	135	72
33041901	1	1	1	2	0	1	2	0.3		5	7		7	1	1	2	2	2	0			0	10	0	10			0	15		9	9	168.2	67	82.3	27.5	12	120	77	128	89	118	77
33041902	1	3	1	1	1	1	8	1.5		7	7			1	1	0	1	0	5			8	0	0	30						1	0	170	66.2	78.8	16.7	7	119	82	123	80	122	78
33041903	1	2	1	4	0	1	2	0.3		2	3			1	0	6	1	0	2			0	30	1	0						0	0	163.5	63.7	85	23.4	12	130	75	128	73	126	72
33041904	1	3	1	1	2	1	6	1		1	7			1	1	2	2	2	0			0	10	1	0						0	1	174.2	90.7	96.2	26.7	15	142	86	141	87	135	80
33041905	1	4	1	1	1	1	6	1.5		7	7			1	1	0	1	0	5			0	30	2	0						0	1	163	63.2	82	22.9	8	137	88	124	85	132	98
33041906	1	1	1	4	0		2	0.7			7			1	1	0	2	1	5					0	30						0	0	159.5	74	93			153	69	144	68	141	68
33041907	1	4	0	1	0	0	3	0.5		4	2		4	1	0	6	1	0	2			1	20	0	40			0	45		0	0	166.8	63.5	79.5	16.8	6	120	71	112	69	116	63
33041908	1	3	1	1	1	1	5	2			3			1	0	5	1	0	4					0	30						0	1	173.4	68.6	79	16.8	7	133	92	142	92	136	86
33041909	1	3	1	1	1	1	4	2	6		3		4	1	0	8	1	0	4	8	0			0	30			0	20		0	1	168.5	70.1	88.9	22.2	9	138	86	129	87	124	81
33041910	1	1	1	2	0	1	2	0.4		7	7		7	1	1	2	2	2	0			0	45	0	10			0	15		0	0	161	65.4	90.5	27.3	14	154	84	150	71	149	78
33041911	1	1	1	4	0		2	0.4		2	3			1	0	6	1	0	2			0	30	0	40					2	9	9	166	62.4	80.5			168	88	169	89	161	83
33041912	1	2	1	2	1	1	2	0.6		3				1	0	8	1	0	3			0	20							2	0	0	161.2	64.9	90.2			154	69	158	65	154	61
33041913	1	4	1	1	0		4	1		7	7			1	1	2	1	0	4			5	0	0	30						0	0	174	66.9	79.2	20.4	6	114	80	113	72	105	76
33041914	1	2	1	1	1	1	5	2			3		3	1	0	5	1	0	4					0	20			0	20		0	1	163.8	51.3	69.2	8.1	3	128	61	129	61	118	66
33041915	1	5	1	1	0		5	0.8		1	2			1	0	2	1	0	2			0	20	0	40						1	0	170	65.5	79.5	15	6	148	89	127	79	137	81
33041916	1	5	1	1	0	0	4	0.8		3	7			1	1	0	1	0	4			0	30	0	30						0	0	169.5	63.6	73.4	16.9	6	117	67	116	66	111	67
33041917	1	3	1	1	1	1	5	0.6		7	7		7	1	1	2	2	2	0			0	15	0	20			0	10		0	1	168.7	54.5	73.8	15.3	3	142	96	143	92	137	89
33041918	1	3	1	1	0	1	4	0.5			4			1	0	6	1	0	2					0	30						0	0	172	70.5	86	21.8	8	117	72	114	70	109	68
33041919	1	2	1	4	1	0	3	0.5			2			1	0	2	1	0	2					0	30						1	0	162	94.9	105.3	28.5	22	150	89	144	88	149	89
33041920	1	3	1	1	1		5	1.2		7	7			1	1	0	1	0	4			6	0	0	30						0	0	154.9	54.2	78.7	18.6	7	100	66	109	64	115	75
33041921	1	4	1	1	1	1	5	1.2				1	1	1	1	0	1	0	3							0	30	0	40		0	0	166.9	69.6	85.5	22.5	9	125	73	120	69	108	69
33041922	1	1	1	2	0		2	0.4		7	7		7	1	1	2	2	2	0			0	40	0	10			0	10		0	0	166.8	48.7	65.8	17	2	107	59	109	63	102	63
33041923	1	4	0	1	1	1	4	0.6		7	7		7	1	1	2	2	2	0			0	10	0	10			0	10		0	0	175.4	74.5	83.8	19.9	8	130	82	130	76	113	75
33041924	1	4	1	4	1	1	3	0.8						1	0	6	1	0	3												9	9	168	49.9	71.6	9.7	2	124	68	109	68	116	67
33041925	1	1	1	1	1	1	5	0.6		7	7		7	1	1	2	2	2	0			0	40	0	10			0	10		1	0	167.7	60.8	77	16.7	5	106	66	106	66	105	64
33041926	1	1	1	4	0		2	0.5			7			1	0	4	1	0	2					0	20					0	0	0	164	60.9	89.5			129	63	130	61	134	60
33041927	1	3	1	1	1	1	5	1	2	3	7			1	1	2	2	1	5	0	30	0	30	1	0						0	0	162.4	49.2	67	12.6	3	117	69	117	66	103	65
33041928	1	4	1	1	0	1	4	0.8		5	2			1	0	6	1	0	2			1	0	1	0						1	0	168.4	70.5	85	20.8	9	111	74	115	71	106	68
33041929	1	3	3	1	1	1	3	0.4		7	1		7	1	1	2	2	2	0			0	10	0	10			0	10		1	0	167	61.1	78.3	19	6	119	80	119	76	116	75
33041930	1	4	1	4	0	1	3	2	7		3			1	0	4	3	0	5	10	0			0	20						1	0	160.2	67.2	87.6	24.7	11	121	83	132	83	126	79
33041931	1	3	1	1	0	1	2	0.3	7		2			1	0	6	2	0	2	4	0			0	40						0	1	174.9	61.4	77	11.1	4	103	59	99	61	97	58
33041932	1	2	1	4	0	0	2	0.5		7	7			1	1	0	1	0	4			2	0	1	30					2	0	0	148	48.8	77.6	24.3	10	130	73	137	69	125	70
33041933	1	1	1	1	0	1	4	0.3		7	7		7	1	1	2	2	2	0			0	10	0	10			0	10		0	0	164	69.2	88.5	26.5	11	119	71	116	65	106	64
33041934	1	3	2	1	0		3	0.4		7	7		7	1	1	3	2	2	0			0	10	0	15			0	20		1	1	164	80.3	93	25	15	165	102	165	91	173	97
33041935	1	1	4	4	0		1	0.5			7			1	1	0	2	0	8					0	30					2	0	0	160.8	52.2	83.5			190	65	177	67	172	67
33041936	1	3	0	1	0		1	0.4		7	7		7	1	1	2	2	2	0			0	15	0	10			0	15		0	0	173	57.2	69.7	12.7	3	116	58	113	66	108	64
33041937	1	5	0	1	0		3	1.5	1	2	7		2	1	0	5	1	0	3	1	0	0	40	0	30			0	30		0	1	165.7	51.6	69.2	13.6	3	116	69	112	67	113	59
33041938	1	3	1	1	0		3	0.4		7	7		7	1	1	2	2	2	0			0	10	0	15			0	10		0	1	168.2	73.5	84.3	24.7	10	122	74	120	70	110	74
33041939	1	5	1	1	1		2	0.7		6			5	1	0	8	1	0	4			2	0					0	40		0	0	175	71.4	82.7	27.4	7	122	73	130	80	126	76
33041940	1	5	1	1	1		6	1.3		1	7		1	1	0	8	1	0	8			0	30	1	0			2	0		0	0	169.5	65.8	81.9	22.8	7	120	80	122	73	128	70
33041941	1	5	0	1	0		4	1		4	4		3	1	0	9	1	0	8			1	30	0	40			0	40		0	0	178	72.1	82	21.4	7	130	80	132	76	128	74
33041942	1	5	1	1	1	1	3	0.6		4			4	1	0	8	1	0	7			0	45					0	30		1	0	174.5	68.9	83	22.2	7	142	89	136	80	138	78
33041943	1	5	1	1	1		3	0.7		4	4		4	1	0	9	1	0	6			1	30	1	45			1	0		1	0	168	72.6	85.9	22.6	10	126	72	130	74	124	70
33041944	1	5	1	1	0		5	0.6			6			1	0	6	2	0	2					1	0						0	0	165	64.8	81	21	8	120	80	120	80	122	80
33041945	1	5	1	1	0	1	4	1.2			7			1	0	6	1	0	2					2	0						0	0	173	69.4	80	18.2	7	120	72	117	75	125	80
33041946	1	5	1	1	0		6	1.2			7			1	0	8	1	0	5					2	0						1	0	173.5	76.6	90	25	10	120	80	126	82	121	75
33041947	1	5	1	1	0	1	7	1.2			7			1	0	6	1	0	2					0	30						1	0	168	99	106	29.9	21	129	76	121	71	125	80
33041948	1	4	1	1	0	0	4	1.2			7			1	0	6	1	0	2					2	0						0	0	174.5	55.7	75	7.4	2	125	79	120	80	125	75
33041949	1	5	1	1	0		5	1.2			7			1	0	5	1	0	2					4	0						0	0	172	61.5	78.5	13.9	4	117	72	116	69	120	75
33041950	1	5	0	1	0		4	1.2			7			1	0	5	1	0	3					3	0						0	0	175	66.3	72	17.9	5	117	75	120	80	118	75
33041951	1	5	1	1	0		3	0.8			7			1	0	5	1	0	2					1	0						1	0	170	56.3	70.8	20.3	4	120	70	125	80	117	72
33041952	1	5	1	1	0		3	0.6			2	6		1	0	6	2	0	2					1	0	3	0				0	1	170	76.7	81.2	19.5	11	135	85	130	80	130	80
33041953	1	5	1	1	0		5	0.8			2			1	0	8	2	0	2					1	0						0	1	175	77.4	89	26.9	9	130	80	125	80	128	80
33041954	1	5	1	1	0		2	0.8			6			1	0	6	1	0	2					1	0						0	1	164.3	65.4	84	21.6	9	130	80	130	82	130	80
33041955	1	5	1	1	1	0	5	0.8			2		7	1	0	6	2	0	2					1	0			0	30		0	0	178	85.8	93	25.6	11	125	75	125	75	130	75
33042001	2	2	2	4	0		7	3.5		7	7			1	1	0	1	1	0			1	0	0	30						0	0	150	47.4	74	27.7	4	109	73	118	77	113	71
33042002	2	1	1	4	0	1	6	3.5		6	2	2		1	0	5	1	0	2			2	30	0	30	0	40				0	0	156	57.1	79	30.4	6	131	83	131	82	119	84
33042003	2	2	2	1	0	1	3	1.5		7			2	1	0	5	1	1	5			0	40					2	0		0	1	159	61.1	83	31	6	111	66	107	66	101	64
33042004	2	3	1	1	0	1	2	1.2		5	5			1	1	5	3	1	5			0	30	0	10						1	1	158.4	51.2	69	27.7	3	125	87	116	79	121	78
[truncated: 17,256 more rows]
